# Supplementary material for: Cyclodimers and Cyclotrimers of 2,3 ‐Bisalkynylated Anthracenes, Phenazines and Diazatetracenes
Source: PubMed Central journal article supplement (PMC9297893; doi:10.1002/chem.202103193), 2021-11-05
Supplement: CHEM-27-16320-s001.pdf [file CHEM-27-16320-s001.pdf]

# Chemistry–A European Journal

Supporting Information

## **Cyclodimers and Cyclotrimers of 2,3-Bisalkynylated Anthracenes, Phenazines and Diazatetracenes**

Steffen Maier, Nikolai Hippchen, Frank Rominger, Jan Freudenberg,\* and Uwe H. F. Bunz\*

## SUPPORTING INFORMATION

**Table of Contents**

|                                                     |    |
|-----------------------------------------------------|----|
| 1 Experimental Procedures.....                      | 2  |
| 1.1 Materials and Methods .....                     | 2  |
| 1.2 Synthesis.....                                  | 2  |
| 2. Results and Discussion.....                      | 11 |
| 2.1 Calculations .....                              | 11 |
| 2.1.1 FMO and AICD calculation .....                | 11 |
| 2.1.2 Calculation of Transfer Integrals.....        | 14 |
| 2.1.3 Coordinates of the Optimized Geometries ..... | 15 |
| 2.2 NMR Spectroscopy .....                          | 35 |
| 2.3. UV-vis spectra.....                            | 48 |
| 2.4 Cyclic Voltammetry .....                        | 49 |
| 2.5 Hirshfeld Analysis.....                         | 52 |
| 2.6 TGA/DSC Measurements .....                      | 54 |
| 2.7 OFET Fabrication and Measurement .....          | 57 |
| 2.6 Crystallographic Data.....                      | 58 |
| References .....                                    | 65 |

## SUPPORTING INFORMATION

## 1 Experimental Procedures

## 1.1 Materials and Methods

Column chromatography was performed using silica gel from Sigma Aldrich. (particle size: 0.032–0.062 mm). Preparative GPC was performed on Bio-Beads® (S-X1 Beads, 200 – 400 Mesh, crosslinked polystyrene), purchased from Bio-Rad Laboratories, Inc., using toluene as solvent. NMR spectra were recorded on Bruker Avance Spectrometers using the specified frequency. Chemical shifts ( $\delta$ ) are given in parts per million (ppm) relative to internal solvent signals.<sup>[S1]</sup> The following abbreviations describe the signal multiplicities: s = singlet, d = doublet, dd = doublet of doublets, m = multiplet. High-resolution mass spectra (HRMS) were obtained by (matrix-assisted) laser desorption/ionization (LDI/MALDI) using *trans*-2-[3-(4-*tert*-butylphenyl)-2-methyl-2-propenylidene]malononitrile (DCTB) as matrix, electrospray ionisation (ESI) or direct analysis in real time (DART) experiments. IR spectra were recorded as a neat oil or powder of the respective analyte on a Jasco FT/IR-4100 spectrometer. CV measurements were performed on a Metrohm Autolab PGSTAT101. Absorption spectra were recorded on a Jasco UV-Vis V-660 or Jasco UV-Vis V 670. Fluorescence spectra were recorded on a Jasco FP-6500. Quantum lifetimes ( $\tau_s$ ) were determined on a Horiba FluoroCube-01-NL lifetime spectrofluorometer with emission monochromator (Seya-Namioka type, 200 nm to 800 nm) and diode excitation (Nano-LED N-375L, 375  $\pm$  10 nm, < 200 ps) All calculations were performed using Gaussian16. TMS groups were used instead of TIPS groups to simplify calculations. First, the gas - phase ground - state equilibrium geometry of the molecules was optimized at the B3LYP/def2 - SVP level of theory. Afterwards, the received geometries were refined using the B3LYP/def2-TZVP level of theory. FMO calculations were performed starting from the optimized geometries on the B3LYP/def2-TZVP level of theory.<sup>[S2]</sup> ACID-plots were calculated starting from the optimized geometries using AICD-3.0.3 using the CSGT-method at the B3LYP/def2-TZVP IOP(10/93=1) level of theory; isovalue: 0.02; optimization limit: 0.02; maximal arrow length: 1; magnetic field vector is oriented out of plane.<sup>[S3]</sup> TIPS-Dibromoanthracene **1a** was synthesized according to a literature procedure.<sup>[S4]</sup> Hirshfeld surfaces and fingerprint plots were generated with the program CrystalExplorer 17.5.<sup>[S5]</sup> P-doped Si-wafers with 100 nm thermally grown silicon dioxide were purchased from Si-Mat. Metals used for device contacts were produced by Kurt J. Lesker Company (East Sussex, United Kingdom) and thermally evaporated. Pictures were taken at ambient conditions on a Nikon Eclipse LV100POL microscope with the included camera. TGA/DSC measurements were carried out on a Mettler-Toledo TGA/DSC1 instrument with a TGA/DSC-Sensor 1100 equipped with a MX1 balance (Mettler-Toledo) and a GC100 gas control box for nitrogen supply.

## 1.2 Synthesis

**((9,10-Bis((triisopropylsilyl)ethynyl)anthracene-2,3-diyl)bis(ethyne-2,1-diyl))bis(trimethylsilane) (2a)**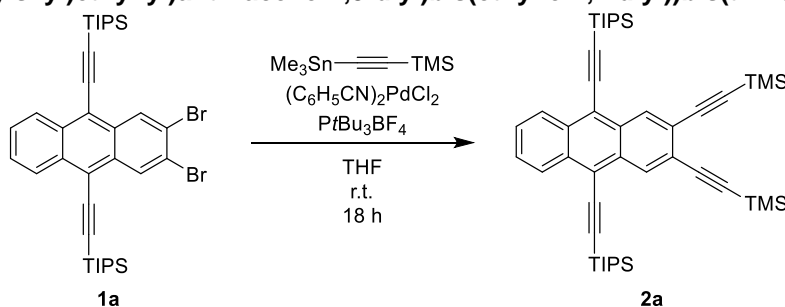

In a flame dried Schlenk tube **1a** (3.00 g, 4.31 mmol, 1.00 eq) was dissolved in 200 mL anhydrous THF under nitrogen atmosphere. The solution was degassed for 30 min. Trimethyl((trimethylstannyl)ethynyl)silane (5.62 g, 21.5 mmol, 5.00 eq.) was added and the resulting solution was degassed for additional 20 min. Subsequently, bis(benzonitrile)palladium (II) chloride (82.6 mg, 215  $\mu\text{mol}$ , 5.00 mol%) and tri-*tert* butylphosphine tetrafluoroborate (125 mg, 430  $\mu\text{mol}$ , 10.0 mol%) were added. The reaction mixture was stirred for 12 h. The solvent was removed under reduced pressure and the crude product was purified by column chromatography on silica to yield the product (3.08 g, 4.22 mmol, 98%) as a yellow solid.

<sup>1</sup>H NMR (600 MHz, 295 K, CDCl<sub>3</sub>)  $\delta$ = 8.80 (s, 2H), 8.56-8.54 (m, 2H), 7.60-7.59 (m, 2H), 1.27-1.26 (m, 42 H), 0.31 (s, 18 H) ppm.

## SUPPORTING INFORMATION

$^{13}\text{C}\{^1\text{H}\}$  NMR (151 MHz, 295 K,  $\text{CDCl}_3$ )  $\delta$ = 133.0, 132.6, 131.2, 127.6, 127.5, 122.7, 118.6, 106.1, 103.5, 102.8, 99.0, 19.0, 11.7, 0.1 ppm.

ATR-IR:  $\tilde{\nu}$  [ $\text{cm}^{-1}$ ] = 3628, 2941, 2889, 2863, 2149, 1460, 1447, 1379, 1366, 1248, 1211, 1156, 1038, 1016, 997, 932, 898, 787, 690, 676, 658, 635, 612, 591, 556, 503, 467, 445, 440, 435, 401.

HR-MS (MALDI pos.) m/z:  $[\text{M}]^+$ : calcd. for  $[\text{C}_{46}\text{H}_{66}\text{Si}_4]^+$ : 730.4242; found: 730.4245.

Melting point: > 300 °C.

$R_f$  (PE) = 0.2

**((2,3-Diethynylantracene-9,10-diyl)bis(ethyne-2,1-diyl))bis(triisopropylsilane) (3a)**

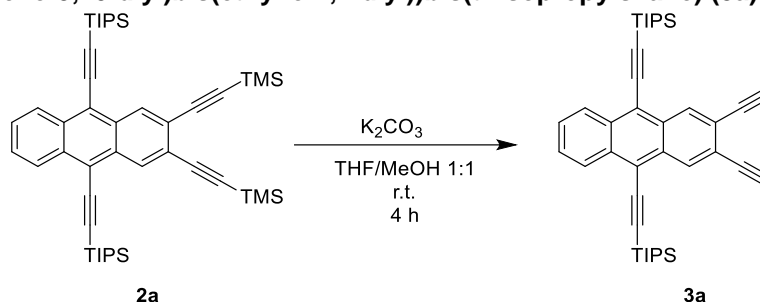

**2a** (1.00 g, 137  $\mu\text{mol}$ , 1.00 eq.) was dissolved in a mixture of 30 mL THF and 30 mL MeOH. Subsequently  $\text{K}_2\text{CO}_3$  (95.0 mg, 684  $\mu\text{mol}$ , 5.00 eq.) was added and the reaction mixture was stirred for 4 h at room temperature. Water was added and the mixture was extracted with DCM. The combined organic layers were dried over  $\text{MgSO}_4$  to yield the product (786 mg, 134  $\mu\text{mol}$ , 98%) as a yellow solid.

$^1\text{H}$  NMR (600 MHz, 295 K,  $\text{CDCl}_3$ )  $\delta$ = 8.85 (s, 2H), 8.59-8.58 (m, 2H), 7.63-7.62 (m, 2H), 1.27-1.26 (m, 42 H), ppm.

$^{13}\text{C}\{^1\text{H}\}$  NMR (151 MHz, 295 K  $\text{CDCl}_3$ )  $\delta$ = 133.2, 133.1, 131.1, 127.8, 127.6, 121.7, 118.8, 106.4, 102.6, 82.2, 81.4, 19.0, 11.6 ppm.

ATR-IR:  $\tilde{\nu}$  [ $\text{cm}^{-1}$ ] = 2939, 2924, 2885, 2861, 2364, 2358, 2341, 2336, 2330, 1557, 1495, 1480, 1464, 1456, 1431, 1382, 1285, 1196, 1187, 1105, 1053, 1020, 992, 880, 845, 771, 746, 732, 697, 683, 670, 663, 646, 639, 624, 619, 608, 597, 589, 576, 510, 504, 500, 487, 481, 463, 456.

HR-MS (MALDI pos.) m/z:  $[\text{M}+\text{H}]^+$ : calcd. for  $[\text{C}_{40}\text{H}_{50}\text{Si}_2]^+$ : 586.3446; found: 586.3448.

Melting point: > 300 °C.

$R_f$  (PE) = 0.2

[{24-[4-Methyl-3,3-di(propan-2-yl)pent-1-yn-1-yl]-7,8,9,10,19,20,21,22-octadecahydrocyclododeca[1,12-*b*:6,7-*b*]dianthracene-5,12,17-triyl}tri(ethyne-2,1-diyl)]tris[tri(propan-2-yl)silane] (3a<sub>2</sub>)/ [{36-[4-Methyl-3,3-di(propan-2-yl)pent-1-yn-1-yl]-7,8,9,10,19,20,21,22,31,32,33,34-dodecadehydrocyclooctadeca[1,18-*b*:12,13-*b*:6,7-*b*']trianthracene-5,12,17,24,29-pentayl}penta(ethyne-2,1-diyl)]pentakis[tri(propan-2-yl)silane](3a<sub>3</sub>)

## SUPPORTING INFORMATION

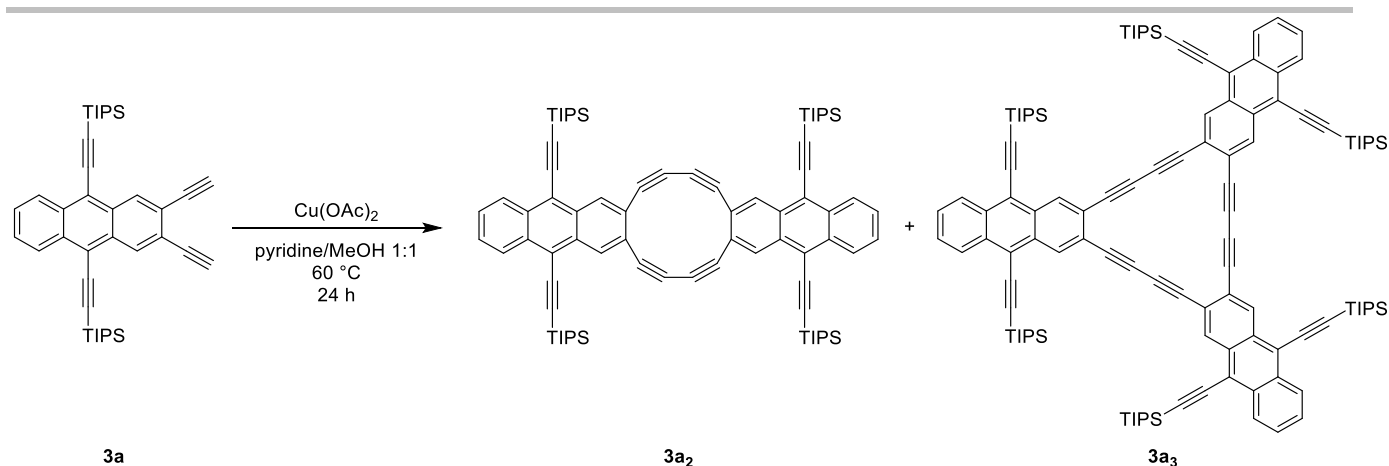

Copper (II) acetate (6.00 g, 30.0 mmol, 22.0 eq.) was dissolved in a mixture of 400 mL pyridine and 400 mL methanol. The mixture was heated to 60 °C. A solution of **3a** (800 mg, 1.36 mmol, 1.00 eq.) in 20 mL of pyridine was added dropwise using a syringe pump (rate 0.06 mmol/h). After completion of the addition, the reaction mixture was stirred for additional 4 h. After cooling to room temperature the solvent was removed under reduced pressure. Water and DCM were added and the mixture was extracted with DCM. The combined organic layers were dried over MgSO<sub>4</sub> and the solvent was removed under reduced pressure. The crude product was purified by column chromatography on Silica (PE:DCM 9:1, 8:2, 1:1) to yield a mixture of **3a<sub>2</sub>** and **3a<sub>3</sub>** containing some small impurities. Purification of the mixture using GPC yielded the dimer **3a<sub>2</sub>** (104 mg, 89.0 μmol 13%) as an orange brown solid and the trimer **3a<sub>3</sub>** (200 mg, 171 μmol, 25%) as an orange brown solid.

**3a<sub>2</sub>:**

**<sup>1</sup>H NMR (600 MHz, 295 K, THF-d<sub>8</sub>)** δ= 8.62-8.60 (m, 8H), 7.72-7.70 (m, 4H), 1.32-1.31 (m, 84 H), ppm.

**<sup>13</sup>C{<sup>1</sup>H} NMR (151 MHz, 295 K, THF-d<sub>8</sub>)** δ= 134.5, 132.2, 129.6, 129.3, 128.3, 125.7, 120.6, 107.8, 103.3, 93.0, 85.5, 19.4, 12.6 ppm.

**ATR-IR:**  $\tilde{\nu}$  [cm<sup>-1</sup>] = 2941, 2923, 2863, 2725, 2361, 2144, 2138, 2128, 1734, 1619, 1457, 1377, 1337, 1290, 1241, 1156, 1071, 1047, 1015, 996, 919, 892, 883, 857, 817, 762, 701, 605, 592, 569, 565, 503, 479, 466, 455, 449, 436, 424, 414, 401.

**HR-MS (MALDI pos.)** m/z: [M+H]<sup>+</sup>: calcd. for [C<sub>80</sub>H<sub>97</sub>Si<sub>4</sub>]<sup>+</sup>: 1169.6662; found: 1169.6684.

**Melting point:** > 300 °C.

R<sub>f</sub> (PE:DCM 9:1) = 0.4

**3a<sub>3</sub>:**

**<sup>1</sup>H NMR (300 MHz, 295 K, CDCl<sub>3</sub>)** δ= 8.94 (s, 2H), 8.65-8.62 (m, 2H), 7.67-7.64 (m, 2H), 1.35-1.33 (m, 42 H), ppm.

**<sup>13</sup>C{<sup>1</sup>H} NMR (126 MHz, 295 K CD<sub>2</sub>Cl<sub>2</sub>)** δ= 134.2, 133.8, 131.3, 129.4, 128.5, 127.9, 125.6, 121.6, 119.4, 107.5, 102.6, 81.7, 78.6, 19.1, 11.9 ppm.

**ATR-IR:**  $\tilde{\nu}$  [cm<sup>-1</sup>] = 3839, 3735, 3650, 2941, 2889, 2863, 2362, 2357, 2344, 2140, 2135, 2123, 1734, 1717, 1684, 1559, 1507, 1458, 1380, 1366, 1340, 1275, 1267, 1249, 1184, 1157, 1136, 1072, 1048, 1016, 993, 918, 894, 880, 828, 758, 735, 726, 710, 689, 675, 655, 603, 591, 564, 559, 503, 486, 472, 462, 458, 447, 436, 429, 424, 419, 410, 406, 402.

**HR-MS (MALDI pos.)** m/z: [M]<sup>+</sup>: calcd. for [C<sub>120</sub>H<sub>144</sub>Si<sub>6</sub>]<sup>+</sup>: 1752.9878; found: 1752.9889.

**Melting point:** > 300 °C.

## SUPPORTING INFORMATION

$R_f$  (PE:DCM 9:1) = 0.6

### 7,8-Dibromo-1,4-bis((triisopropylsilyl)ethynyl)phenazine (1b)

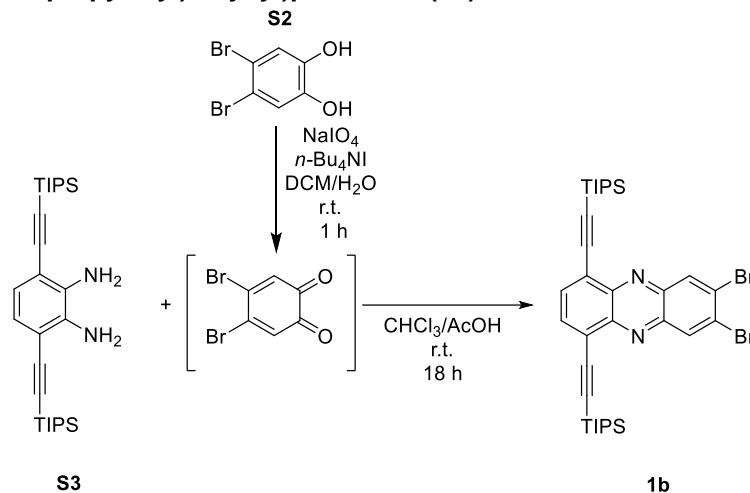

Diol **S2** (180 mg, 672  $\mu\text{mol}$ , 1.00eq.) was dissolved in 5 mL of DCM. Subsequently sodium (meta)periodate (172 mg, 806  $\mu\text{mol}$ , 1.20 eq.) and  $\text{NBu}_4\text{I}$  (10.0 mg, 26.9  $\mu\text{mol}$ , 0.04 eq.) were added. After addition of 5 mL of water, the reaction mixture was stirred for 1 h at room temperature. The reaction mixture was extracted with DCM and the combined organic layers were dried over  $\text{MgSO}_4$ . After removing of the solvent, crude quinone was dissolved in a mixture of 2 mL  $\text{CHCl}_3$  and 2 mL acetic acid. After addition of diamine **S3** (200 mg, 427  $\mu\text{mol}$ , 0.66 eq.) the reaction mixture was stirred at room temperature overnight. The end of the reaction was monitored by TLC and a saturated aqueous solution of  $\text{NaHCO}_3$  was added to neutralize the reaction mixture. The aqueous phase was extracted with DCM, the combined organic layers were dried over  $\text{MgSO}_4$  and the solvent was removed under reduced pressure. The crude product was purified by column chromatography on silica gel (PE:DCM 95:5, 9:1) to yield **1b** as an orange solid (58.0 mg, 83.3  $\mu\text{mol}$ , 19%).

$^1\text{H NMR}$  (400 MHz, 295 K,  $\text{CDCl}_3$ )  $\delta$ = 8.55 (s, 2H), 7.95 (s, 2H), 1.25-1.24 (m, 42 H), ppm.

$^{13}\text{C}\{^1\text{H}\}$  NMR (101 MHz, 295 K  $\text{CDCl}_3$ )  $\delta$ = 144.0, 142.5, 134.7, 133.9, 128.2, 124.7, 103.2, 101.7, 18.9, 11.6 ppm.

**ATR-IR:**  $\tilde{\nu}$  [ $\text{cm}^{-1}$ ] = 2955, 2941, 2890, 2863, 1463, 1446, 1418, 1406, 1367, 1244, 1129, 1073, 1050, 1040, 1035, 996, 879, 849, 791, 675, 663, 642, 628, 593, 585, 665, 659, 649, 640, 628, 593, 589, 585, 577, 566, 559, 549, 541, 534, 525, 521, 516, 509, 504, 494, 487, 481, 476, 472, 468, 463, 456, 449, 444, 439, 436, 430, 420, 417, 412, 407.

**HR-MS (MALDI pos.)**  $m/z$ :  $[\text{M}]^+$ : calcd. for  $[\text{C}_{34}\text{H}_{46}\text{N}_2\text{Si}_2^{79}\text{Br}^{81}\text{Br}]^+$ : 698.1551; found: 698.1551.

**Melting point:** > 300 °C.

$R_f$  (PE:DCM 9:1) = 0.3

### 1,4-Bis((triisopropylsilyl)ethynyl)-7,8-bis((trimethylsilyl)ethynyl)phenazine (2b)

## SUPPORTING INFORMATION

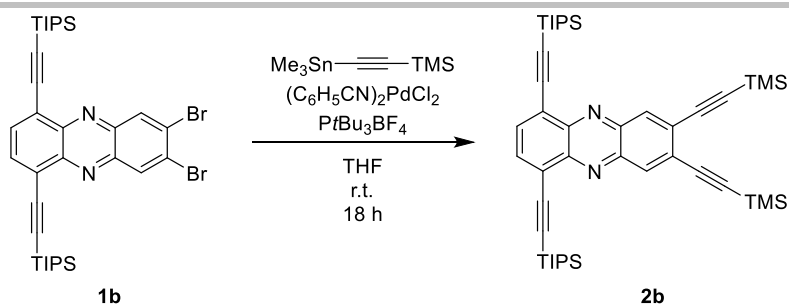

In a flame dried Schlenk tube **1b** (450 mg, 644  $\mu\text{mol}$ , 1.00 eq) was dissolved in 50 mL dry THF under nitrogen atmosphere. The solution was degassed for 30 min. Trimethyl((trimethylstannyl)ethynyl)silane (841 g, 3.22 mmol, 5.00 eq.) was added and the resulting solution was degassed for additional 20 min. Subsequently bis(benzonitril) palladium (II) chloride (24.7 mg, 64.4  $\mu\text{mol}$ , 10.0 mol%) and tri-*tert* butylphosphine tetrafluoroborate (37.4 mg, 129  $\mu\text{mol}$ , 20.0 mol%) were added. The reaction mixture was stirred for 12 h. The solvent was removed under reduced pressure and the crude product was purified by column chromatography on silica gel (PE:DCM 9:1  $\rightarrow$  8:2) to yield the product (425 mg, 580  $\mu\text{mol}$ , 90%) as an orange solid.

$^1\text{H NMR}$  (400 MHz, 295 K,  $\text{CDCl}_3$ )  $\delta$ = 8.30 (s, 2Hs), 7.92 (s, 2Hs), 7.60-7.59 (m, 2Hs), 1.25 (m, 42 Hs), 0.35 (s, 18 Hs) ppm.

$^{13}\text{C}\{^1\text{H}\}$  NMR (101 MHz, 295 K,  $\text{CDCl}_3$ )  $\delta$ = 144.0, 142.8, 134.4, 134.3, 127.3, 124.7, 103.5, 102.6, 102.4, 101.2, 19.0, 11.6, 0.1 ppm.

**ATR-IR:**  $\tilde{\nu}$  [ $\text{cm}^{-1}$ ] = 2942, 2891, 2864, 2155, 1457, 1443, 1419, 1412, 1383, 1366, 1350, 1249, 1229, 1186, 1145, 1126, 1071, 1048, 1037, 1013, 996, 990, 878, 841, 814, 807, 784, 760, 701, 675, 660, 643, 636, 607, 592, 553, 549, 520, 503, 486, 476, 470, 461, 455, 425, 421.

**HR-MS (MALDI pos.)**  $m/z$ :  $[\text{M}+\text{H}]^+$ : calcd. for  $[\text{C}_{44}\text{H}_{65}\text{N}_2\text{Si}_4]^+$ : 733.4219; found: 733.4208.

**Melting point:** > 300  $^\circ\text{C}$ .

$R_f$  (PE:DCM 9:1) = 0.2

### 7,8-Diethynyl-1,4-bis((triisopropylsilyl)ethynyl)phenazine (**3b**)

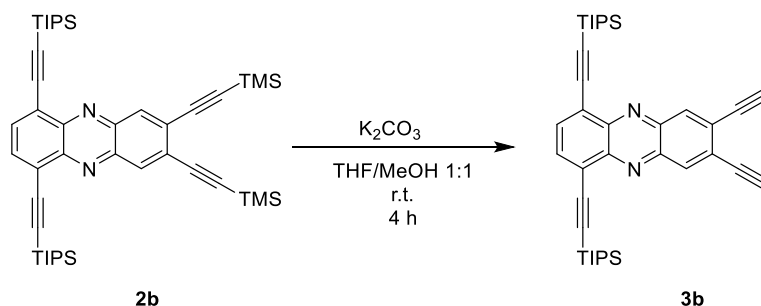

**2b** (295 mg, 402  $\mu\text{mol}$ , 1.00 eq.) was dissolved in a mixture of 10 mL THF and 10 mL MeOH. Subsequently  $\text{K}_2\text{CO}_3$  (278 mg, 2.01 mmol, 5.00 eq.) was added and the reaction mixture was stirred for 4 h. Water was added and the mixture was extracted with DCM. The combined organic layers were dried over  $\text{MgSO}_4$ . The crude product was purified by column chromatography on silica gel (PE:DCM 8:2) to yield the product (227 mg, 386  $\mu\text{mol}$ , 96%) as an orange solid.

$^1\text{H NMR}$  (400 MHz, 295 K,  $\text{CD}_2\text{Cl}_2$ )  $\delta$ = 8.41 (s, 2H), 7.98 (s, 2H), 3.65 (s, 2H), 1.26 (m, 42 H), ppm.

$^{13}\text{C}\{^1\text{H}\}$  NMR (101 MHz, 295 K  $\text{CD}_2\text{Cl}_2$ )  $\delta$ = 144.5, 143.0, 135.1, 135.0, 126.6, 125.0, 103.7, 101.7, 84.6, 81.4, 19.0, 11.9 ppm.

## SUPPORTING INFORMATION

**ATR-IR:**  $\tilde{\nu}$  [cm<sup>-1</sup>] = 3308, 2942, 2890, 2360, 2356, 2342, 2336, 2312, 2163, 2147, 2026, 2002, 1968, 1653, 1559, 1507, 1457, 1247, 1124, 1072, 1051, 1037, 1017, 997, 891, 882, 850, 798, 675, 669, 662, 658, 654, 649, 644, 635, 631, 626, 621, 618, 609, 602, 598, 593, 585, 567, 559, 556, 546, 538, 533, 524, 519, 507, 499, 492, 485, 481, 472, 463, 453, 448, 442, 434, 429, 426, 412, 406.

**HR-MS (MALDI pos.)** m/z: [M]<sup>+</sup>: calcd. for [C<sub>38</sub>H<sub>49</sub>N<sub>2</sub>Si<sub>2</sub>]<sup>+</sup>: 589.3429; found: 589.3426.

**Melting point:** > 300 °C.

R<sub>f</sub> (PE:DCM 8:2) = 0.3

**5,8-Bis{[tri(propan-2-yl)silyl]ethynyl}quinoxaline—1-[4-methyl-3,3-di(propan-2-yl)pent-1-yn-1-yl]-4,21,24-tris{[tri(propan-2-yl)silyl]ethynyl}-7,8,9,10,15,16,17,18,27,28,29,30-dodecadehydroanthra[2',3':13,14]benzo[7,8]cyclooctadeca[1,2-*b*]phenazine (3b<sub>3</sub>)**

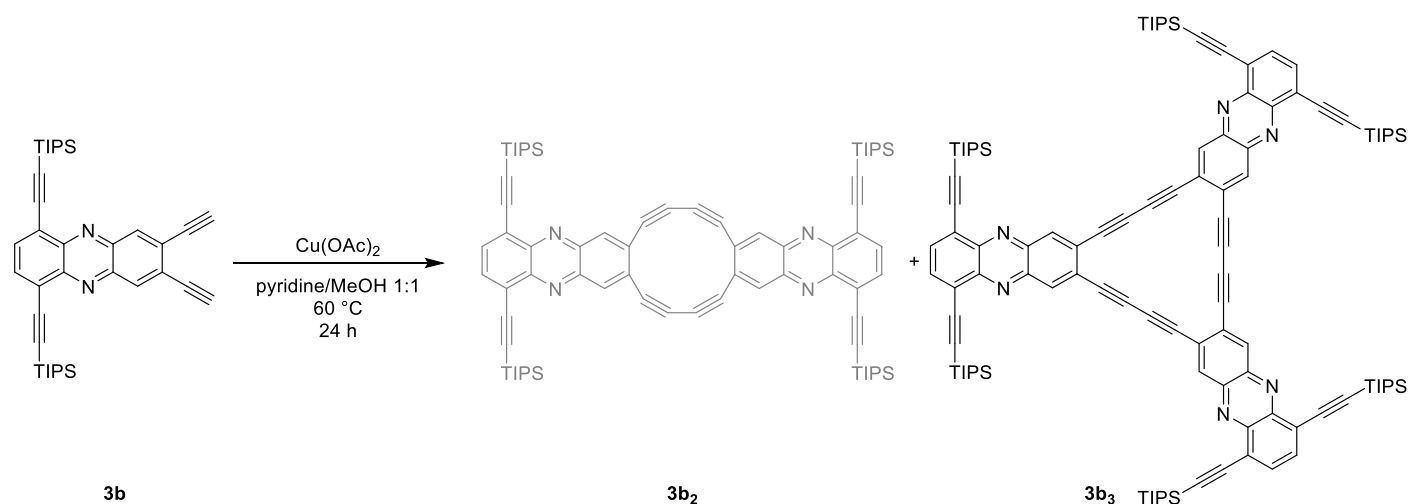

Copper (II) acetate (969 mg, 4.88 mmol, 22.0 eq.) was dissolved in a mixture of 70 mL pyridine and 70 mL methanol. The mixture was heated to 60 °C. Afterwards a solution of **3b** (130 mg, 221 μmol, 1.00 eq.) in 20 mL of pyridine was added dropwise using a syringe pump (rate 0.06 mmol/h). After completion of the addition, the reaction mixture was stirred for additional 4 h. After cooling to room temperature the solvent was removed under reduced pressure. Water and DCM were added and the mixture was extracted with DCM. The combined organic layers were dried over MgSO<sub>4</sub> and the solvent was removed under reduced pressure. The crude product was purified by column chromatography on silica (PE:DCM 9:1, 8:2, 1:1) to yield a mixture of **3b<sub>3</sub>** containing some small impurities. Purification of the mixture using a GPC yield the trimer **3b<sub>3</sub>** (22 mg, 12.5 μmol, 17%) as an orange brown solid. **3b<sub>2</sub>** was not isolated, probably due to its low solubility.

**3b<sub>3</sub>:**

**<sup>1</sup>H NMR (600 MHz, 295 K, CDCl<sub>3</sub>)** δ= 8.51 (s, 2Hs), 7.98 (s, 2Hs), 1.29 (m, 42 Hs), ppm.

**<sup>13</sup>C{<sup>1</sup>H} NMR (151 MHz, 295 K CDCl<sub>3</sub>)** δ= 144.3, 142.8, 136.0, 135.0, 125.6, 124.7, 103.2, 101.8, 81.6, 80.8, 19.0, 11.6 ppm.

**ATR-IR:**  $\tilde{\nu}$  [cm<sup>-1</sup>] = 3670, 2941, 2889, 2863, 2776, 2756, 2723, 2365, 2361, 2341, 2337, 2331, 2235, 2211, 2205, 2202, 2196, 2184, 2178, 2170, 2167, 2161, 2153, 2146, 2140, 2135, 2128, 2117, 2113, 2106, 2101, 2092, 2078, 2075, 2070, 2065, 2040, 2036, 2031, 2022, 2015, 1991, 1986, 1973, 1884, 1605, 1567, 1500, 1462, 1456, 1441, 1395, 1383, 1366, 1337, 1301, 1245, 1221, 1159, 1135, 1123, 1073, 1050, 1036, 1017, 995, 919, 908, 882, 848, 791, 758, 743, 734, 722, 697, 674, 659, 641, 600, 591, 587, 564, 545, 538, 534, 525, 506, 503, 494, 487, 477, 471, 466, 462, 454, 450, 447, 440, 432.



## SUPPORTING INFORMATION

**HR-MS (MALDI pos.)** m/z: [M]<sup>+</sup>: calcd. for [C<sub>114</sub>H<sub>138</sub>N<sub>6</sub>Si<sub>6</sub>]<sup>+</sup>: 1758.9599; found: 1758.9830.

**Melting point:** > 300 °C.

**R<sub>f</sub>** (PE:DCM 8:2) = 0.3

**2,3-Dibromo-6,11-bis((*sec*-butyl-1,2-silyl)ethynyl)benzo[*b*]phenazine--3,4-dimethylhexane (1c)**

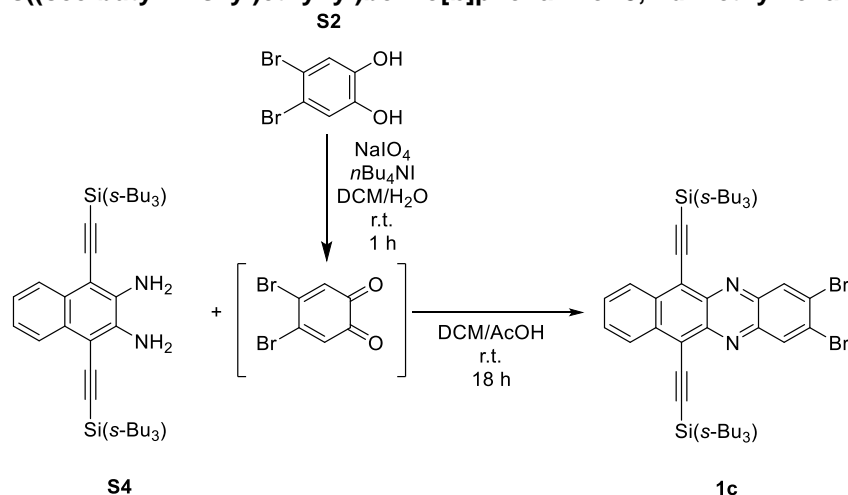

Diol **S2** (1.54 g, 5.75 μmol, 1.00eq.) was dissolved in 30 mL of DCM. Subsequently sodium meta periodate (1.48 g, 6.90 mmol, 1.20 eq.) and NBu<sub>4</sub>I (70.9 mg, 230 μmol, 0.04 eq.) were added. After addition of 30 mL of water, the reaction mixture was stirred for 1 h at room temperature. The reaction mixture was extracted with DCM and the combined organic layers were dried over MgSO<sub>4</sub>. After removing of the solvent, crude quinone was dissolved in a mixture of 10 mL DCM and 10 mL acetic acid. After addition of diamine **S4** (1.50 g, 2.49 mmol, 0.43 eq.) the reaction mixture was stirred at room temperature over night. The end of the reaction was monitored by TLC and an aqueous solution of NaHCO<sub>3</sub> was added to neutralize the reaction mixture. The aqueous phase was extracted with DCM, the combined organic layers were dried over MgSO<sub>4</sub> and the solvent was removed under reduced pressure. The crude product was purified by column chromatography on silica gel (PE:DCM 95:5, 9:1) to yield **1c** as a dark red solid (1.64 g, 1.98 mmol, 79%).

**<sup>1</sup>H NMR (600 MHz, 295 K, CDCl<sub>3</sub>)** δ= 8.70-8.68 (m, 2H), 8.30 (s, 2H), 7.65-7.63 (m, 2H), 1.98-1.93 (m, 6 H), 1.52-1.47 (m, 6H), 1.28-1.27 (m, 18 H), 1.11-1.08 (m, 24H) ppm.

**<sup>13</sup>C{<sup>1</sup>H} NMR (151 MHz, 295 K CDCl<sub>3</sub>)** δ= 143.2, 141.5, 135.9, 134.0, 128.6, 128.4, 127.9, 121.2, 110.1, 110.1, 102.7, 25.7, 25.6, 19.3, 19.3, 19.3, 14.8, 14.8, 14.8, 14.0, 13.9 ppm.

**ATR-IR:**  $\tilde{\nu}$  [cm<sup>-1</sup>] = 3650, 3629, 2954, 2921, 2869, 2359, 2344, 2339, 2331, 1457, 1389, 1044, 762, 694, 687, 682, 670, 648, 519, 490.

**HR-MS (MALDI pos.)** m/z: [M+H]<sup>+</sup>: calcd. for [C<sub>44</sub>H<sub>60</sub>N<sub>2</sub>Si<sub>2</sub><sup>79</sup>Br<sub>2</sub>]<sup>+</sup>: 831.2735; found: 831.2742.

**Melting point:** > 300 °C.

**R<sub>f</sub>** (PE:DCM 9:1) = 0.25

**3,4-Dimethylhexane-6,11-bis((*sec*-butyl-1,2-silyl)ethynyl)-2,3-bis((trimethylsilyl)ethynyl)benzo[*b*]phenazine (2c)**

## SUPPORTING INFORMATION

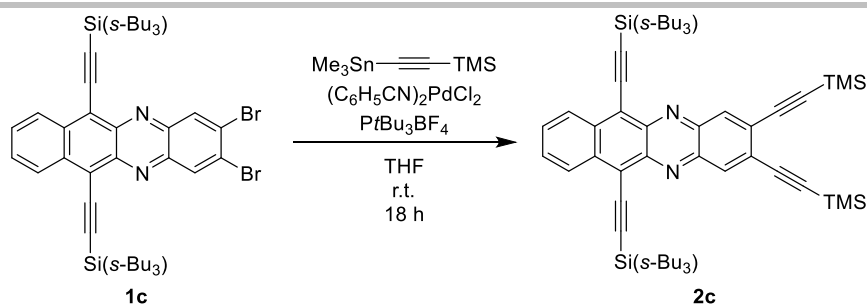

In a flame dried Schlenk tube **1c** (1.64 g, 1.97 mmol, 1.00 eq) was dissolved in 100 mL dry THF under nitrogen atmosphere. The solution was degassed for 30 min. Trimethyl((trimethylstannyl)ethynyl)silane (2.57 g, 9.84 mmol, 5.00 eq.) was added and the resulting solution was degassed for additional 20 min. Subsequently bis(benzonitril)palladium (II) chloride (75.5 mg, 197  $\mu\text{mol}$ , 10.0 mol%) and tri-*tert* butyl-phosphine-tetrafluoroborate (114 mg, 394  $\mu\text{mol}$ , 20.0 mol%) were added. The reaction mixture was stirred for 12 h. The solvent was removed under reduced pressure and the crude product was purified by column chromatography on silica gel (PE:DCM 95:5, 9:1) to yield the product (1.65 g, 1.90 mmol, 97%) as a dark red solid.

**$^1\text{H}$  NMR (600 MHz, 295 K,  $\text{CDCl}_3$ )**  $\delta$  = 8.70-8.68 (m, 2Hs), 8.30 (s, 2Hs), 7.65-7.63 (m, 2Hs), 1.99-1.95 (m, 6Hs), 1.53-1.47 (m, 6Hs), 1.29-1.28 (m, 18Hs), 1.11-1.09 (m, 24Hs), 0.36 (s, 18 Hs) ppm.

**$^{13}\text{C}\{^1\text{H}\}$  NMR (151 MHz, 295 K,  $\text{CDCl}_3$ )**  $\delta$  = 143.6, 141.7, 135.7, 134.5, 128.3, 127.8, 127.1, 121.2, 109.7, 102.9, 102.8, 102.7, 25.7, 19.3, 14.8, 13.9, 13.9, 13.9, 0.1 ppm.

**ATR-IR:**  $\tilde{\nu}$  [ $\text{cm}^{-1}$ ] = 2956, 2926, 2868, 1458, 1453, 1441, 1429, 1410, 1389, 1369, 1265, 1250, 1187, 1149, 1098, 1042, 999, 961, 914, 889, 840, 794, 760, 742, 700, 687, 679, 661, 654, 632, 570, 517, 492, 482, 468 419.

**HR-MS (MALDI pos.)**  $m/z$ : [ $\text{M}]^+$ : calcd. for  $[\text{C}_{54}\text{H}_{78}\text{N}_2\text{Si}_4]^+$ : 866.5237; found: 866.5227.

**Melting point:** > 300 °C.

**$R_f$**  (PE:DCM 9:1) = 0.3

### 2,3-Diethynyl-6,11-bis((tri-*sec*-butylsilyl)ethynyl)benzo[*b*]phenazine (**3c**)

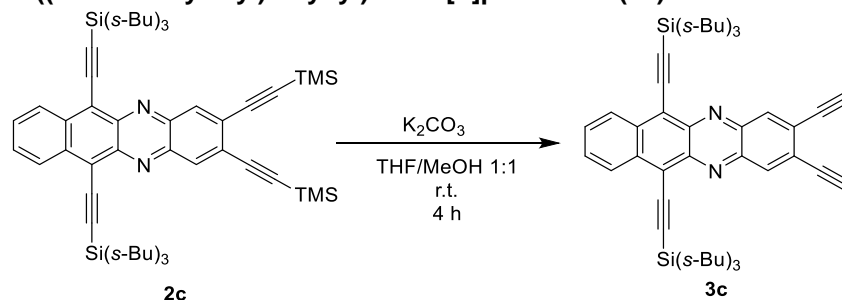

**2c** (600 mg, 692  $\mu\text{mol}$ , 1.00 eq.) was dissolved in a mixture of 40 mL THF and 40 mL MeOH. Subsequently  $\text{K}_2\text{CO}_3$  (478 mg, 3.46 mmol, 5.00 eq.) was added and the reaction mixture was stirred for 4 h. Water was added and the mixture was extracted with DCM. The combined organic layers were dried over  $\text{MgSO}_4$  to yield the product (460 mg, 637  $\mu\text{mol}$ , 92%) as a dark red solid.

**$^1\text{H}$  NMR (400 MHz, 295 K,  $\text{CD}_2\text{Cl}_2$ )**  $\delta$  = 8.75-8.72 (m, 2H), 8.42 (s, 2H), 7.71-7.69 (m, 2H), 3.69 (s, 2H), 2.01-1.93 (m, 6 H), 1.57-1.49 (m, 6H), 1.32-1.30 (m, 18H), 1.13-1.10 (m, 24H) ppm.

**$^{13}\text{C}\{^1\text{H}\}$  NMR (101 MHz, 295 K,  $\text{CD}_2\text{Cl}_2$ )**  $\delta$  = 143.9, 142.1, 136.2, 135.4, 129.0, 128.1, 126.5, 121.6, 110.4, 103.1, 84.9, 81.5, 26.0, 19.7, 14.9, 14.1 ppm.

**ATR-IR:**  $\tilde{\nu}$  [ $\text{cm}^{-1}$ ] = 3306, 3283, 2954, 2928, 2868, 2738, 2726, 2362, 2357, 2344, 2331, 2323, 2173, 2164, 2160, 2154, 2143, 2138, 2131, 2105, 1507, 1457, 1442, 1435, 1410, 1389, 1369, 1338, 1312, 1283, 1264, 1226, 1213,

## SUPPORTING INFORMATION

1186, 1169, 1147, 1104, 1095, 1041, 998, 965, 909, 886, 849, 806, 779, 682, 669, 661, 611, 592, 586, 552, 547, 537, 514, 510, 504, 497, 470, 466, 459, 453, 448, 443, 436, 430, 427, 423, 416, 412, 405.

**HR-MS (MALDI pos.)** m/z: [M+H]<sup>+</sup>: calcd. for [C<sub>48</sub>H<sub>63</sub>N<sub>2</sub>Si<sub>2</sub>]<sup>+</sup>: 723.4524; found: 723.4508.

**Melting point:** > 300 °C.

R<sub>f</sub> (PE:DCM 9:1) = 0.25

**5,10-Bis{[tri(butan-2-yl)silyl]ethynyl}benzo[*g*]quinoxaline—5-[3,3-di(butan-2-yl)-4-methylhex-1-yn-1-yl]-22-{[tri(butan-2-yl)silyl]ethynyl}-8,9,10,11,16,17,18,19-octadecyhydrobenzo[*b*]benzo[7,8]cyclo[1,2-*l*]phenazine (3c<sub>2</sub>)/5,10-Bis{[tri(butan-2-yl)silyl]ethynyl}benzo[*g*]quinoxaline—36-[3,3-di(butan-2-yl)-4-methylhex-1-yn-1-yl]-5,22,27-tris{[tri(butan-2-yl)silyl]ethynyl}-8,9,10,11,16,17,18,19,30,31,32,33-dodecacyhydrobenzo[*b*]benzo[13,14]tetraceno[2',3':7,8]cyclo[1,2-*l*]phenazine (3c<sub>3</sub>)**

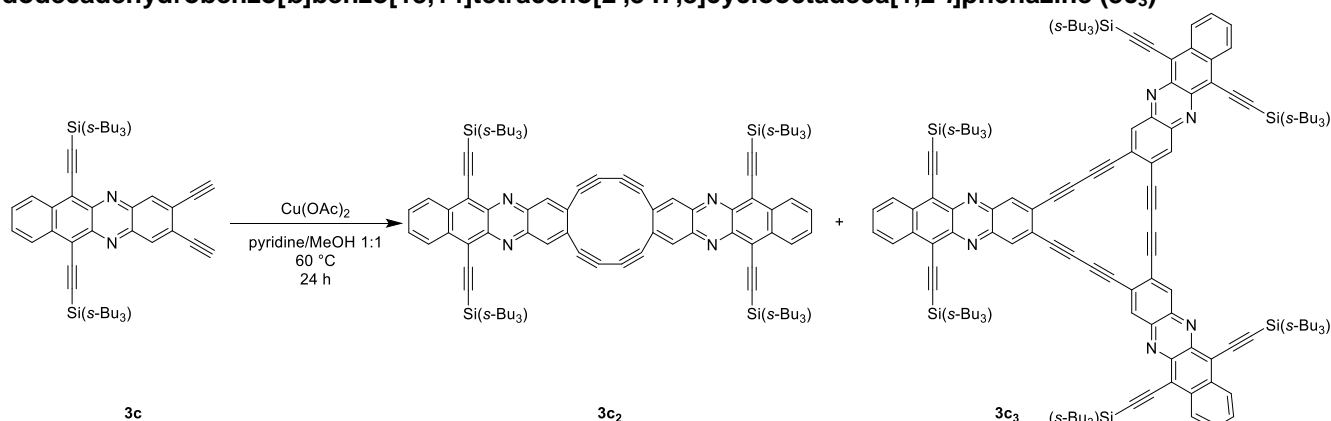

Copper (II) acetate (3.04 g, 15.2 mmol, 22.0 eq.) was dissolved in a mixture of 175 mL pyridine and 175 mL methanol. The mixture was heated to 60 °C. Afterwards a solution of **3c** (500 mg, 691 μmol, 1.00 eq.) in 20 mL of pyridine was added dropwise using a syringe pump (rate 0.06 mmol/h). After completion of the addition, the reaction mixture was stirred for additional 4 h. After cooling to room temperature the solvent was removed under reduced pressure. Water and DCM were added and the mixture was extracted with DCM. The combined organic layers were dried over MgSO<sub>4</sub> and the solvent was removed under reduced pressure. The crude product was purified by column chromatography on Silica (PE:DCM 8:2, 7:3, 1:1) to yield a mixture of **3c<sub>2</sub>** and **3c<sub>3</sub>** containing some small impurities. Purification of the mixture using a GPC yield the dimer **3c<sub>2</sub>** (60.0 mg, 54.3 μmol, 12%) as a dark brown solid and the trimer **3c<sub>3</sub>** (100 mg, 46.3 μmol, 20%) as a dark brown solid.

**3c<sub>2</sub>:**

**<sup>1</sup>H NMR (600 MHz, 295 K, CDCl<sub>3</sub>)** δ= 8.67-8.65 (m, 4H), 8.06 (s, 4H), 7.54-7.52 (m, 4H), 2.00-1.96 (m, 12 H), 1.56-1.50 (m, 12H), 1.33-1.25 (m, 36 H), 1.17-1.10 (m, 48H) ppm.

**<sup>13</sup>C{<sup>1</sup>H} NMR (151 MHz, 295 K CDCl<sub>3</sub>)** δ= 144.1, 142.0, 136.0, 131.0, 128.1, 127.9, 121.4, 110.1, 102.8, 92.3, 86.7, 25.7, 25.7, 19.3, 19.3, 19.3, 14.9, 14.9, 14.0, 14.0 ppm.

**ATR-IR:**  $\tilde{\nu}$  [cm<sup>-1</sup>] = 2953, 2923, 2867, 1450, 1417, 1389, 1369, 1335, 1261, 1186, 1144, 1095, 1042, 998, 965, 949, 883, 876, 849, 760, 700, 693, 683, 669, 661, 658, 653, 648, 644, 640, 634, 608, 512, 502, 498, 494, 487, 480, 471, 468, 461, 452, 442, 440, 431, 428, 423, 416, 408, 403.

**HR-MS (MALDI pos.)** m/z: [M+H]<sup>+</sup>: calcd. for [C<sub>96</sub>H<sub>121</sub>N<sub>4</sub>Si<sub>4</sub>]<sup>+</sup>: 1441.8663; found: 1441.8716.

**Melting point:** > 300 °C.

R<sub>f</sub> (PE:DCM 7:3) = 0.4

SUPPORTING INFORMATION

---

**3c<sub>3</sub>:**

**<sup>1</sup>H NMR (700 MHz, 295 K, CDCl<sub>3</sub>)** δ= 8.73-8.72 (m, 6H), 8.54 (s, 6H), 7.69-7.68 (m, 6H), 2.00-1.97 (m, 18 H), 1.55-1.50 (m, 18H), 1.34-1.33 (m, 54 H), 1.18-1.12 (m, 72H) ppm.

**<sup>13</sup>C{<sup>1</sup>H} NMR (176 MHz, 295 K CDCl<sub>3</sub>)** δ= 143.6, 141.9, 136.5, 136.1, 128.7, 127.9, 125.4, 121.5, 110.3, 110.3, 102.8, 82.1, 81.3, 25.7, 19.3, 19.3, 14.9, 14.0, 14.0 ppm.

**ATR-IR:**  $\tilde{\nu}$  [cm<sup>-1</sup>] = 2952, 2927, 2922, 2867, 1457, 1429, 1388, 1369, 1328, 1262, 1186, 1163, 1149, 1096, 1042, 998, 964, 950, 887, 849, 760, 702, 689, 677, 652, 648, 622, 616, 517, 510, 502, 493, 479, 475, 469, 464, 461, 458, 454, 447, 444, 438, 430, 420, 417, 413, 406.

**HR-MS (MALDI pos.)** m/z: [M+H]<sup>+</sup>: calcd. for [C<sub>144</sub>H<sub>181</sub>N<sub>6</sub>Si<sub>6</sub>]<sup>+</sup>: 2162.2958; found: 2162.2910.

**Melting point:** > 300 °C.

**R<sub>f</sub>** (PE:DCM 7:3) = 0.3

## 2. Results and Discussion

### 2.1 Calculations

#### 2.1.1 FMO and AICD calculation

## SUPPORTING INFORMATION

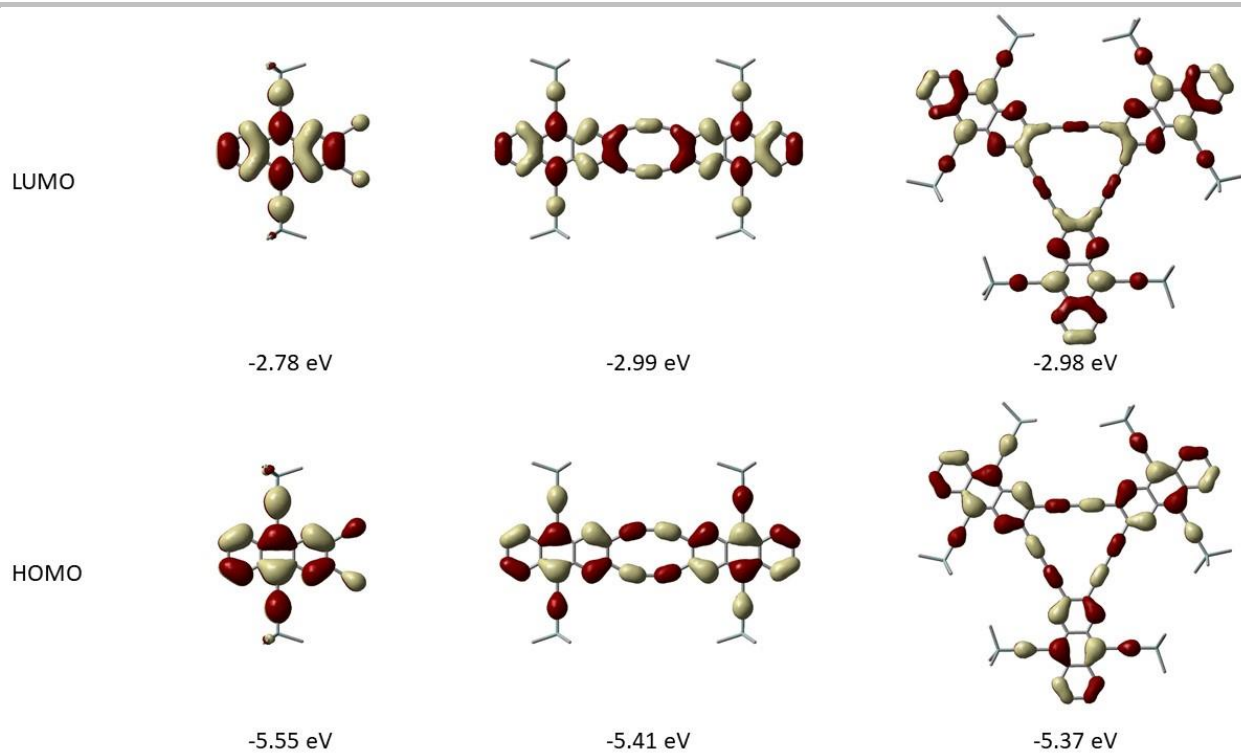

**Figure S1.** Calculated FMOs of **3a** (left), **3a<sub>2</sub>** (middle) and **3a<sub>3</sub>** (right).

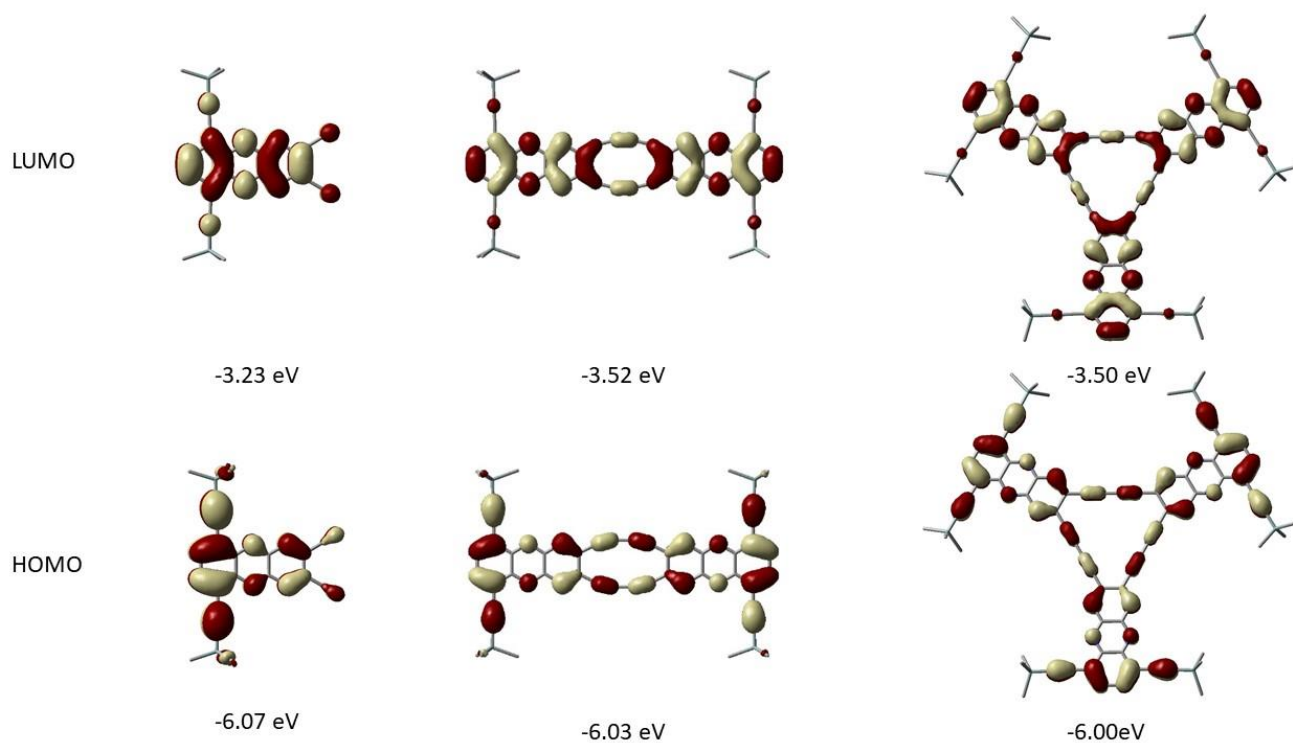

**Figure S2.** Calculated FMOs of **3b** (left), **3b<sub>2</sub>** (middle) and **3b<sub>3</sub>** (right)

## SUPPORTING INFORMATION

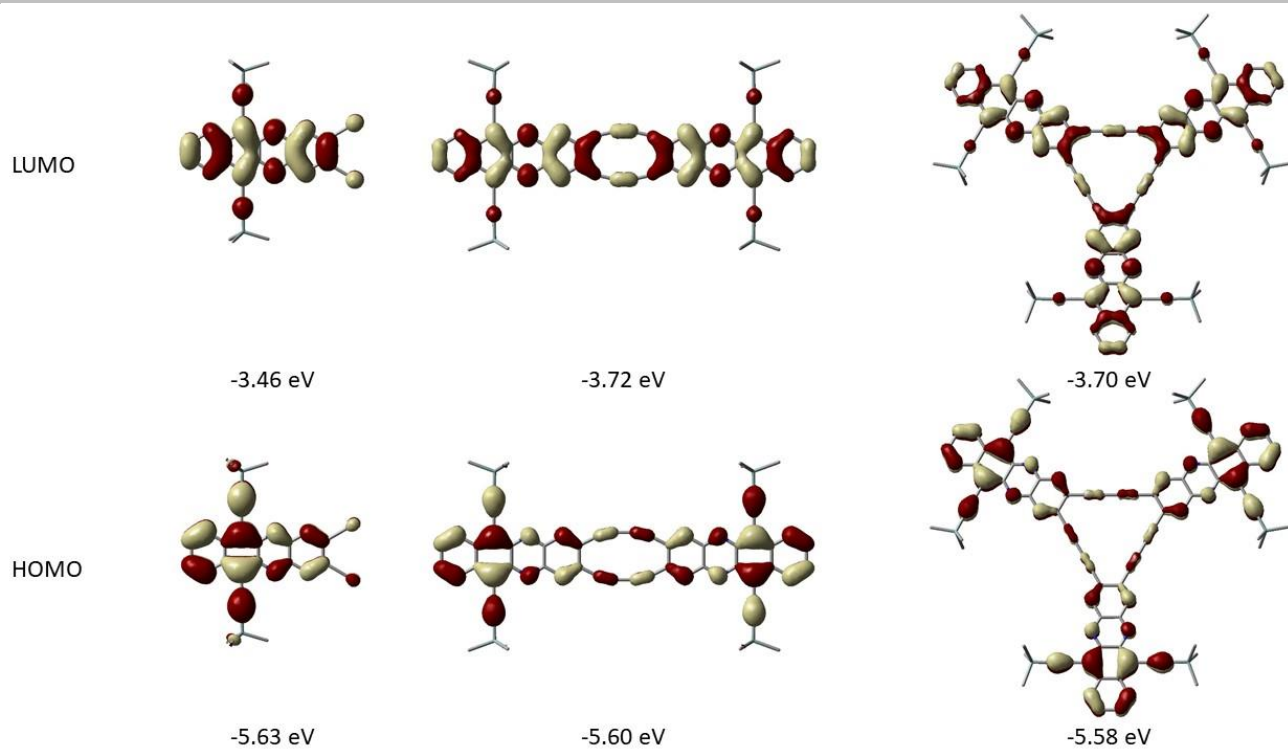

Figure S3. Calculated FMOs of **3c** (left), **3c<sub>2</sub>** (middle) and **3c<sub>3</sub>** (right).

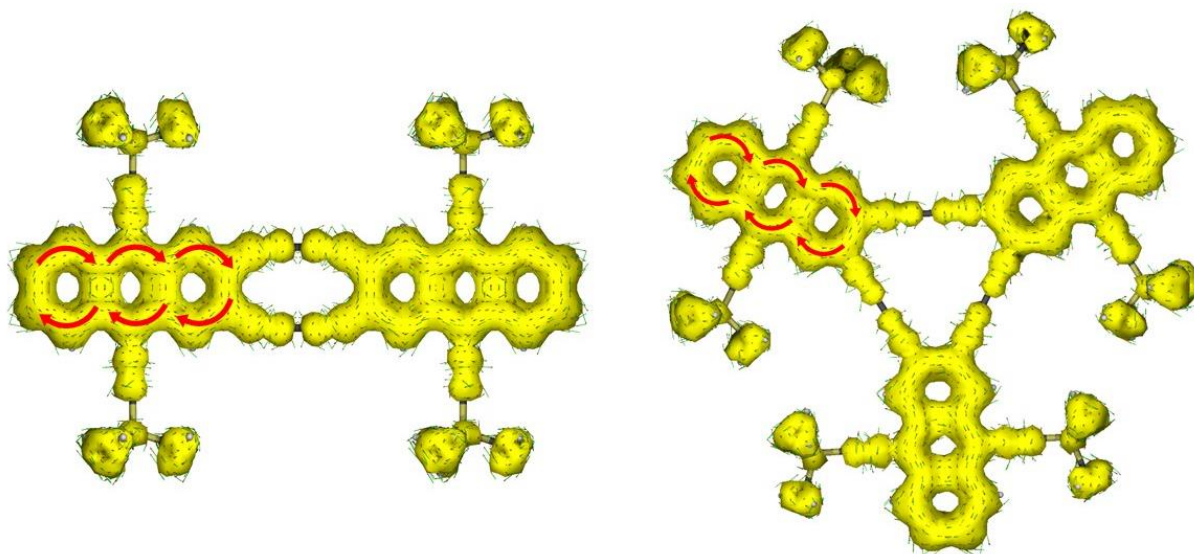

Figure S4 AICD plot of **3a<sub>2</sub>** (left) and **3a<sub>3</sub>** (right). Arrows indicate the ring current flow magnetic field, magnetic field vector is oriented out of plane.

## SUPPORTING INFORMATION

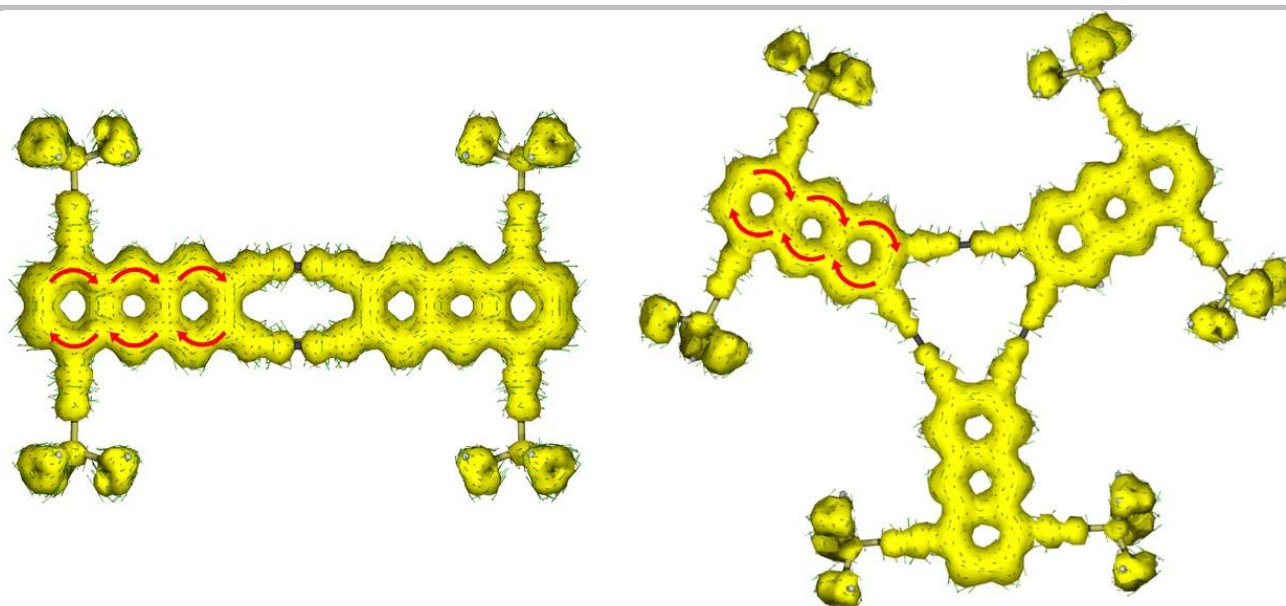

Figure S5. AICD plot of  $3b_2$  (left) and  $3b_3$  (right). Arrows indicate the ring current flow magnetic field, magnetic field vector is oriented out of plane.

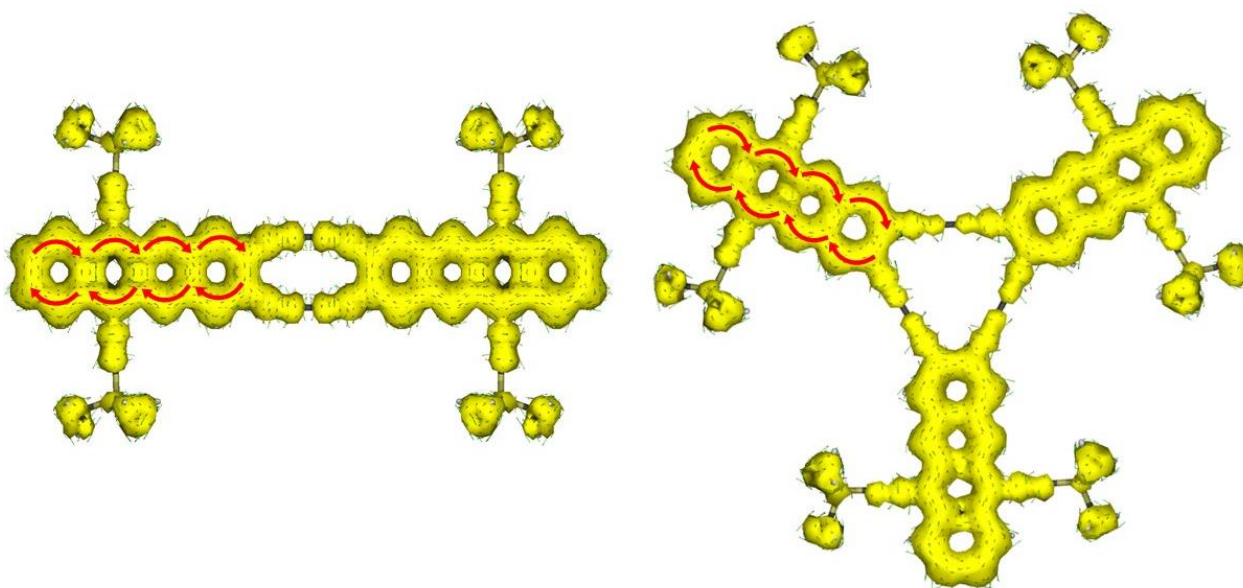

Figure S6. AICD plot of  $3c_2$  (left) and  $3c_3$  (right). Arrows indicate the ring current flow magnetic field, magnetic field vector is oriented out of plane.

## 2.1.2 Calculation of Transfer Integrals

Transfer integrals were determined with the Amsterdam Density Functional (ADF)<sup>S6, S7</sup> using a dimer pair of the crystal structure at the GGA-pw91/DZP level of theory. If there are various neighbor molecules, the transfer integrals off all possible neighbor combinations were calculated.

## SUPPORTING INFORMATION

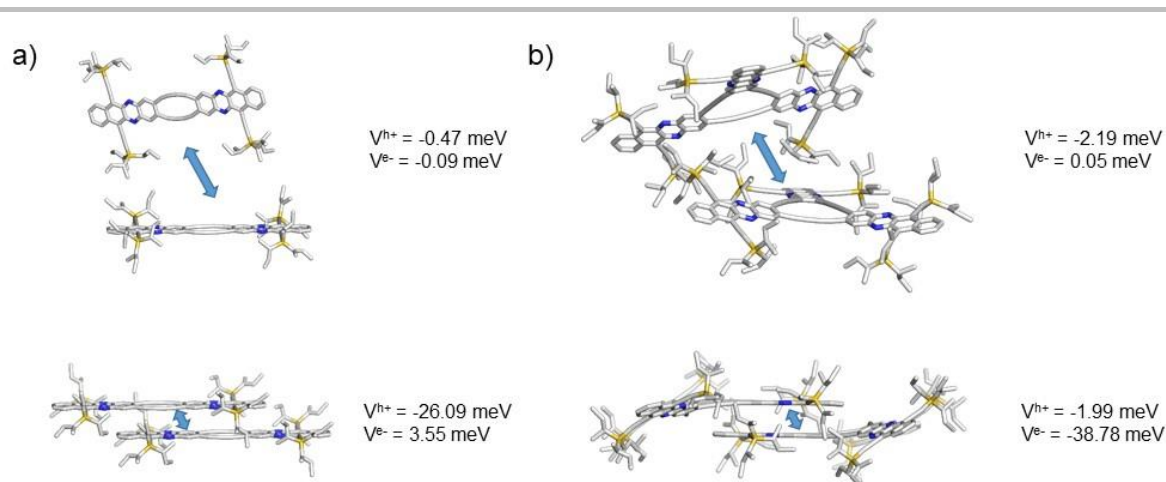

Figure S7. Dimer pairs of a) **3c<sub>2</sub>** and b) **3c<sub>3</sub>** for the calculation of the transfer integrals.

### 2.1.3 Coordinates of the Optimized Geometries

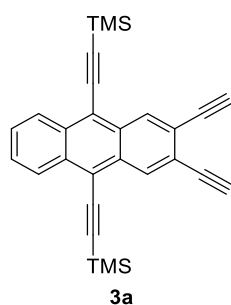

|    |             |             |             |
|----|-------------|-------------|-------------|
| C  | 0.70783400  | -4.27352500 | 0.00025400  |
| C  | -0.70795000 | -4.27350400 | 0.00028600  |
| C  | -1.39646100 | -3.09497100 | 0.00026400  |
| C  | -0.71726900 | -1.84482700 | 0.00020200  |
| C  | 0.71721400  | -1.84484600 | 0.00017000  |
| C  | 1.39637700  | -3.09500800 | 0.00020200  |
| C  | -1.42415600 | -0.61736600 | 0.00015500  |
| C  | -0.71636300 | 0.60800700  | 0.00011900  |
| C  | 0.71638100  | 0.60799100  | 0.00008800  |
| C  | 1.42414100  | -0.61739700 | 0.00009500  |
| C  | -1.39174400 | 1.85457500  | 0.00012500  |
| C  | -0.72190700 | 3.05355300  | 0.00011300  |
| C  | 0.72199500  | 3.05353400  | 0.00008100  |
| C  | 1.39179700  | 1.85454000  | 0.00006500  |
| C  | 2.84279700  | -0.61486300 | 0.00001500  |
| C  | 4.05774300  | -0.60806400 | -0.00005900 |
| C  | -2.84281200 | -0.61479300 | 0.00014600  |
| C  | -4.05775300 | -0.60796400 | 0.00010000  |
| C  | 1.44782600  | 4.27725100  | 0.00007800  |
| C  | 2.06994100  | 5.30621700  | 0.00009700  |
| C  | -1.44770000 | 4.27729000  | 0.00014800  |
| C  | -2.06984000 | 5.30624200  | 0.00014300  |
| Si | 5.89972700  | -0.59003800 | -0.00015900 |
| C  | 6.47334200  | 1.19782900  | 0.00041000  |
| C  | 6.50121000  | -1.47597000 | -1.54360900 |
| C  | 6.50153800  | -1.47706800 | 1.54253800  |
| Si | -5.89974100 | -0.58999400 | -0.00016600 |
| C  | -6.47339600 | 1.19786100  | 0.00028200  |
| C  | -6.50165200 | -1.47700800 | 1.54249600  |



## SUPPORTING INFORMATION

|   |             |             |             |
|---|-------------|-------------|-------------|
| C | -6.50107300 | -1.47597100 | -1.54365100 |
| H | 1.24423900  | -5.21394900 | 0.00027000  |
| H | -1.24438100 | -5.21391300 | 0.00032500  |
| H | -2.47748700 | -3.09115300 | 0.00028700  |
| H | 2.47740000  | -3.09121600 | 0.00017800  |
| H | -2.47208500 | 1.85660200  | 0.00014900  |
| H | 2.47214000  | 1.85653400  | 0.00004400  |
| H | 2.61353800  | 6.21872600  | 0.00016000  |
| H | -2.61344000 | 6.21875000  | 0.00021600  |
| H | 6.11135500  | 1.72932600  | 0.88287800  |
| H | 7.56510500  | 1.25243100  | 0.00070400  |
| H | 6.11186700  | 1.72961100  | -0.88210500 |
| H | 6.15490800  | -2.51132900 | -1.56604500 |
| H | 7.59368400  | -1.48689600 | -1.58145200 |
| H | 6.13851500  | -0.98319300 | -2.44789800 |
| H | 6.13938900  | -0.98468300 | 2.44726200  |
| H | 6.15500800  | -2.51235500 | 1.56456900  |
| H | 7.59402900  | -1.48825200 | 1.57989100  |
| H | -6.11185600 | 1.72960900  | -0.88222500 |
| H | -7.56516300 | 1.25241000  | 0.00045900  |
| H | -6.11153500 | 1.72942500  | 0.88276100  |
| H | -6.15509000 | -2.51228200 | 1.56457700  |
| H | -7.59414600 | -1.48822600 | 1.57977600  |
| H | -6.13958100 | -0.98458800 | 2.44723300  |
| H | -6.13830600 | -0.98317500 | -2.44790300 |
| H | -6.15473800 | -2.51131900 | -1.56606500 |
| H | -7.59354200 | -1.48693100 | -1.58160000 |

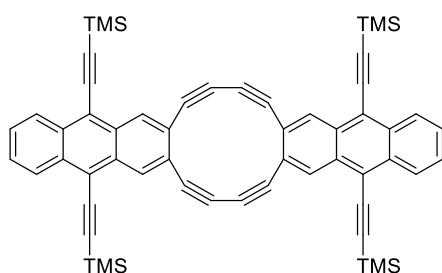

| 3a <sub>2</sub> |             |             |            |
|-----------------|-------------|-------------|------------|
| C               | 10.44612100 | -0.70732400 | 0.00010300 |
| C               | 10.44611700 | 0.70735700  | 0.00009900 |
| C               | 9.26664100  | 1.39602900  | 0.00013000 |
| C               | 8.01791300  | 0.71667500  | 0.00016400 |
| C               | 8.01791700  | -0.71665400 | 0.00016800 |
| C               | 9.26664800  | -1.39600100 | 0.00013700 |
| C               | 6.78836800  | 1.42370700  | 0.00019300 |
| C               | 5.56425100  | 0.71730200  | 0.00020300 |
| C               | 5.56425400  | -0.71729300 | 0.00020800 |
| C               | 6.78837400  | -1.42369200 | 0.00020300 |
| C               | 4.31823100  | 1.39801800  | 0.00019600 |
| C               | 3.11981000  | 0.73138800  | 0.00018600 |
| C               | 3.11981300  | -0.73139000 | 0.00018800 |
| C               | 4.31823700  | -1.39801400 | 0.00020200 |
| C               | 1.86471900  | -1.38414600 | 0.00016000 |
| C               | 0.68039200  | -1.65821000 | 0.00012000 |
| C               | 1.86471400  | 1.38413900  | 0.00015700 |
| C               | 0.68038600  | 1.65820300  | 0.00011700 |
| C               | -0.67372500 | 1.65821400  | 0.00006300 |
| C               | -1.85810000 | 1.38430100  | 0.00000900 |
| C               | -0.67371800 | -1.65820800 | 0.00006500 |

## SUPPORTING INFORMATION

---

|    |              |             |             |
|----|--------------|-------------|-------------|
| C  | -1.85809200  | -1.38428700 | 0.00000900  |
| C  | -3.11310900  | -0.73138300 | -0.00005700 |
| C  | -3.11311400  | 0.73139100  | -0.00005800 |
| C  | -4.31156900  | 1.39786000  | -0.00012500 |
| C  | -5.55764700  | 0.71732300  | -0.00019600 |
| C  | -5.55764300  | -0.71733000 | -0.00019600 |
| C  | -4.31156000  | -1.39786000 | -0.00012500 |
| C  | -6.78175300  | 1.42367000  | -0.00026500 |
| C  | -8.01131500  | 0.71661200  | -0.00033500 |
| C  | -8.01131000  | -0.71663500 | -0.00033700 |
| C  | -6.78174400  | -1.42368600 | -0.00026800 |
| C  | -9.25996500  | 1.39613100  | -0.00041000 |
| C  | -10.43942200 | 0.70732500  | -0.00048000 |
| C  | -10.43941800 | -0.70736300 | -0.00047900 |
| C  | -9.25995600  | -1.39616200 | -0.00041000 |
| C  | 6.78673800   | 2.84246600  | 0.00021200  |
| C  | 6.78083600   | 4.05738700  | 0.00023600  |
| C  | 6.78675200   | -2.84245200 | 0.00023600  |
| C  | 6.78085500   | -4.05737200 | 0.00027300  |
| C  | -6.78125100  | -2.84242100 | -0.00027600 |
| C  | -6.77896800  | -4.05734700 | -0.00028500 |
| C  | -6.78126900  | 2.84240700  | -0.00026400 |
| C  | -6.77899200  | 4.05733200  | -0.00026500 |
| Si | 6.76379600   | 5.89998600  | 0.00030600  |
| C  | 4.97635600   | 6.47415100  | -0.00272000 |
| C  | 7.64829300   | 6.49983900  | 1.54508900  |
| C  | 7.65357500   | 6.50000400  | -1.54137800 |
| Si | 6.76382800   | -5.89997200 | 0.00037500  |
| C  | 4.97639500   | -6.47414900 | -0.00405500 |
| C  | 7.65483600   | -6.50002000 | -1.54058800 |
| C  | 7.64710100   | -6.49978200 | 1.54587500  |
| Si | -6.77167300  | -5.89994700 | -0.00031000 |
| C  | -5.87923400  | -6.48930400 | 1.54328800  |
| C  | -8.55348000  | -6.49491300 | -0.00015500 |
| C  | -5.87951700  | -6.48926200 | -1.54408700 |
| Si | -6.77171700  | 5.89993200  | -0.00026000 |
| C  | -8.55353000  | 6.49487900  | -0.00213000 |
| C  | -5.88104900  | 6.48927800  | 1.54436500  |
| C  | -5.87780300  | 6.48927600  | -1.54300800 |
| H  | 11.38631200  | -1.24408800 | 0.00007700  |
| H  | 11.38630600  | 1.24412600  | 0.00007100  |
| H  | 9.26280700   | 2.47704300  | 0.00012600  |
| H  | 9.26281900   | -2.47701600 | 0.00014000  |
| H  | 4.32066800   | 2.47849000  | 0.00018700  |
| H  | 4.32068000   | -2.47848700 | 0.00019400  |
| H  | -4.31415000  | 2.47828100  | -0.00012600 |
| H  | -4.31413400  | -2.47828100 | -0.00012600 |
| H  | -9.25628300  | 2.47717900  | -0.00041200 |
| H  | -11.37959200 | 1.24413000  | -0.00053700 |
| H  | -11.37958500 | -1.24417400 | -0.00053400 |
| H  | -9.25626700  | -2.47720900 | -0.00041000 |
| H  | 4.92249000   | 7.56594300  | -0.00281500 |
| H  | 4.44569100   | 6.11324600  | -0.88613100 |
| H  | 4.44271600   | 6.11326300  | 0.87890600  |
| H  | 7.65998700   | 7.59228100  | 1.58332100  |
| H  | 8.68335200   | 6.15275500  | 1.56884000  |
| H  | 7.15392900   | 6.13734800  | 2.44858600  |
| H  | 7.16237400   | 6.13751300  | -2.44659900 |
| H  | 7.66528500   | 7.59244900  | -1.57951100 |
| H  | 8.68874900   | 6.15303800  | -1.56157000 |

## SUPPORTING INFORMATION

|   |             |             |             |
|---|-------------|-------------|-------------|
| H | 4.92253600  | -7.56594100 | -0.00415900 |
| H | 4.44205200  | -6.11324000 | 0.87713600  |
| H | 4.44642800  | -6.11327300 | -0.88789800 |
| H | 7.66660500  | -7.59246600 | -1.57867200 |
| H | 8.69001700  | -6.15302900 | -1.55997800 |
| H | 7.16433700  | -6.13757400 | -2.44620700 |
| H | 8.68213300  | -6.15267400 | 1.57044600  |
| H | 7.15200900  | -6.13728400 | 2.44897000  |
| H | 7.65878600  | -7.59222300 | 1.58413500  |
| H | -5.85429300 | -7.58154400 | 1.58113000  |
| H | -4.84844500 | -6.12983600 | 1.56566100  |
| H | -6.37661300 | -6.13289100 | 2.44756300  |
| H | -8.59534800 | -7.58720000 | -0.00014900 |
| H | -9.08908700 | -6.14001600 | -0.88311700 |
| H | -9.08893600 | -6.14001100 | 0.88289600  |
| H | -6.37707100 | -6.13283700 | -2.44826200 |
| H | -4.84873700 | -6.12977900 | -1.56664700 |
| H | -5.85456800 | -7.58150100 | -1.58195700 |
| H | -8.59540900 | 7.58716500  | -0.00226200 |
| H | -9.08816000 | 6.13989800  | -0.88564900 |
| H | -9.08995500 | 6.14005000  | 0.88036400  |
| H | -5.85609900 | 7.58151800  | 1.58221900  |
| H | -4.85030500 | 6.12976000  | 1.56793900  |
| H | -6.37949400 | 6.13290200  | 2.44806800  |
| H | -4.84698200 | 6.12984100  | -1.56438000 |
| H | -6.37430000 | 6.13282900  | -2.44775500 |
| H | -5.85285900 | 7.58151700  | -1.58085200 |

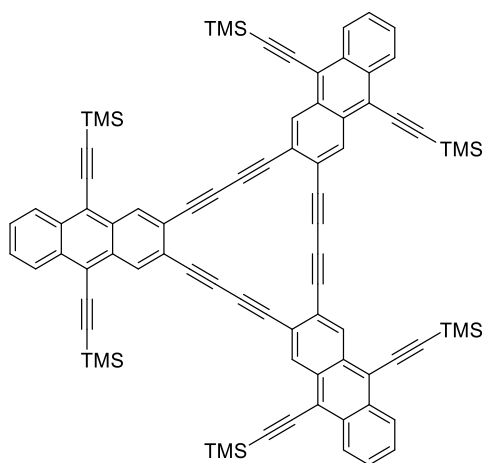 $3a_3$ 

|   |             |             |             |
|---|-------------|-------------|-------------|
| C | 11.48815200 | -1.45424700 | -0.01158400 |
| C | 11.58060400 | -0.04188900 | -0.01540100 |
| C | 10.44912300 | 0.72229800  | -0.01516700 |
| C | 9.15781100  | 0.12609900  | -0.01119200 |
| C | 9.06414200  | -1.30500500 | -0.00736600 |
| C | 10.26672400 | -2.06443900 | -0.00764600 |
| C | 7.97848800  | 0.91205400  | -0.01079800 |
| C | 6.70947100  | 0.28659300  | -0.00712300 |
| C | 6.61579500  | -1.14493800 | -0.00349900 |
| C | 7.79246800  | -1.93051300 | -0.00334600 |
| C | 5.51131800  | 1.04245500  | -0.00700100 |
| C | 4.26732700  | 0.45400900  | -0.00387700 |
| C | 4.17265300  | -0.99271200 | -0.00069100 |
| C | 5.32938800  | -1.73824000 | -0.00041200 |

## SUPPORTING INFORMATION

---

|    |             |              |             |
|----|-------------|--------------|-------------|
| C  | 7.70105300  | -3.34598900  | 0.00109400  |
| C  | 7.62766800  | -4.55873500  | 0.00512200  |
| C  | 8.07251500  | 2.32736600   | -0.01406600 |
| C  | 8.15719900  | 3.53938100   | -0.01666400 |
| C  | 2.91047900  | -1.62679200  | 0.00127600  |
| C  | 3.09811100  | 1.24652700   | -0.00338800 |
| C  | 2.09005300  | 1.92405500   | -0.00249000 |
| C  | 1.82366000  | -2.16904300  | 0.00196600  |
| C  | -7.00156500 | -9.23128200  | 0.00229200  |
| C  | -5.82299600 | -10.01504700 | 0.00749400  |
| C  | -4.59677900 | -9.41463200  | 0.00871000  |
| C  | -4.47028200 | -7.99798000  | 0.00483100  |
| C  | -5.66455900 | -7.20378800  | -0.00045800 |
| C  | -6.92211600 | -7.86825900  | -0.00155600 |
| C  | -3.20144800 | -7.36689500  | 0.00596700  |
| C  | -3.11166900 | -5.95487600  | 0.00216800  |
| C  | -4.30616800 | -5.16050300  | -0.00334800 |
| C  | -5.57342900 | -5.78948100  | -0.00495500 |
| C  | -1.85935900 | -5.29264900  | 0.00345000  |
| C  | -1.74975800 | -3.92079700  | 0.00064100  |
| C  | -2.95693600 | -3.11797700  | -0.00404600 |
| C  | -4.17963200 | -3.74953500  | -0.00640600 |
| C  | -6.75532100 | -5.00522300  | -0.01134900 |
| C  | -7.76981000 | -4.33668400  | -0.01734000 |
| C  | -2.01985400 | -8.15159500  | 0.01119800  |
| C  | -1.00696600 | -8.82256400  | 0.01521200  |
| C  | -2.87733800 | -1.70770800  | -0.00572200 |
| C  | -0.47952600 | -3.30298900  | 0.00188300  |
| C  | 0.61143400  | -2.76911200  | 0.00227600  |
| C  | -2.80437500 | -0.49530400  | -0.00607100 |
| C  | -4.49251900 | 10.68149200  | 0.03258800  |
| C  | -5.76154200 | 10.05463700  | 0.03085900  |
| C  | -5.85677600 | 8.69265000   | 0.02343700  |
| C  | -4.69435000 | 7.87308600   | 0.01739500  |
| C  | -3.40840400 | 8.50826000   | 0.01939700  |
| C  | -3.35299000 | 9.92944400   | 0.02696500  |
| C  | -4.78467700 | 6.45884200   | 0.00999400  |
| C  | -3.60805300 | 5.67313900   | 0.00585000  |
| C  | -2.32186800 | 6.30841100   | 0.00723900  |
| C  | -2.23052000 | 7.72030300   | 0.01353400  |
| C  | -3.66278100 | 4.25759200   | 0.00107300  |
| C  | -2.53079400 | 3.47500000   | -0.00167200 |
| C  | -1.23096300 | 4.11697700   | -0.00061800 |
| C  | -1.16440500 | 5.49161300   | 0.00319900  |
| C  | -0.95848200 | 8.34787900   | 0.01356600  |
| C  | 0.13143100  | 8.88477200   | 0.01304500  |
| C  | -6.05669500 | 5.83122000   | 0.00639300  |
| C  | -7.14704200 | 5.29520900   | 0.00274900  |
| C  | -0.05008800 | 3.34191500   | -0.00205400 |
| C  | -2.63260700 | 2.06616600   | -0.00436300 |
| C  | -2.71692000 | 0.85450600   | -0.00562200 |
| C  | 0.96390100  | 2.67330400   | -0.00236200 |
| Si | 8.28857200  | 5.37660100   | -0.02032600 |
| C  | 10.11058400 | 5.83414500   | -0.00266600 |
| C  | 7.42922600  | 6.03699200   | 1.51318600  |
| C  | 7.46127500  | 6.02905300   | -1.57470600 |
| Si | 7.52703600  | -6.39784900  | 0.01084200  |
| C  | 6.58000300  | -6.93606300  | 1.54048500  |
| C  | 9.27667100  | -7.08115800  | 0.04498400  |
| C  | 6.63519500  | -6.94959500  | -1.54683700 |

## SUPPORTING INFORMATION

---

|    |              |              |             |
|----|--------------|--------------|-------------|
| Si | 0.53330700   | -9.83238600  | 0.01987100  |
| C  | 0.45152400   | -11.04548600 | -1.41190300 |
| C  | 0.63576700   | -10.75163800 | 1.65472800  |
| C  | 1.99784100   | -8.67449300  | -0.17882400 |
| Si | -9.31155000  | -3.32909500  | -0.02599800 |
| C  | -9.27790900  | -2.20453600  | -1.52943400 |
| C  | -9.37025700  | -2.31787400  | 1.55518400  |
| C  | -10.77729200 | -4.50116700  | -0.11165000 |
| Si | -8.79915300  | 4.48110800   | -0.00765700 |
| C  | -8.74369000  | 3.01402900   | 1.16288800  |
| C  | -9.17136200  | 3.91504100   | -1.75936200 |
| C  | -10.07698900 | 5.73355300   | 0.56444000  |
| Si | 1.78578500   | 9.69428900   | 0.01175600  |
| C  | 3.09674200   | 8.35760000   | -0.12749800 |
| C  | 1.98150000   | 10.64667000  | 1.61890800  |
| C  | 1.87359500   | 10.86079600  | -1.45799200 |
| H  | 12.39128200  | -2.05122700  | -0.01177400 |
| H  | 12.55384400  | 0.43226400   | -0.01847000 |
| H  | 10.51623600  | 1.80120300   | -0.01801600 |
| H  | 10.19266300  | -3.14289900  | -0.00469200 |
| H  | 5.58106100   | 2.12056800   | -0.00959800 |
| H  | 5.25809500   | -2.81623400  | 0.00177200  |
| H  | -7.96910600  | -9.71695500  | 0.00126100  |
| H  | -5.89679000  | -11.09512900 | 0.01045800  |
| H  | -3.69464800  | -10.01017300 | 0.01267300  |
| H  | -7.82030400  | -7.26680400  | -0.00574300 |
| H  | -0.95924400  | -5.89011500  | 0.00659200  |
| H  | -5.07876300  | -3.15060800  | -0.01019000 |
| H  | -4.42780300  | 11.76214300  | 0.03845400  |
| H  | -6.65911800  | 10.65990800  | 0.03569300  |
| H  | -6.82440500  | 8.21074500   | 0.02264000  |
| H  | -2.38221500  | 10.40493800  | 0.02840500  |
| H  | -4.63102600  | 3.77841300   | 0.00033500  |
| H  | -0.19532100  | 5.96915600   | 0.00395300  |
| H  | 10.62641300  | 5.43755300   | -0.87956300 |
| H  | 10.23578100  | 6.91999700   | -0.00377100 |
| H  | 10.60835500  | 5.44134500   | 0.88628400  |
| H  | 6.37466400   | 5.75478800   | 1.52767600  |
| H  | 7.48514100   | 7.12815800   | 1.54725900  |
| H  | 7.89155700   | 5.64829400   | 2.42267000  |
| H  | 7.94010400   | 5.63283200   | -2.47232900 |
| H  | 6.40630000   | 5.75001700   | -1.60799200 |
| H  | 7.52134000   | 7.11979400   | -1.61498000 |
| H  | 5.56930600   | -6.52323600  | 1.54501900  |
| H  | 6.49781900   | -8.02537900  | 1.58012300  |
| H  | 7.08070800   | -6.60349700  | 2.45190100  |
| H  | 9.84421700   | -6.75867500  | -0.83036000 |
| H  | 9.26408500   | -8.17410800  | 0.05126700  |
| H  | 9.81400400   | -6.74804900  | 0.93527100  |
| H  | 6.55695100   | -8.03939000  | -1.58107700 |
| H  | 5.62429700   | -6.53952900  | -1.58991200 |
| H  | 7.16684300   | -6.62264500  | -2.44263300 |
| H  | 0.37217600   | -10.52324100 | -2.36737400 |
| H  | 1.34965100   | -11.66785900 | -1.44228100 |
| H  | -0.41162300  | -11.70801500 | -1.32081900 |
| H  | 0.66357100   | -10.05707800 | 2.49661300  |
| H  | 1.53860200   | -11.36658300 | 1.69589300  |
| H  | -0.22446500  | -11.40965300 | 1.79333800  |
| H  | 1.93741900   | -8.11768600  | -1.11603000 |
| H  | 2.04377200   | -7.95148900  | 0.63803100  |

## SUPPORTING INFORMATION

|   |              |             |             |
|---|--------------|-------------|-------------|
| H | 2.93546100   | -9.23623700 | -0.18225000 |
| H | -9.22611800  | -2.78308700 | -2.45384800 |
| H | -10.17839300 | -1.58611800 | -1.56973800 |
| H | -8.41379300  | -1.53761400 | -1.50476300 |
| H | -9.36438800  | -2.96279400 | 2.43611000  |
| H | -10.27721400 | -1.70867300 | 1.59040800  |
| H | -8.51242500  | -1.64641900 | 1.62774000  |
| H | -11.71723400 | -3.94336200 | -0.12343300 |
| H | -10.74125400 | -5.11454100 | -1.01429200 |
| H | -10.79793700 | -5.17183000 | 0.74981800  |
| H | -8.50127700  | 3.32883900  | 2.17976700  |
| H | -9.71072600  | 2.50514600  | 1.19011900  |
| H | -7.99129700  | 2.28716000  | 0.85039200  |
| H | -9.17922700  | 4.75801700  | -2.45316400 |
| H | -10.14947100 | 3.42942100  | -1.80906400 |
| H | -8.42385400  | 3.20106700  | -2.11079100 |
| H | -11.07466700 | 5.28726000  | 0.57939300  |
| H | -9.85539600  | 6.09257500  | 1.57147200  |
| H | -10.10869300 | 6.59883500  | -0.10091700 |
| H | 2.97870600   | 7.78262100  | -1.04811000 |
| H | 4.09710600   | 8.79793700  | -0.13304800 |
| H | 3.04199200   | 7.66131400  | 0.71172100  |
| H | 1.20700300   | 11.40909500 | 1.72407300  |
| H | 2.95239100   | 11.14766100 | 1.65521800  |
| H | 1.91415600   | 9.98143700  | 2.48198800  |
| H | 2.84327300   | 11.36418200 | -1.49371200 |
| H | 1.73997900   | 10.32175400 | -2.39795800 |
| H | 1.09970400   | 11.62894700 | -1.40077100 |

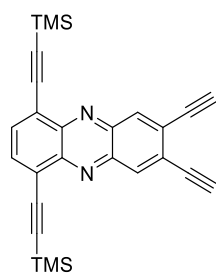

3b

|   |             |             |             |
|---|-------------|-------------|-------------|
| C | 0.70355000  | -2.98815400 | -0.00004400 |
| C | -0.70355800 | -2.98815200 | -0.00004400 |
| C | -1.43489800 | -1.81872900 | -0.00003000 |
| C | -0.72198900 | -0.56549700 | -0.00001400 |
| C | 0.72198700  | -0.56549900 | -0.00001600 |
| C | 1.43489200  | -1.81873200 | -0.00003100 |
| N | -1.40812900 | 0.57525100  | 0.00000100  |
| C | -0.71762100 | 1.71761800  | 0.00001500  |
| C | 0.71762400  | 1.71761600  | 0.00001400  |
| N | 1.40812900  | 0.57524800  | -0.00000200 |
| C | -1.40710500 | 2.95716600  | 0.00003300  |
| C | -0.72621700 | 4.14899600  | 0.00004900  |
| C | 0.72622500  | 4.14899500  | 0.00004800  |
| C | 1.40711000  | 2.95716300  | 0.00003100  |
| C | 2.85242100  | -1.84358400 | -0.00003500 |
| C | 4.06451000  | -1.89710600 | -0.00003900 |
| C | -2.85242600 | -1.84357700 | -0.00003100 |
| C | -4.06451500 | -1.89709700 | -0.00003100 |
| C | 1.44094900  | 5.37897700  | 0.00006600  |
| C | 2.05553300  | 6.41200500  | 0.00007700  |

## SUPPORTING INFORMATION

|    |             |             |             |
|----|-------------|-------------|-------------|
| C  | -1.44093800 | 5.37898000  | 0.00006600  |
| C  | -2.05551500 | 6.41201200  | 0.00009100  |
| Si | 5.90479300  | -1.92934200 | -0.00001500 |
| C  | 6.51059200  | -1.04579500 | -1.54279200 |
| C  | 6.47014100  | -3.72095100 | -0.00187300 |
| C  | 6.51049400  | -1.04903500 | 1.54465400  |
| Si | -5.90479800 | -1.92933200 | -0.00002400 |
| C  | -6.51053800 | -1.04834400 | -1.54428900 |
| C  | -6.51055700 | -1.04646800 | 1.54316000  |
| C  | -6.47014900 | -3.72094200 | 0.00105200  |
| H  | 1.22939800  | -3.93333700 | -0.00005500 |
| H  | -1.22940900 | -3.93333400 | -0.00005600 |
| H  | -2.48799500 | 2.93835600  | 0.00003400  |
| H  | 2.48800000  | 2.93835100  | 0.00002900  |
| H  | 2.59381000  | 7.32793000  | 0.00000100  |
| H  | -2.59368900 | 7.32799800  | 0.00030000  |
| H  | 6.16231000  | -0.01125900 | -1.56451300 |
| H  | 7.60313100  | -1.03507000 | -1.57907400 |
| H  | 6.14885000  | -1.53856500 | -2.44752000 |
| H  | 6.10454700  | -4.25103100 | 0.88007900  |
| H  | 7.56150700  | -3.78291600 | -0.00189000 |
| H  | 6.10462300  | -4.24917900 | -0.88496700 |
| H  | 6.16214400  | -0.01457100 | 1.56856400  |
| H  | 6.14876700  | -1.54375100 | 2.44832600  |
| H  | 7.60303300  | -1.03831200 | 1.58098300  |
| H  | -6.14867900 | -1.54255500 | -2.44818400 |
| H  | -7.60307500 | -1.03776800 | -1.58068000 |
| H  | -6.16234200 | -0.01381500 | -1.56766300 |
| H  | -6.14895500 | -1.53975500 | 2.44766400  |
| H  | -7.60309700 | -1.03558300 | 1.57937600  |
| H  | -6.16210700 | -0.01200100 | 1.56542600  |
| H  | -7.56151500 | -3.78290400 | 0.00119800  |
| H  | -6.10468500 | -4.25059700 | -0.88120900 |
| H  | -6.10450400 | -4.24959600 | 0.88383800  |

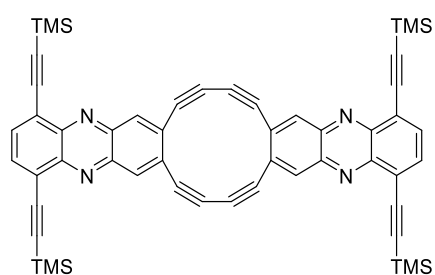

| 3b <sub>2</sub> |              |             |             |
|-----------------|--------------|-------------|-------------|
| C               | -10.23586300 | -0.70156400 | 0.02435500  |
| C               | -10.23469800 | 0.70436300  | 0.00341700  |
| C               | -9.06409000  | 1.43567700  | -0.00543300 |
| C               | -7.81321800  | 0.72111600  | 0.00685900  |
| C               | -7.81457000  | -0.72190100 | 0.02521400  |
| C               | -9.06636900  | -1.43457000 | 0.03576300  |
| N               | -6.66943400  | 1.40581100  | 0.00103600  |
| C               | -5.52866800  | 0.71587600  | 0.01011100  |
| C               | -5.52992000  | -0.72103800 | 0.02386000  |
| N               | -6.67204600  | -1.40879300 | 0.03244200  |
| C               | -4.28910700  | 1.40978900  | 0.00615400  |
| C               | -3.09819000  | 0.73087200  | 0.01241700  |
| C               | -3.09960600  | -0.74042800 | 0.02120200  |

## SUPPORTING INFORMATION

---

|    |              |             |             |
|----|--------------|-------------|-------------|
| C  | -4.29168600  | -1.41726800 | 0.02773700  |
| C  | -1.84117700  | -1.38625100 | 0.02150600  |
| C  | -0.65755500  | -1.66101100 | 0.01835100  |
| C  | -1.83840100  | 1.37412500  | 0.01080000  |
| C  | -0.65406400  | 1.64588500  | 0.01201200  |
| C  | 0.69971700   | 1.64433500  | 0.01339200  |
| C  | 1.88340000   | 1.36974800  | 0.01470500  |
| C  | 0.69619000   | -1.66264100 | 0.01419400  |
| C  | 1.88046000   | -1.39069000 | 0.00996800  |
| C  | 3.14023500   | -0.74748300 | 0.00768400  |
| C  | 3.14183500   | 0.72383300  | 0.01319700  |
| C  | 4.33413000   | 1.40035500  | 0.01600700  |
| C  | 5.57227900   | 0.70393200  | 0.01145000  |
| C  | 5.57066700   | -0.73297400 | 0.00128500  |
| C  | 4.33099800   | -1.42664300 | 0.00095500  |
| N  | 6.71445100   | 1.39155800  | 0.01633200  |
| C  | 7.85681000   | 0.70449200  | 0.00950300  |
| C  | 7.85516400   | -0.73869400 | -0.00488700 |
| N  | 6.71125200   | -1.42317500 | -0.00763100 |
| C  | 9.10902400   | 1.41670600  | 0.01651500  |
| C  | 10.27816700  | 0.68311000  | 0.00637900  |
| C  | 10.27654800  | -0.72285200 | -0.01033700 |
| C  | 9.10571000   | -1.45377600 | -0.01640300 |
| C  | 9.12848300   | -2.87129900 | -0.03520600 |
| C  | 9.17850900   | -4.08369500 | -0.05365200 |
| C  | 9.13516200   | 2.83417100  | 0.03496900  |
| C  | 9.18817100   | 4.04644700  | 0.05282600  |
| C  | -9.09114600  | -2.85202200 | 0.05921300  |
| C  | -9.08736700  | 2.85312300  | -0.02758900 |
| C  | -9.13772100  | 4.06546300  | -0.04846100 |
| C  | -9.14113600  | -4.06437100 | 0.07992500  |
| Si | 9.21245300   | 5.89495800  | 0.08293200  |
| C  | 9.02951500   | 6.42128600  | -1.74401500 |
| C  | 10.90093800  | 6.36057700  | 0.84365500  |
| C  | 7.72304400   | 6.38410300  | 1.17173800  |
| C  | 10.23793900  | 5.98727900  | -2.58970100 |
| C  | 8.69631400   | 7.90202900  | -1.98507200 |
| C  | 11.01697600  | 5.89677500  | 2.30497600  |
| C  | 11.31869500  | 7.83279300  | 0.70320900  |
| C  | 6.39013700   | 5.95142700  | 0.53879200  |
| C  | 7.66889300   | 7.85347000  | 1.61848100  |
| Si | 9.19828400   | -5.93225100 | -0.08487700 |
| C  | 7.70657600   | -6.41715300 | -1.17243600 |
| C  | 9.01590600   | -6.45922700 | 1.74194000  |
| C  | 10.88487600  | -6.40144900 | -0.84759800 |
| C  | 6.37537700   | -5.98160500 | -0.53787000 |
| C  | 7.64838500   | -7.88612900 | -1.61994700 |
| C  | 10.22620000  | -6.02861700 | 2.58668100  |
| C  | 8.67940300   | -7.93931500 | 1.98243800  |
| C  | 11.00053400  | -5.93703700 | -2.30875200 |
| C  | 11.29930900  | -7.87473500 | -0.70848600 |
| Si | -9.17377200  | -5.90992900 | 0.15961200  |
| C  | -10.27156300 | -6.29371500 | 1.67780800  |
| C  | -7.36724800  | -6.46292600 | 0.45663600  |
| C  | -9.82333100  | -6.54958800 | -1.52381800 |
| C  | -10.20462200 | -7.73169400 | 2.21516900  |
| C  | -11.73160800 | -5.85184700 | 1.48928400  |
| C  | -6.35961500  | -5.63388300 | -0.35720300 |
| C  | -7.10992300  | -7.96224500 | 0.23035600  |
| C  | -10.87067000 | -5.63780000 | -2.18280500 |



## SUPPORTING INFORMATION

---

|    |              |             |             |
|----|--------------|-------------|-------------|
| C  | -10.33116700 | -8.00151300 | -1.48744300 |
| Si | -9.15781000  | 5.91402900  | -0.08264500 |
| C  | -10.84503500 | 6.38179300  | -0.84477000 |
| C  | -7.66698300  | 6.39743900  | -1.17204300 |
| C  | -8.97408600  | 6.44362900  | 1.74327600  |
| C  | -10.96168200 | 5.91531800  | -2.30518900 |
| C  | -11.25959600 | 7.85520800  | -0.70739100 |
| C  | -6.33524200  | 5.96303000  | -0.53783300 |
| C  | -7.60935400  | 7.86576600  | -1.62176800 |
| C  | -10.18369400 | 6.01416700  | 2.58958200  |
| C  | -8.63751200  | 7.92409800  | 1.98134500  |
| H  | -11.18148600 | -1.22649000 | 0.03176900  |
| H  | -11.17942100 | 1.23092100  | -0.00567800 |
| H  | -4.31072900  | 2.49072600  | -0.00207800 |
| H  | -4.31509000  | -2.49815800 | 0.03487500  |
| H  | 4.35792600   | 2.48126700  | 0.02152000  |
| H  | 4.35236800   | -2.50760300 | -0.00470600 |
| H  | 11.22392500  | 1.20787900  | 0.01132300  |
| H  | 11.22109200  | -1.24975900 | -0.01865500 |
| H  | 8.16882700   | 5.83498700  | -2.08890900 |
| H  | 11.61343900  | 5.76478700  | 0.25924500  |
| H  | 7.86154700   | 5.77586500  | 2.07431700  |
| H  | 10.45567100  | 4.92387300  | -2.47452100 |
| H  | 10.05130600  | 6.17360000  | -3.65170600 |
| H  | 11.13953000  | 6.54299900  | -2.31950800 |
| H  | 7.77228500   | 8.20387900  | -1.49023500 |
| H  | 8.56821200   | 8.09251000  | -3.05521400 |
| H  | 9.48960400   | 8.56527200  | -1.63427700 |
| H  | 10.77270800  | 4.83894300  | 2.41867900  |
| H  | 12.03575200  | 6.04395800  | 2.67642100  |
| H  | 10.35088200  | 6.46321600  | 2.96069100  |
| H  | 11.35794800  | 8.15453300  | -0.33836400 |
| H  | 12.31543700  | 7.98708100  | 1.12819600  |
| H  | 10.63852100  | 8.50523600  | 1.22995100  |
| H  | 6.39393000   | 4.89386900  | 0.26893500  |
| H  | 5.56306700   | 6.11513200  | 1.23653600  |
| H  | 6.16788100   | 6.52699500  | -0.36353500 |
| H  | 8.56088800   | 8.15154300  | 2.17136300  |
| H  | 6.80967000   | 8.01829200  | 2.27603300  |
| H  | 7.56136300   | 8.53704000  | 0.77385800  |
| H  | 7.84562800   | -5.80874100 | -2.07481400 |
| H  | 8.15696400   | -5.87107400 | 2.08803000  |
| H  | 11.59937500  | -5.80770700 | -0.26354100 |
| H  | 6.38201100   | -4.92421600 | -0.26740900 |
| H  | 5.54719200   | -6.14290200 | -1.23485000 |
| H  | 6.15266900   | -6.55715400 | 0.36435900  |
| H  | 8.53914900   | -8.18610100 | -2.17378000 |
| H  | 6.78817300   | -8.04845400 | -2.27682500 |
| H  | 7.53990800   | -8.56990000 | -0.77560500 |
| H  | 10.44633900  | -4.96566000 | 2.47194000  |
| H  | 10.04019400  | -6.21515400 | 3.64875800  |
| H  | 11.12619600  | -6.58630700 | 2.31523500  |
| H  | 7.75417300   | -8.23866600 | 1.48832700  |
| H  | 8.55189900   | -8.13013700 | 3.05259200  |
| H  | 9.47076500   | -8.60423800 | 1.63046700  |
| H  | 10.75864600  | -4.87856400 | -2.42157300 |
| H  | 12.01858300  | -6.08640000 | -2.68132000 |
| H  | 10.33244300  | -6.50151000 | -2.96413000 |
| H  | 11.33888200  | -8.19723000 | 0.33284200  |
| H  | 12.29524900  | -8.03109700 | -1.13459300 |

## SUPPORTING INFORMATION

---

|   |              |             |             |
|---|--------------|-------------|-------------|
| H | 10.61702300  | -8.54524700 | -1.23495800 |
| H | -9.83639300  | -5.64270500 | 2.44762000  |
| H | -7.18593800  | -6.24950000 | 1.51823600  |
| H | -8.93325400  | -6.53113400 | -2.16669000 |
| H | -9.18861200  | -8.02597700 | 2.48183300  |
| H | -10.81610200 | -7.82685400 | 3.11794300  |
| H | -10.58331600 | -8.45815800 | 1.49314400  |
| H | -11.80593400 | -4.81721700 | 1.14999300  |
| H | -12.28190800 | -5.93146400 | 2.43189400  |
| H | -12.25049400 | -6.47983100 | 0.76119600  |
| H | -6.45324800  | -4.56583100 | -0.16171700 |
| H | -5.33569000  | -5.93822900 | -0.11766000 |
| H | -6.49477300  | -5.78603100 | -1.43204700 |
| H | -7.77882400  | -8.60334200 | 0.80570400  |
| H | -6.08541300  | -8.21888000 | 0.51628300  |
| H | -7.22171500  | -8.22838400 | -0.82356300 |
| H | -10.50961400 | -4.61513900 | -2.29330800 |
| H | -11.12962200 | -6.01283500 | -3.17795900 |
| H | -11.79466100 | -5.60008700 | -1.60118600 |
| H | -9.60338100  | -8.69496800 | -1.06444800 |
| H | -10.56377200 | -8.34868400 | -2.49879800 |
| H | -11.24885500 | -8.08739000 | -0.90136800 |
| H | -11.55900300 | 5.78874900  | -0.25935800 |
| H | -7.80663600  | 5.78767900  | -2.07341700 |
| H | -8.11482500  | 5.85605800  | 2.08956200  |
| H | -10.71971900 | 4.85672400  | -2.41672100 |
| H | -11.98002700 | 6.06399000  | -2.67721000 |
| H | -10.29416500 | 6.47898100  | -2.96184800 |
| H | -11.29840100 | 8.17914300  | 0.33351900  |
| H | -12.25589400 | 8.01080600  | -1.13293100 |
| H | -10.57783500 | 8.52509700  | -1.23533500 |
| H | -6.34151800  | 4.90605400  | -0.26575200 |
| H | -5.50761800  | 6.12337400  | -1.23569600 |
| H | -6.11191500  | 6.53998200  | 0.36334400  |
| H | -8.50059200  | 8.16478700  | -2.17535100 |
| H | -6.74967900  | 8.02723500  | -2.27955500 |
| H | -7.50031200  | 8.55080100  | -0.77852200 |
| H | -10.40385300 | 4.95102800  | 2.47657500  |
| H | -9.99687000  | 6.20227400  | 3.65123800  |
| H | -11.08394400 | 6.57139100  | 2.31802600  |
| H | -7.71272900  | 8.22281600  | 1.48601600  |
| H | -8.50911700  | 8.11647000  | 3.05111300  |
| H | -9.42923700  | 8.58843900  | 1.62909100  |

## SUPPORTING INFORMATION

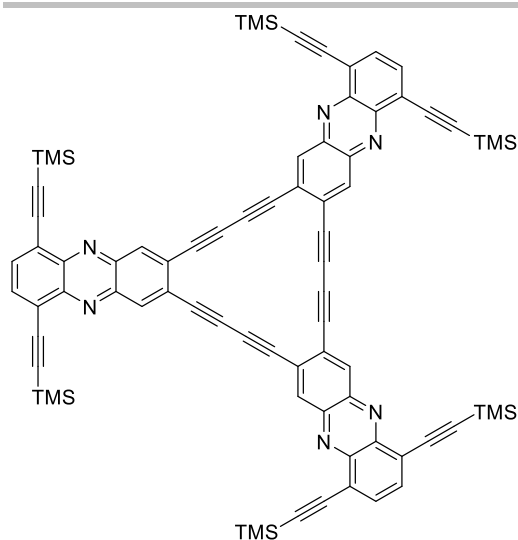3b<sub>3</sub>

|   |             |              |             |
|---|-------------|--------------|-------------|
| C | 11.37522400 | 0.70522000   | -0.02161500 |
| C | 11.20239700 | 2.10154500   | -0.02186400 |
| C | 9.95177000  | 2.68408900   | -0.01624500 |
| C | 8.79605700  | 1.82262700   | -0.01020600 |
| C | 8.97355100  | 0.38921100   | -0.01046900 |
| C | 10.30438200 | -0.16459200  | -0.01611500 |
| N | 7.57935900  | 2.36319800   | -0.00474200 |
| C | 6.53022600  | 1.53802500   | -0.00008400 |
| C | 6.70678600  | 0.11277500   | -0.00053300 |
| N | 7.92540100  | -0.43168000  | -0.00537300 |
| C | 5.21688500  | 2.07158200   | 0.00477300  |
| C | 4.11407800  | 1.24958900   | 0.00782000  |
| C | 4.29339900  | -0.19691500  | 0.00641500  |
| C | 5.56330100  | -0.72490000  | 0.00323900  |
| C | 3.16488900  | -1.04652900  | 0.00752800  |
| C | 2.19839400  | -1.78122300  | 0.00751600  |
| C | 2.81255300  | 1.79854100   | 0.01074500  |
| C | 1.69552200  | 2.27409800   | 0.01208700  |
| C | 0.45024900  | 2.80105100   | 0.01281700  |
| C | -0.66883100 | 3.27184400   | 0.01288600  |
| C | -2.80344500 | 0.33354200   | 0.00415600  |
| C | -2.95246800 | 1.53839000   | 0.00479400  |
| C | -3.13147600 | 2.93962700   | 0.00626700  |
| C | -1.97043900 | 3.82062700   | 0.01255400  |
| C | -2.15133700 | 5.18407300   | 0.01576500  |
| C | -3.44981300 | 5.75272800   | 0.01172600  |
| C | -4.59389800 | 4.88463700   | 0.00312600  |
| C | -4.39587200 | 3.48096500   | 0.00140800  |
| N | -3.59060600 | 7.08003300   | 0.01493200  |
| C | -4.82677100 | 7.57442000   | 0.00833600  |
| C | -5.97746200 | 6.70135900   | -0.00268000 |
| N | -5.83423300 | 5.37768700   | -0.00414500 |
| C | -5.01607800 | 9.00337800   | 0.01075100  |
| C | -6.30583700 | 9.49292900   | -0.00017200 |
| C | -7.42660800 | 8.64260300   | -0.01246300 |
| C | -7.30261600 | 7.26849200   | -0.01335900 |
| C | -5.07624100 | -10.19910700 | -0.00371200 |
| C | -3.78076800 | -10.74784600 | -0.00085600 |
| C | -2.65097000 | -9.95595500  | 0.00206200  |

## SUPPORTING INFORMATION

---

|    |              |              |             |
|----|--------------|--------------|-------------|
| C  | -2.81910600  | -8.52443200  | 0.00091600  |
| C  | -4.14915100  | -7.96099400  | -0.00256100 |
| C  | -5.29399300  | -8.83666100  | -0.00465700 |
| N  | -1.74241700  | -7.74122100  | 0.00353500  |
| C  | -1.93220900  | -6.42002800  | 0.00232300  |
| C  | -3.25464900  | -5.85976600  | -0.00105900 |
| N  | -4.33569700  | -6.64262400  | -0.00325300 |
| C  | -0.81334000  | -5.54969200  | 0.00464600  |
| C  | -0.97323900  | -4.18356900  | 0.00388200  |
| C  | -2.31518600  | -3.61509400  | 0.00146800  |
| C  | -3.40772200  | -4.45048500  | -0.00110600 |
| C  | -2.48584300  | -2.21288200  | 0.00278800  |
| C  | -2.63654800  | -1.00827900  | 0.00384500  |
| C  | 0.15357000   | -3.33167400  | 0.00591400  |
| C  | 1.12204600   | -2.59964700  | 0.00706600  |
| C  | 10.50285300  | -1.56838500  | -0.01573800 |
| C  | 10.70547800  | -2.76464500  | -0.01513700 |
| C  | 9.80206400   | 4.09387100   | -0.01570600 |
| C  | 9.70646900   | 5.30345400   | -0.01505200 |
| C  | -3.90217800  | 9.88026100   | 0.02290000  |
| C  | -2.96945900  | 10.65617800  | 0.03235700  |
| C  | -8.44702500  | 6.43173100   | -0.02749700 |
| C  | -9.44512400  | 5.74204200   | -0.04016200 |
| C  | -6.60936900  | -8.30788800  | -0.00458500 |
| C  | -7.74776300  | -7.88829700  | -0.00325900 |
| C  | -1.35519200  | -10.53114100 | 0.00594700  |
| C  | -0.25999500  | -11.05337000 | 0.01116600  |
| Si | 10.98194700  | -4.58474900  | -0.01667300 |
| C  | 12.40980000  | -4.96993600  | 1.14199000  |
| C  | 9.40741300   | -5.42085700  | 0.57190000  |
| C  | 11.39729900  | -5.11711000  | -1.76994200 |
| Si | 9.51704500   | 7.13471500   | -0.01632500 |
| C  | 7.74117800   | 7.54480800   | 0.43373600  |
| C  | 10.70462600  | 7.85470100   | 1.24913000  |
| C  | 9.92790400   | 7.77015200   | -1.73602300 |
| Si | -1.52908800  | 11.80273100  | 0.04973600  |
| C  | -0.80451200  | 11.80929300  | 1.78284300  |
| C  | -0.26458000  | 11.18198900  | -1.19206100 |
| C  | -2.12798800  | 13.52005600  | -0.42073700 |
| Si | -10.93662300 | 4.66304900   | -0.05076500 |
| C  | -11.27771600 | 4.10985500   | 1.71177500  |
| C  | -12.38446400 | 5.65549300   | -0.72019900 |
| C  | -10.58447800 | 3.18179100   | -1.14980100 |
| Si | -9.46082600  | -7.21375700  | 0.00049200  |
| C  | -9.85670900  | -6.62124600  | 1.73853700  |
| C  | -9.53917200  | -5.78760700  | -1.21825400 |
| C  | -10.63878600 | -8.58545300  | -0.51058300 |
| Si | 1.41831500   | -11.81000000 | 0.02782000  |
| C  | 2.07207500   | -11.75557300 | 1.78811600  |
| C  | 1.27673000   | -13.58649700 | -0.56662300 |
| C  | 2.52457900   | -10.81621500 | -1.11874600 |
| H  | 12.37790100  | 0.29949800   | -0.02566900 |
| H  | 12.07596800  | 2.73941400   | -0.02604700 |
| H  | 5.10411300   | 3.14681600   | 0.00557800  |
| H  | 5.71605000   | -1.79518300  | 0.00288800  |
| H  | -1.30239900  | 5.85346100   | 0.02049500  |
| H  | -5.26906800  | 2.84352100   | -0.00460300 |
| H  | -6.45818800  | 10.56380500  | 0.00034300  |
| H  | -8.41674500  | 9.07791800   | -0.02184100 |
| H  | -5.92909200  | -10.86440400 | -0.00512700 |

## SUPPORTING INFORMATION

---

|   |              |              |             |
|---|--------------|--------------|-------------|
| H | -3.66501100  | -11.82328700 | -0.00044300 |
| H | 0.17408200   | -5.98984700  | 0.00709100  |
| H | -4.41079100  | -4.04718600  | -0.00305100 |
| H | 12.60656900  | -6.04490700  | 1.16958800  |
| H | 13.32553900  | -4.46967000  | 0.81990600  |
| H | 12.19057400  | -4.64268500  | 2.16044200  |
| H | 9.52496800   | -6.50768900  | 0.58033500  |
| H | 8.56704700   | -5.17757200  | -0.08132000 |
| H | 9.14658800   | -5.10227800  | 1.58318200  |
| H | 10.58395600  | -4.87606900  | -2.45741100 |
| H | 12.29906800  | -4.61826900  | -2.13108800 |
| H | 11.56855600  | -6.19588700  | -1.81599500 |
| H | 7.58285300   | 8.62641300   | 0.44321400  |
| H | 7.04409100   | 7.10806200   | -0.28422800 |
| H | 7.48680900   | 7.15814700   | 1.42266400  |
| H | 10.62366000  | 8.94447700   | 1.27958200  |
| H | 11.73932200  | 7.60204600   | 1.00801400  |
| H | 10.49216900  | 7.47423500   | 2.25037800  |
| H | 9.25994400   | 7.33955200   | -2.48480100 |
| H | 9.82666500   | 8.85780200   | -1.78044500 |
| H | 10.95232000  | 7.51660600   | -2.01658600 |
| H | 0.06015100   | 12.47595100  | 1.83859400  |
| H | -1.53848700  | 12.14865000  | 2.51665400  |
| H | -0.47814800  | 10.80913500  | 2.07497400  |
| H | 0.61421200   | 11.83209700  | -1.20748100 |
| H | -0.68196700  | 11.15653200  | -2.20074100 |
| H | 0.06734500   | 10.17215200  | -0.94285300 |
| H | -2.57539300  | 13.52242200  | -1.41690700 |
| H | -2.87867700  | 13.88383400  | 0.28407100  |
| H | -1.29835700  | 14.23187900  | -0.42391500 |
| H | -12.15728100 | 3.46165700   | 1.74969000  |
| H | -10.43156100 | 3.55330700   | 2.11977500  |
| H | -11.46177500 | 4.96471500   | 2.36577000  |
| H | -13.29257100 | 5.04739400   | -0.74439800 |
| H | -12.18743300 | 6.00430100   | -1.73609600 |
| H | -12.58399900 | 6.53105000   | -0.09877200 |
| H | -9.72503800  | 2.61709900   | -0.78289700 |
| H | -11.44442300 | 2.50743700   | -1.17844900 |
| H | -10.36654300 | 3.49302800   | -2.17346700 |
| H | -10.86778000 | -6.20805100  | 1.78531500  |
| H | -9.79465400  | -7.44020200  | 2.45813200  |
| H | -9.15992400  | -5.84329800  | 2.05709200  |
| H | -10.54226000 | -5.35360700  | -1.24232600 |
| H | -9.29158600  | -6.11878500  | -2.22884100 |
| H | -8.83654900  | -4.99795800  | -0.94465300 |
| H | -10.58391100 | -9.42976200  | 0.17989400  |
| H | -11.67139900 | -8.22678700  | -0.52021400 |
| H | -10.40314000 | -8.95552000  | -1.51061800 |
| H | 3.07250200   | -12.19305500 | 1.84255500  |
| H | 2.13344900   | -10.72828900 | 2.15293300  |
| H | 1.42409300   | -12.31309800 | 2.46757500  |
| H | 2.25571500   | -14.07288900 | -0.57064400 |
| H | 0.87571700   | -13.63196600 | -1.58133300 |
| H | 0.61648900   | -14.16799300 | 0.08035200  |
| H | 2.14207300   | -10.82495300 | -2.14141100 |
| H | 2.58928700   | -9.77521400  | -0.79590200 |
| H | 3.53692800   | -11.22857800 | -1.13410500 |

## SUPPORTING INFORMATION

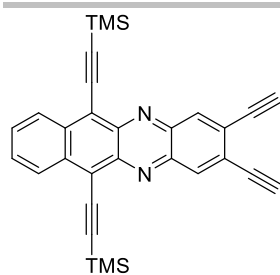

3c

|    |             |             |             |
|----|-------------|-------------|-------------|
| C  | 0.72116400  | -2.56804100 | -0.00347900 |
| C  | -0.72119700 | -2.56803000 | -0.00346900 |
| C  | -1.43626200 | -1.35304100 | -0.00237900 |
| C  | -0.72261300 | -0.12169600 | -0.00178800 |
| C  | 0.72261500  | -0.12170600 | -0.00179500 |
| C  | 1.43624700  | -1.35306100 | -0.00239500 |
| N  | -1.40909900 | 1.03054600  | -0.00134200 |
| C  | -0.72108000 | 2.16451700  | -0.00123700 |
| C  | 0.72111400  | 2.16450700  | -0.00124400 |
| N  | 1.40911700  | 1.03052700  | -0.00135600 |
| C  | -1.40943800 | 3.40917200  | -0.00119100 |
| C  | -0.72877500 | 4.59795700  | -0.00112200 |
| C  | 0.72884400  | 4.59794700  | -0.00113000 |
| C  | 1.40949000  | 3.40915200  | -0.00120700 |
| C  | 2.85160100  | -1.33673900 | -0.00173600 |
| C  | 4.06595000  | -1.34283800 | -0.00090800 |
| C  | -2.85161700 | -1.33669900 | -0.00170100 |
| C  | -4.06596500 | -1.34278500 | -0.00086400 |
| C  | 1.44074900  | 5.82913500  | -0.00116700 |
| C  | 2.05224800  | 6.86414500  | -0.00121800 |
| C  | -1.44066200 | 5.82915600  | -0.00115100 |
| C  | -2.05216000 | 6.86416700  | -0.00119100 |
| C  | 1.39869500  | -3.82321600 | -0.00464900 |
| C  | 0.70994500  | -4.99815100 | -0.00578500 |
| C  | -0.71001200 | -4.99814100 | -0.00577400 |
| C  | -1.39874600 | -3.82319600 | -0.00462800 |
| Si | 5.90532400  | -1.29232200 | 0.00315400  |
| C  | 6.53345300  | -2.33213100 | -1.43065300 |
| C  | 6.51566200  | -1.99492300 | 1.63571800  |
| C  | 6.44786400  | 0.49441600  | -0.18998800 |
| Si | -5.90534000 | -1.29227700 | 0.00315000  |
| C  | -6.53338800 | -2.33086600 | -1.43157600 |
| C  | -6.44788200 | 0.49462100  | -0.18849900 |
| C  | -6.51575800 | -1.99627300 | 1.63508300  |
| H  | -2.49034300 | 3.39070800  | -0.00143700 |
| H  | 2.49039500  | 3.39067300  | -0.00146600 |
| H  | 2.58796200  | 7.78155800  | -0.00138700 |
| H  | -2.58817200 | 7.78140600  | -0.00126600 |
| H  | 2.47956500  | -3.81800400 | -0.00470400 |
| H  | 1.24481400  | -5.93941600 | -0.00674500 |
| H  | -1.24489400 | -5.93939900 | -0.00672500 |
| H  | -2.47961600 | -3.81796900 | -0.00466600 |
| H  | 6.16512500  | -1.95071000 | -2.38514000 |
| H  | 7.62610500  | -2.32375700 | -1.46432100 |
| H  | 6.20938300  | -3.37090200 | -1.33864800 |
| H  | 6.13790600  | -1.41441900 | 2.47979400  |
| H  | 7.60793400  | -1.97952600 | 1.67859500  |
| H  | 6.18944000  | -3.02851300 | 1.76879000  |

## SUPPORTING INFORMATION

|   |             |             |             |
|---|-------------|-------------|-------------|
| H | 7.53829400  | 0.57127000  | -0.19080700 |
| H | 6.07902200  | 0.91780700  | -1.12632200 |
| H | 6.06670300  | 1.11015800  | 0.62706000  |
| H | -6.20929200 | -3.36970700 | -1.34045600 |
| H | -7.62603800 | -2.32249100 | -1.46528000 |
| H | -6.16503100 | -1.94861200 | -2.38571900 |
| H | -6.06679400 | 1.10967100  | 0.62910400  |
| H | -7.53831300 | 0.57146300  | -0.18933900 |
| H | -6.07897000 | 0.91881500  | -1.12444200 |
| H | -7.60803200 | -1.98092000 | 1.67791800  |
| H | -6.18953700 | -3.02997500 | 1.76729100  |
| H | -6.13804900 | -1.41648600 | 2.47967300  |

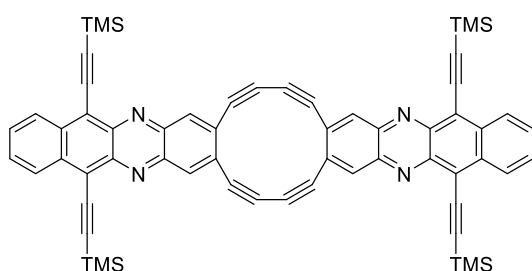3c<sub>2</sub>

|   |              |             |             |
|---|--------------|-------------|-------------|
| C | 10.28572400  | -0.72086300 | -0.00001300 |
| C | 10.28573000  | 0.72076500  | -0.00002300 |
| C | 9.06961300   | 1.43612100  | -0.00001500 |
| C | 7.83991600   | 0.72244000  | 0.00000000  |
| C | 7.83991000   | -0.72251400 | 0.00000900  |
| C | 9.06960000   | -1.43620800 | 0.00000500  |
| N | 6.68587400   | 1.40866700  | 0.00000400  |
| C | 5.55274100   | 0.72208900  | 0.00001400  |
| C | 5.55273500   | -0.72214500 | 0.00002200  |
| N | 6.68586200   | -1.40873200 | 0.00002100  |
| C | 4.30948400   | 1.41582900  | 0.00001500  |
| C | 3.12015300   | 0.73843700  | 0.00002100  |
| C | 3.12014700   | -0.73847400 | 0.00002700  |
| C | 4.30947400   | -1.41587500 | 0.00002900  |
| C | 1.86109100   | -1.38073600 | 0.00003700  |
| C | 0.67653800   | -1.65339000 | 0.00004000  |
| C | 1.86110200   | 1.38070900  | 0.00001500  |
| C | 0.67655200   | 1.65337400  | 0.00001100  |
| C | -0.67657400  | 1.65339200  | 0.00001700  |
| C | -1.86112900  | 1.38074700  | 0.00002400  |
| C | -0.67658700  | -1.65337200 | 0.00002500  |
| C | -1.86113400  | -1.38069500 | 0.00001100  |
| C | -3.12018800  | -0.73842700 | -0.00001300 |
| C | -3.12018500  | 0.73848300  | -0.00001200 |
| C | -4.30951200  | 1.41588300  | -0.00002900 |
| C | -5.55277300  | 0.72215000  | -0.00004600 |
| C | -5.55277500  | -0.72208400 | -0.00004400 |
| C | -4.30951800  | -1.41582200 | -0.00002800 |
| N | -6.68590100  | 1.40873400  | -0.00005900 |
| C | -7.83994700  | 0.72251400  | -0.00006600 |
| C | -7.83995000  | -0.72244100 | -0.00005800 |
| N | -6.68590600  | -1.40866500 | -0.00004800 |
| C | -9.06964000  | 1.43620300  | -0.00007100 |
| C | -10.28576100 | 0.72085500  | -0.00009000 |
| C | -10.28576400 | -0.72077200 | -0.00008200 |
| C | -9.06964500  | -1.43612500 | -0.00005400 |
| C | 11.53999300  | -1.39872200 | -0.00001700 |

## SUPPORTING INFORMATION

---

|    |              |             |             |
|----|--------------|-------------|-------------|
| C  | 12.71537100  | -0.70974900 | -0.00003400 |
| C  | 12.71537700  | 0.70963100  | -0.00004700 |
| C  | 11.54000500  | 1.39861300  | -0.00004100 |
| C  | -11.54003200 | 1.39871200  | -0.00012200 |
| C  | -12.71540900 | 0.70973700  | -0.00014600 |
| C  | -12.71541100 | -0.70964300 | -0.00014000 |
| C  | -11.54003800 | -1.39862300 | -0.00010700 |
| C  | -9.05443600  | -2.85140300 | -0.00003300 |
| C  | -9.06382300  | -4.06567500 | -0.00001600 |
| C  | -9.05442500  | 2.85148200  | -0.00006100 |
| C  | -9.06380200  | 4.06575300  | -0.00003700 |
| C  | 9.05438100   | -2.85148600 | 0.00002100  |
| C  | 9.05440700   | 2.85139900  | -0.00002300 |
| C  | 9.06382600   | 4.06567100  | -0.00003100 |
| C  | 9.06374100   | -4.06575800 | 0.00003700  |
| Si | -9.01434900  | 5.90555400  | 0.00012300  |
| C  | -8.10667200  | 6.47199700  | -1.54343600 |
| C  | -10.77929700 | 6.55054200  | -0.00049500 |
| C  | -8.10785100  | 6.47176400  | 1.54446000  |
| Si | -9.01438100  | -5.90547600 | 0.00003000  |
| C  | -10.77933200 | -6.55046200 | 0.00066000  |
| C  | -8.10783400  | -6.47186000 | -1.54421400 |
| C  | -8.10677000  | -6.47175000 | 1.54368800  |
| Si | 9.01417200   | -5.90555600 | 0.00004400  |
| C  | 10.77908100  | -6.55065300 | 0.00142500  |
| C  | 8.10586000   | -6.47178800 | 1.54330400  |
| C  | 8.10826300   | -6.47186800 | -1.54460200 |
| Si | 9.01465400   | 5.90547900  | -0.00004500 |
| C  | 8.10755200   | 6.47195300  | 1.54383900  |
| C  | 10.77970200  | 6.55020000  | 0.00007900  |
| C  | 8.10777600   | 6.47193600  | -1.54406700 |
| H  | 4.33262900   | 2.49681900  | 0.00001100  |
| H  | 4.33261100   | -2.49686600 | 0.00004000  |
| H  | -4.33265100  | 2.49687300  | -0.00002100 |
| H  | -4.33266000  | -2.49681200 | -0.00002400 |
| H  | 11.53487500  | -2.47962000 | -0.00000600 |
| H  | 13.65651300  | -1.24479500 | -0.00003600 |
| H  | 13.65652400  | 1.24466800  | -0.00006200 |
| H  | 11.53489600  | 2.47951100  | -0.00005000 |
| H  | -11.53491600 | 2.47961000  | -0.00012600 |
| H  | -13.65652000 | 1.24478000  | -0.00017200 |
| H  | -13.65655600 | -1.24468200 | -0.00016400 |
| H  | -11.53492800 | -2.47952100 | -0.00010300 |
| H  | -8.04637300  | 7.56296500  | -1.57851800 |
| H  | -7.08907000  | 6.07715600  | -1.56697300 |
| H  | -8.61654200  | 6.13393700  | -2.44782400 |
| H  | -10.79163800 | 7.64357600  | -0.00099400 |
| H  | -11.32476500 | 6.21089000  | 0.88251700  |
| H  | -11.32443600 | 6.21008800  | -0.88340000 |
| H  | -7.09022200  | 6.07703100  | 1.56866000  |
| H  | -8.04769400  | 7.56273200  | 1.57982200  |
| H  | -8.61835000  | 6.13345500  | 2.44840100  |
| H  | -10.79165800 | -7.64349800 | 0.00114400  |
| H  | -11.32446800 | -6.21002900 | 0.88357400  |
| H  | -11.32481300 | -6.21081000 | -0.88234300 |
| H  | -8.04786900  | -7.56283800 | -1.57956800 |
| H  | -7.09013200  | -6.07731000 | -1.56831200 |
| H  | -8.61818000  | -6.13345700 | -2.44820500 |
| H  | -8.61691000  | -6.13393300 | 2.44801500  |
| H  | -8.04610900  | -7.56270000 | 1.57869400  |



## SUPPORTING INFORMATION

|   |             |             |             |
|---|-------------|-------------|-------------|
| H | -7.08930600 | -6.07656700 | 1.56743200  |
| H | 10.79135100 | -7.64368900 | 0.00156600  |
| H | 11.32505800 | -6.21074400 | -0.88117200 |
| H | 11.32375700 | -6.21052700 | 0.88474200  |
| H | 8.04539300  | -7.56274600 | 1.57842800  |
| H | 7.08830700  | -6.07680100 | 1.56646700  |
| H | 8.61546600  | -6.13374900 | 2.44784900  |
| H | 8.61915500  | -6.13369000 | -2.44837000 |
| H | 8.04804900  | -7.56283500 | -1.57987200 |
| H | 7.09067100  | -6.07707000 | -1.56926200 |
| H | 8.04744800  | 7.56292900  | 1.57902900  |
| H | 7.08989000  | 6.07728400  | 1.56767500  |
| H | 8.61765900  | 6.13373400  | 2.44803500  |
| H | 10.79220600 | 7.64323300  | 0.00007500  |
| H | 11.32501900 | 6.21006100  | -0.88283700 |
| H | 11.32489100 | 6.21006900  | 0.88307800  |
| H | 7.09012300  | 6.07725500  | -1.56805400 |
| H | 8.04766500  | 7.56291100  | -1.57926900 |
| H | 8.61802200  | 6.13372100  | -2.44818600 |

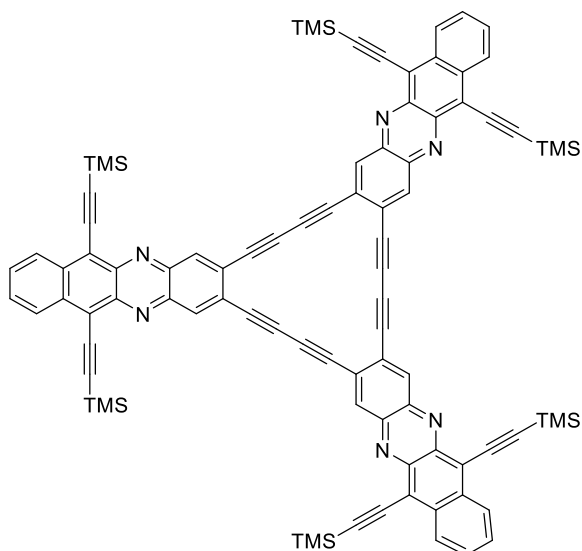**3c<sub>3</sub>**

|   |             |             |             |
|---|-------------|-------------|-------------|
| C | 11.16885700 | 2.41546000  | 0.00472000  |
| C | 10.77614800 | 3.80296500  | 0.00559700  |
| C | 9.41179800  | 4.16037100  | 0.00417700  |
| C | 8.42172100  | 3.13885900  | 0.00202400  |
| C | 8.81556000  | 1.74755600  | 0.00111500  |
| C | 10.19410200 | 1.39622100  | 0.00230500  |
| N | 7.12575800  | 3.48541200  | 0.00088500  |
| C | 6.22200200  | 2.51473900  | -0.00049300 |
| C | 6.61512700  | 1.12606900  | -0.00101800 |
| N | 7.89354300  | 0.77318300  | -0.00041000 |
| C | 4.83835800  | 2.83939000  | -0.00135100 |
| C | 3.87589000  | 1.86054400  | -0.00222600 |
| C | 4.27437300  | 0.45320100  | -0.00251800 |
| C | 5.60712400  | 0.12425900  | -0.00210400 |
| C | 3.28750400  | -0.55636700 | -0.00317500 |
| C | 2.44172400  | -1.42782600 | -0.00360100 |
| C | 2.50614300  | 2.20241600  | -0.00286300 |
| C | 1.32884700  | 2.50026800  | -0.00328500 |
| C | 0.01818900  | 2.83067400  | -0.00314700 |
| C | -1.15927100 | 3.12779800  | -0.00294900 |

## SUPPORTING INFORMATION

---

|    |              |              |             |
|----|--------------|--------------|-------------|
| C  | -2.82484700  | -0.09792900  | -0.00200100 |
| C  | -3.15603400  | 1.07043100   | -0.00131400 |
| C  | -3.54579200  | 2.42733100   | -0.00126800 |
| C  | -2.52719500  | 3.47692800   | -0.00210000 |
| C  | -2.90981600  | 4.79529800   | -0.00235000 |
| C  | -4.28180000  | 5.16616000   | -0.00167100 |
| C  | -5.28687800  | 4.13042200   | -0.00055800 |
| C  | -4.87504000  | 2.77023700   | -0.00046500 |
| N  | -4.61666700  | 6.44942500   | -0.00216900 |
| C  | -5.92186500  | 6.75941700   | -0.00150100 |
| C  | -6.92882100  | 5.72169600   | -0.00017000 |
| N  | -6.57966800  | 4.42646300   | 0.00023200  |
| C  | -6.30851400  | 8.12845500   | -0.00201100 |
| C  | -7.67901800  | 8.46145600   | -0.00094300 |
| C  | -8.68314200  | 7.42657900   | 0.00044900  |
| C  | -8.30895900  | 6.06682200   | 0.00068000  |
| C  | -3.49070600  | -10.87843800 | 0.00197400  |
| C  | -2.09263400  | -11.23181300 | 0.00035800  |
| C  | -1.10124600  | -10.22867800 | -0.00134300 |
| C  | -1.49132800  | -8.86058200  | -0.00145400 |
| C  | -2.89323700  | -8.50629500  | -0.00003300 |
| C  | -3.88643100  | -9.52472700  | 0.00171800  |
| N  | -0.54345500  | -7.91131800  | -0.00288000 |
| C  | -0.93239700  | -6.64338400  | -0.00274600 |
| C  | -2.33167700  | -6.28980700  | -0.00140300 |
| N  | -3.27631700  | -7.22067700  | -0.00013600 |
| C  | 0.04038900   | -5.60730800  | -0.00366200 |
| C  | -0.32637700  | -4.28444200  | -0.00328000 |
| C  | -1.74446700  | -3.92616400  | -0.00231400 |
| C  | -2.69554300  | -4.91600800  | -0.00137900 |
| C  | -2.12517500  | -2.56670700  | -0.00215400 |
| C  | -2.45636400  | -1.39838200  | -0.00210000 |
| C  | 0.65427300   | -3.26887600  | -0.00369800 |
| C  | 1.49999100   | -2.39742600  | -0.00376700 |
| C  | -4.45523100  | -11.92869300 | 0.00367900  |
| C  | -4.07527900  | -13.23683300 | 0.00378700  |
| C  | -2.69889900  | -13.58476700 | 0.00219800  |
| C  | -1.74297500  | -12.61429100 | 0.00055300  |
| C  | 12.56061400  | 2.10489800   | 0.00629000  |
| C  | 13.50374100  | 3.08780300   | 0.00868800  |
| C  | 13.11714200  | 4.45381700   | 0.00969700  |
| C  | 11.79878700  | 4.79675200   | 0.00820100  |
| C  | -8.10753500  | 9.82153600   | -0.00122400 |
| C  | -9.43073100  | 10.14531900  | -0.00020000 |
| C  | -10.41929800 | 9.12642700   | 0.00120400  |
| C  | -10.05557800 | 7.81367100   | 0.00154300  |
| C  | 10.56431900  | 0.03023900   | 0.00178300  |
| C  | 10.90142000  | -1.13633700  | 0.00134600  |
| C  | 9.01186300   | 5.51794700   | 0.00517600  |
| C  | 8.68975200   | 6.68877800   | 0.00592400  |
| C  | -5.31229000  | 9.13365200   | -0.00332800 |
| C  | -4.47334300  | 10.01157300  | -0.00480100 |
| C  | -9.28342000  | 5.04050200   | 0.00237700  |
| C  | -10.13492200 | 4.17476500   | 0.00375400  |
| C  | -5.25476300  | -9.16321200  | 0.00332300  |
| C  | -6.43410500  | -8.87380700  | 0.00480900  |
| C  | 0.27456500   | -10.56060300 | -0.00304300 |
| C  | 1.44985600   | -10.86602200 | -0.00465200 |
| Si | 11.34731500  | -2.92178000  | -0.00077500 |
| C  | 13.22058300  | -3.07037700  | 0.00197900  |

## SUPPORTING INFORMATION

---

|    |              |              |             |
|----|--------------|--------------|-------------|
| C  | 10.62262600  | -3.71301800  | 1.54069500  |
| C  | 10.62752800  | -3.70801100  | -1.54710600 |
| Si | 8.13879000   | 8.44469600   | 0.00430500  |
| C  | 7.09558200   | 8.73815100   | 1.53822000  |
| C  | 9.65978100   | 9.54819100   | 0.02226900  |
| C  | 7.12738700   | 8.74472600   | -1.54958100 |
| Si | -3.15469900  | 11.29530300  | -0.00694900 |
| C  | -2.10561900  | 11.06185700  | -1.54711400 |
| C  | -3.96972400  | 12.98860800  | -0.01654700 |
| C  | -2.11362700  | 11.07536900  | 1.54066300  |
| Si | -11.37683100 | 2.81664500   | 0.00355700  |
| C  | -13.09509600 | 3.57744800   | 0.00020900  |
| C  | -11.11526400 | 1.77725700   | -1.53874600 |
| C  | -11.11934600 | 1.78121500   | 1.54921900  |
| Si | -8.20461600  | -8.37183700  | 0.00762600  |
| C  | -8.53469500  | -7.36186800  | -1.54103000 |
| C  | -9.26532300  | -9.92307700  | 0.01989400  |
| C  | -8.52483600  | -7.34429700  | 1.54675400  |
| Si | 3.24636100   | -11.26493000 | -0.00757700 |
| C  | 4.02050900   | -10.51354500 | 1.52975100  |
| C  | 3.44344800   | -13.13374400 | 0.00296000  |
| C  | 4.01159200   | -10.53195800 | -1.55821600 |
| H  | 4.56286800   | 3.88480500   | -0.00115700 |
| H  | 5.92058700   | -0.91040300  | -0.00249400 |
| H  | -2.17118400  | 5.58473900   | -0.00319300 |
| H  | -5.64199500  | 2.00828900   | 0.00015600  |
| H  | 1.08354000   | -5.89124100  | -0.00447600 |
| H  | -3.74836200  | -4.67036000  | -0.00050500 |
| H  | -5.50192000  | -11.65889200 | 0.00484900  |
| H  | -4.82458900  | -14.01821600 | 0.00509100  |
| H  | -2.41091900  | -14.62836600 | 0.00228000  |
| H  | -0.69380100  | -12.87425700 | -0.00065500 |
| H  | 12.85006900  | 1.06344500   | 0.00550700  |
| H  | 14.55504200  | 2.82936000   | 0.00983600  |
| H  | 13.87709800  | 5.22484600   | 0.01176100  |
| H  | 11.49956900  | 5.83542600   | 0.00903300  |
| H  | -7.35123400  | 10.59380400  | -0.00232600 |
| H  | -9.73374600  | 11.18464900  | -0.00048100 |
| H  | -11.46732100 | 9.39785800   | 0.00198600  |
| H  | -10.80455800 | 7.03429600   | 0.00257500  |
| H  | 13.52538800  | -4.12012000  | 0.00144700  |
| H  | 13.65612500  | -2.59575900  | -0.87987200 |
| H  | 13.65351700  | -2.59747900  | 0.88603400  |
| H  | 10.85629900  | -4.78043700  | 1.57415500  |
| H  | 9.53648100   | -3.60465500  | 1.56318000  |
| H  | 11.02249000  | -3.25247600  | 2.44632900  |
| H  | 11.03022600  | -3.24426200  | -2.44984700 |
| H  | 10.86136700  | -4.77529100  | -1.58357500 |
| H  | 9.54143900   | -3.59960900  | -1.57264500 |
| H  | 6.73894900   | 9.77100700   | 1.57182600  |
| H  | 6.22458900   | 8.08001300   | 1.55187300  |
| H  | 7.66951100   | 8.55061300   | 2.44795300  |
| H  | 9.37240200   | 10.60285400  | 0.02254700  |
| H  | 10.28590200  | 9.37301200   | -0.85517800 |
| H  | 10.26869600  | 9.36784100   | 0.91069100  |
| H  | 6.25698100   | 8.08654500   | -1.58385900 |
| H  | 6.77134200   | 9.77766900   | -1.58638900 |
| H  | 7.72005600   | 8.56090500   | -2.44798100 |
| H  | -1.30127500  | 11.80132500  | -1.58321900 |
| H  | -1.65201100  | 10.06895700  | -1.56584500 |

## SUPPORTING INFORMATION

---

|   |              |              |             |
|---|--------------|--------------|-------------|
| H | -2.70478800  | 11.17182800  | -2.45324300 |
| H | -3.21631100  | 13.78062800  | -0.01889500 |
| H | -4.59936600  | 13.12941400  | 0.86455800  |
| H | -4.59600700  | 13.12092200  | -0.90135800 |
| H | -1.66015700  | 10.08266100  | 1.57030400  |
| H | -1.30942900  | 11.81508800  | 1.57456100  |
| H | -2.71745500  | 11.19318000  | 2.44270700  |
| H | -13.86277100 | 2.79927700   | -0.00013600 |
| H | -13.25287700 | 4.20165400   | 0.88230700  |
| H | -13.25021300 | 4.19982900   | -0.88365200 |
| H | -11.82953000 | 0.95036800   | -1.57379100 |
| H | -10.10886600 | 1.35466900   | -1.56071700 |
| H | -11.24631900 | 2.37363000   | -2.44391300 |
| H | -10.11265000 | 1.35951900   | 1.57530100  |
| H | -11.25354600 | 2.37987500   | 2.45242600  |
| H | -11.83303800 | 0.95386600   | 1.58432000  |
| H | -9.57695500  | -7.03371700  | -1.57423800 |
| H | -7.90040000  | -6.47380700  | -1.57263700 |
| H | -8.33673400  | -7.94524800  | -2.44249700 |
| H | -10.32761700 | -9.66530400  | 0.02185200  |
| H | -9.06747700  | -10.53041000 | 0.90568500  |
| H | -9.07320100  | -10.54049900 | -0.86016100 |
| H | -8.32109600  | -7.91737500  | 2.45352800  |
| H | -7.89035100  | -6.45598100  | 1.56417900  |
| H | -9.56686700  | -7.01572600  | 1.58289800  |
| H | 5.09361600   | -10.71954600 | 1.56285200  |
| H | 3.88421100   | -9.43045400  | 1.54788100  |
| H | 3.57143600   | -10.92135400 | 2.43759900  |
| H | 4.50074000   | -13.41126600 | 0.00096800  |
| H | 2.97804900   | -13.58535500 | -0.87571600 |
| H | 2.98412500   | -13.57480700 | 0.89015100  |
| H | 3.55757500   | -10.95097100 | -2.45847000 |
| H | 3.87477800   | -9.44921900  | -1.58879100 |
| H | 5.08458300   | -10.73798000 | -1.59488100 |

**2.2 NMR Spectroscopy**

## SUPPORTING INFORMATION

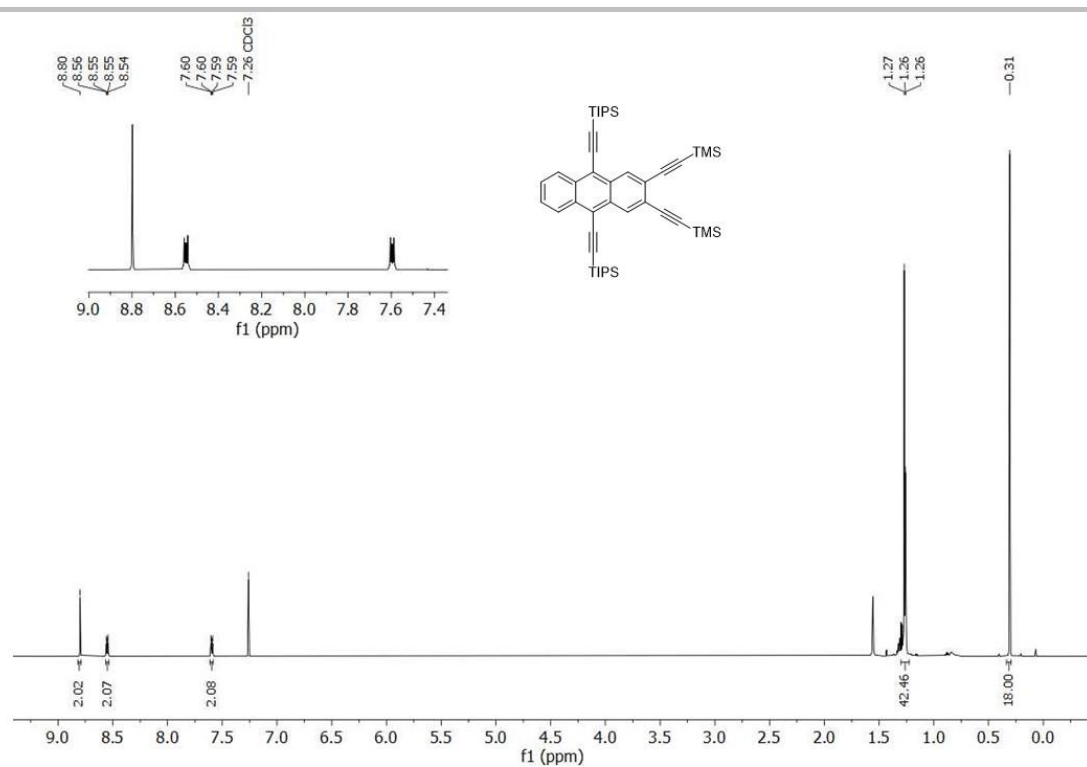

**Figure S8.**  $^1\text{H}$  NMR spectrum (600 MHz,  $\text{CDCl}_3$ , 295 K) of **2a**.

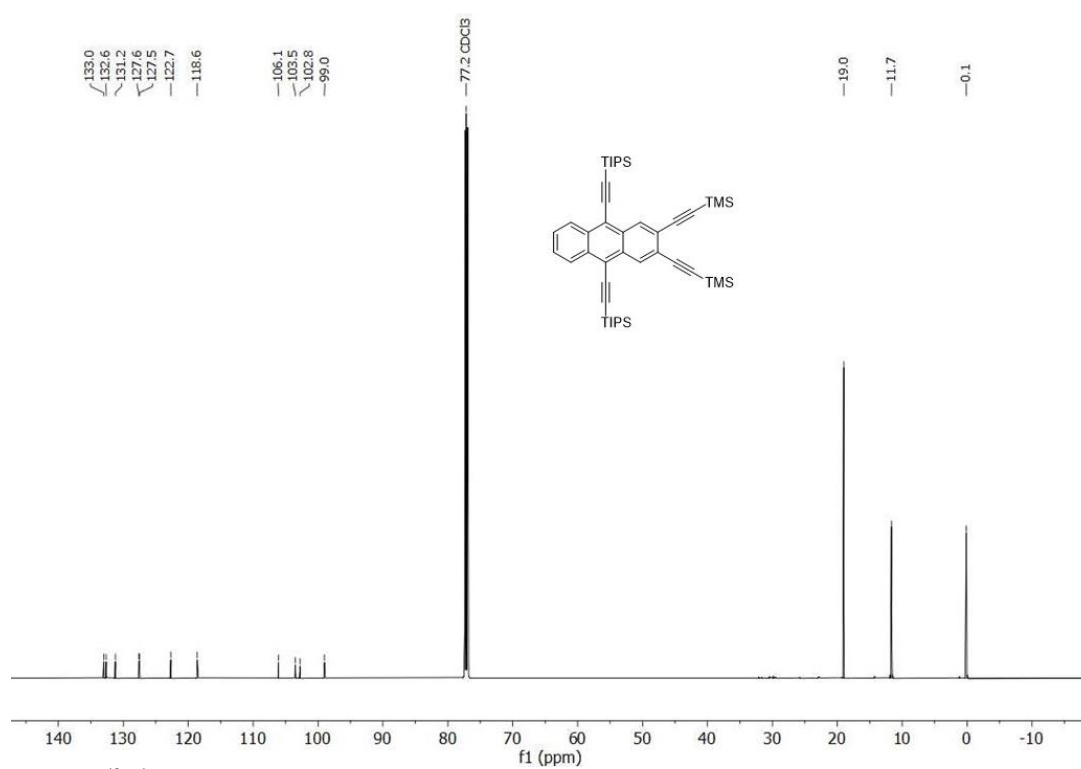

**Figure S9.**  $^{13}\text{C}$  NMR spectrum (151 MHz,  $\text{CDCl}_3$ , 295 K) of **2a**.

## SUPPORTING INFORMATION

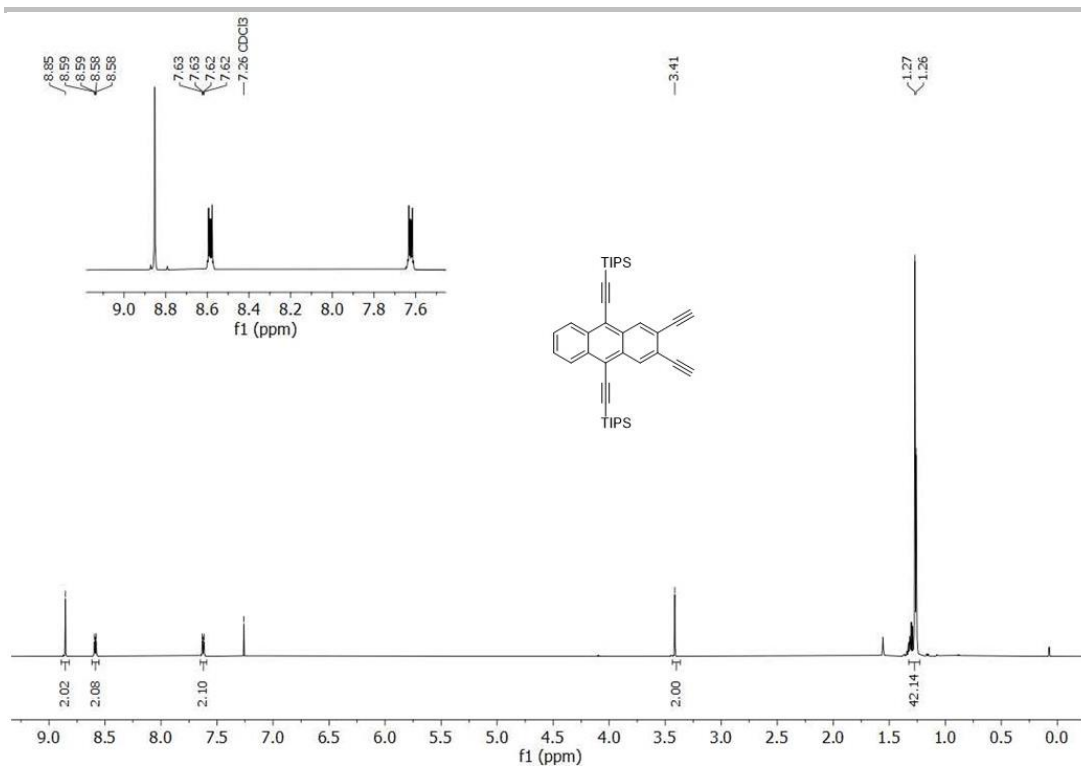

Figure S10. <sup>1</sup>H NMR spectrum (600 MHz, CDCl<sub>3</sub>, 295 K) of **3a**.

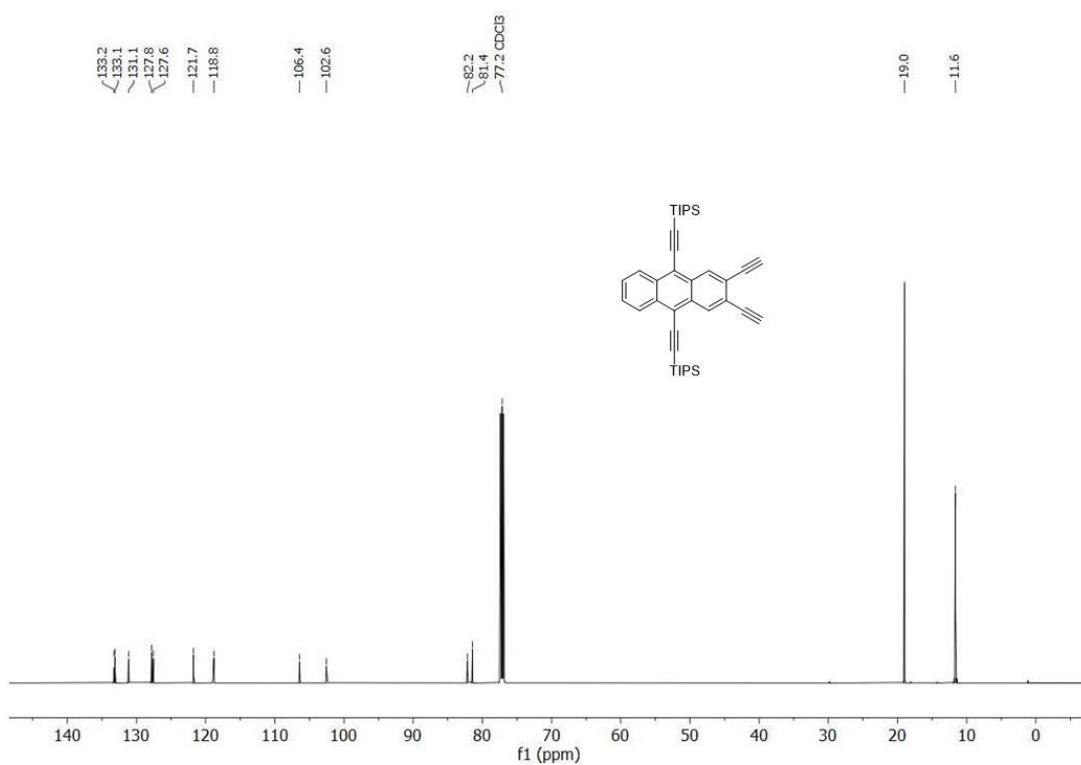

Figure S11. <sup>13</sup>C NMR spectrum (151 MHz, CDCl<sub>3</sub>, 295 K) of **3a**.

## SUPPORTING INFORMATION

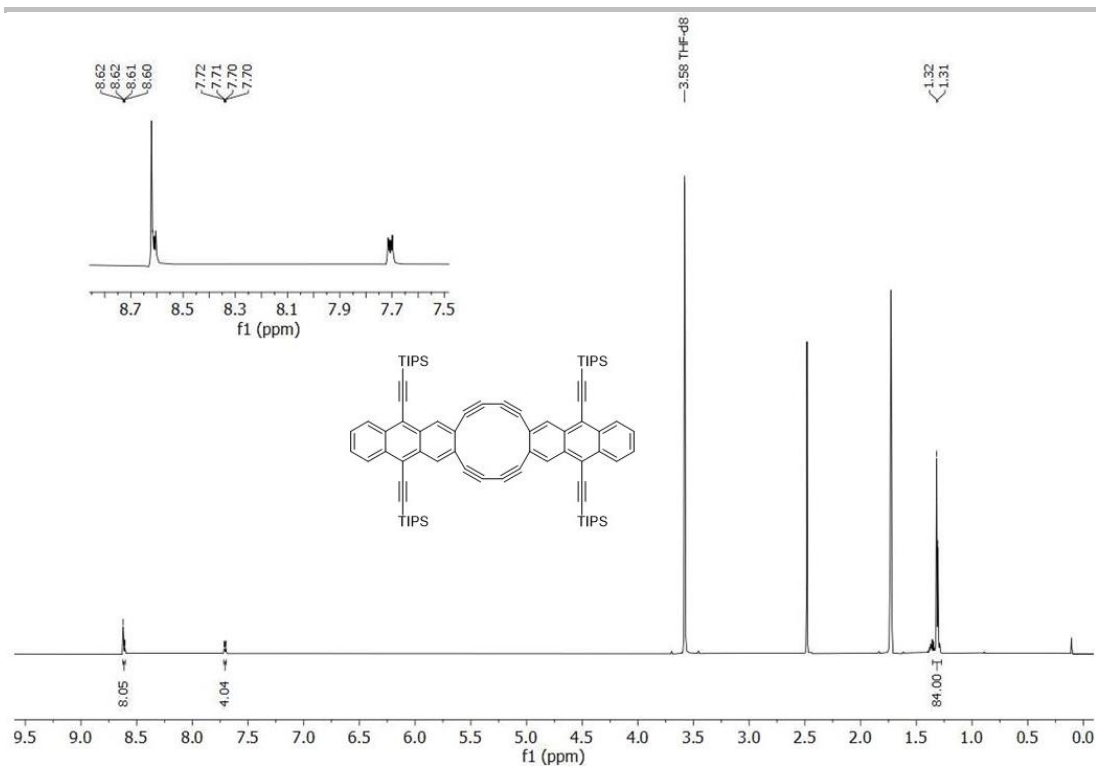

**Figure S12.**  $^1\text{H}$  NMR spectrum (600 MHz, THF- $d_8$ , 295 K) of **3a2**.

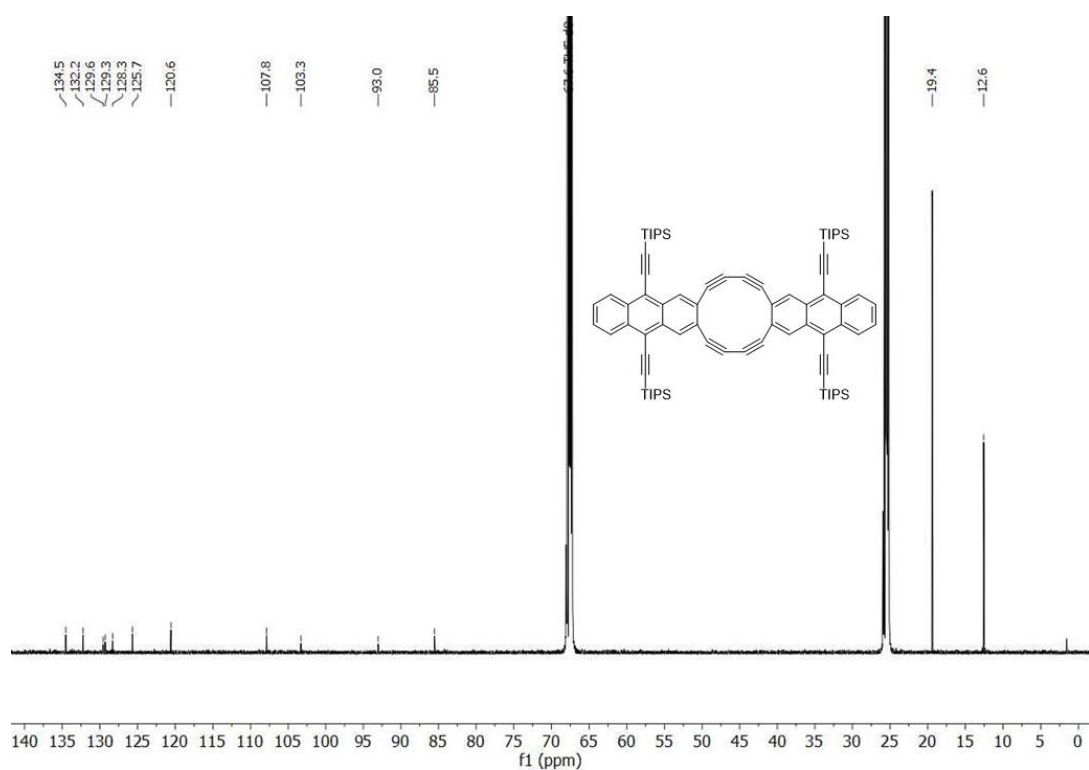

**Figure S13.**  $^{13}\text{C}\{^1\text{H}\}$  NMR spectrum (151 MHz, THF- $d_8$ , 295 K) of **3a2**.

## SUPPORTING INFORMATION

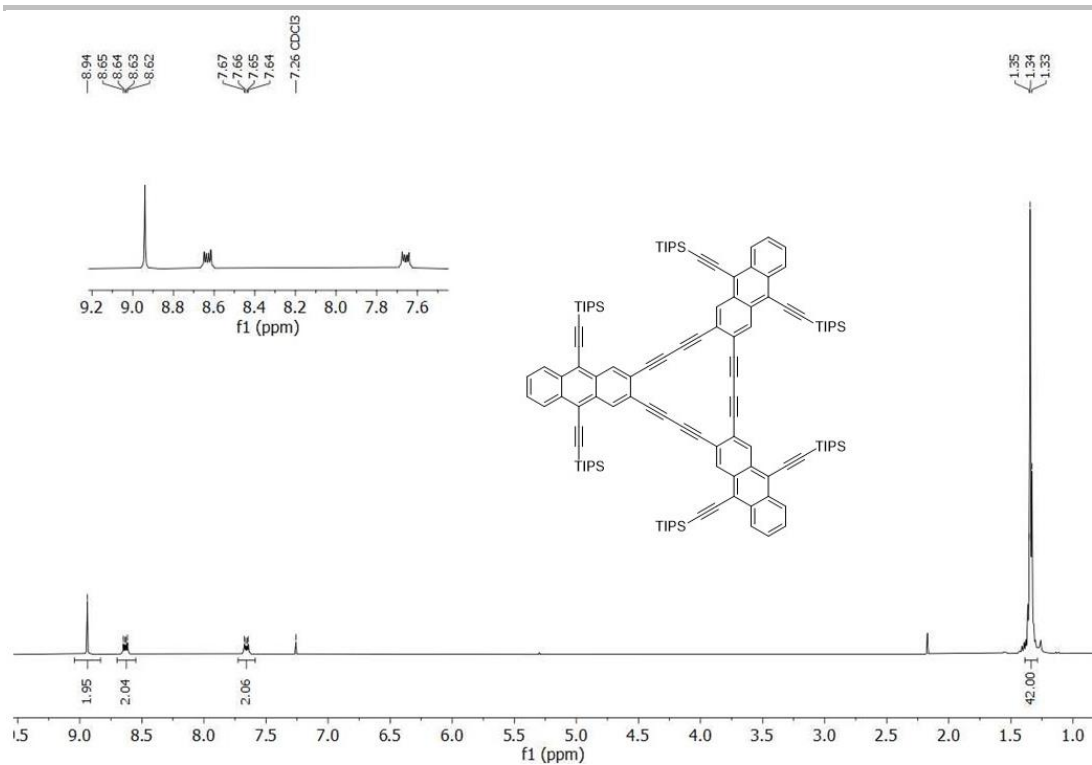

Figure S14.  $^1\text{H}$  NMR spectrum (300 MHz,  $\text{CDCl}_3$ , 295 K) of **3a<sub>3</sub>**.

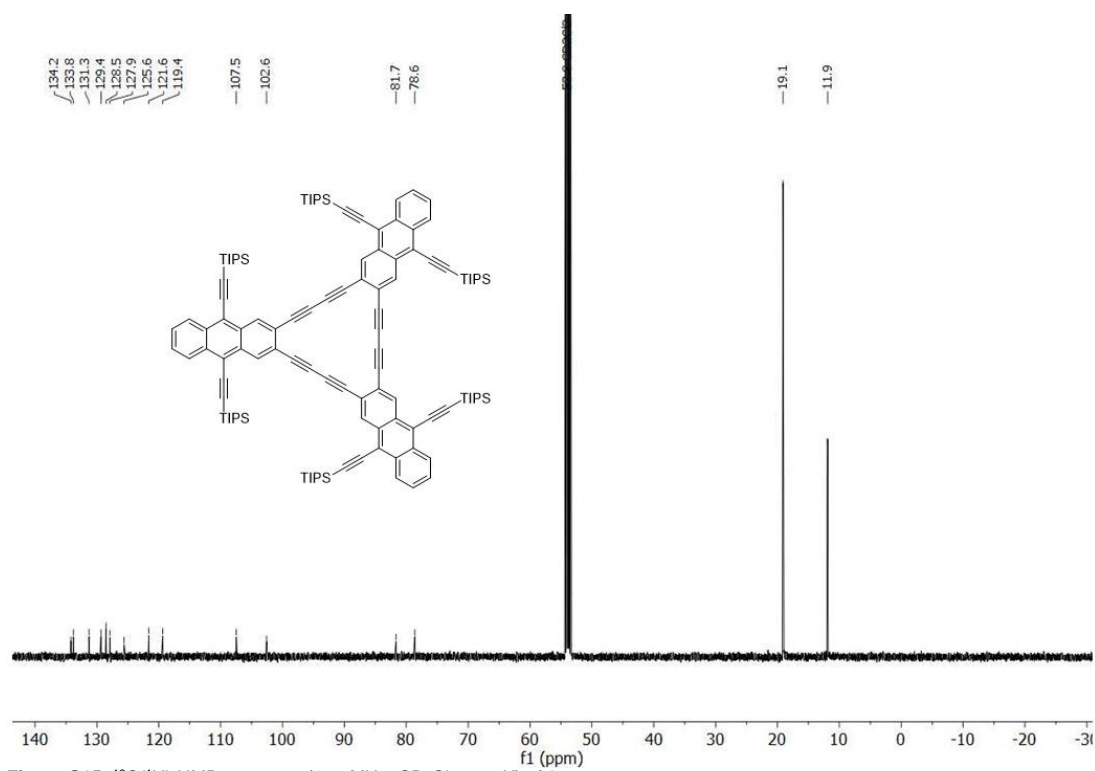

Figure S15.  $^{13}\text{C}\{^1\text{H}\}$  NMR spectrum (126 MHz,  $\text{CD}_2\text{Cl}_2$ , 295 K) of **3a<sub>3</sub>**.



## SUPPORTING INFORMATION

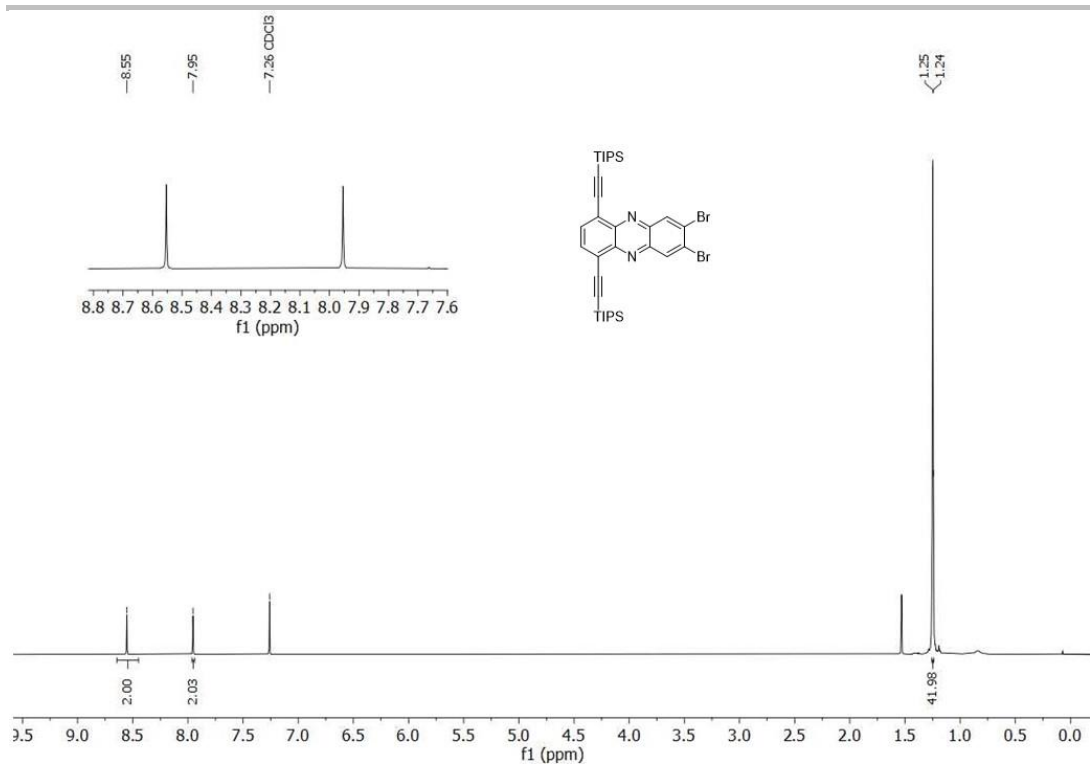**Figure S16.** <sup>1</sup>H NMR spectrum (400 MHz, CDCl<sub>3</sub>, 295 K) of **1b**.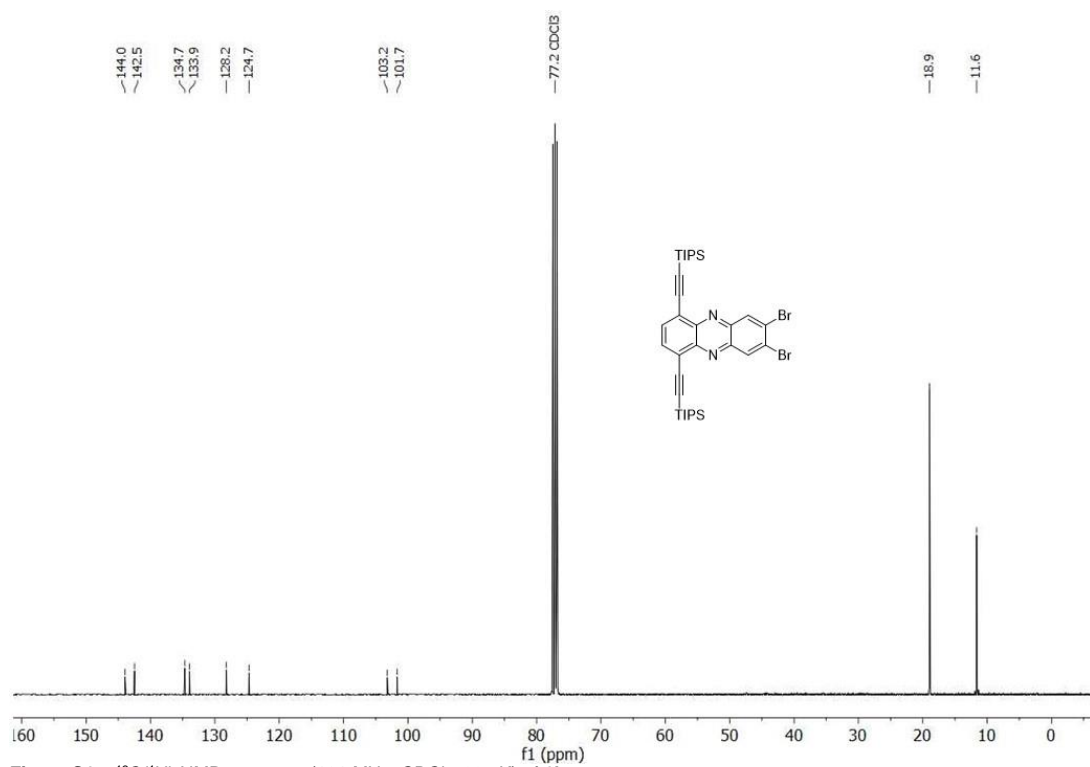**Figure S17.** <sup>13</sup>C{<sup>1</sup>H} NMR spectrum (101 MHz, CDCl<sub>3</sub>, 295 K) of **1b**.

## SUPPORTING INFORMATION

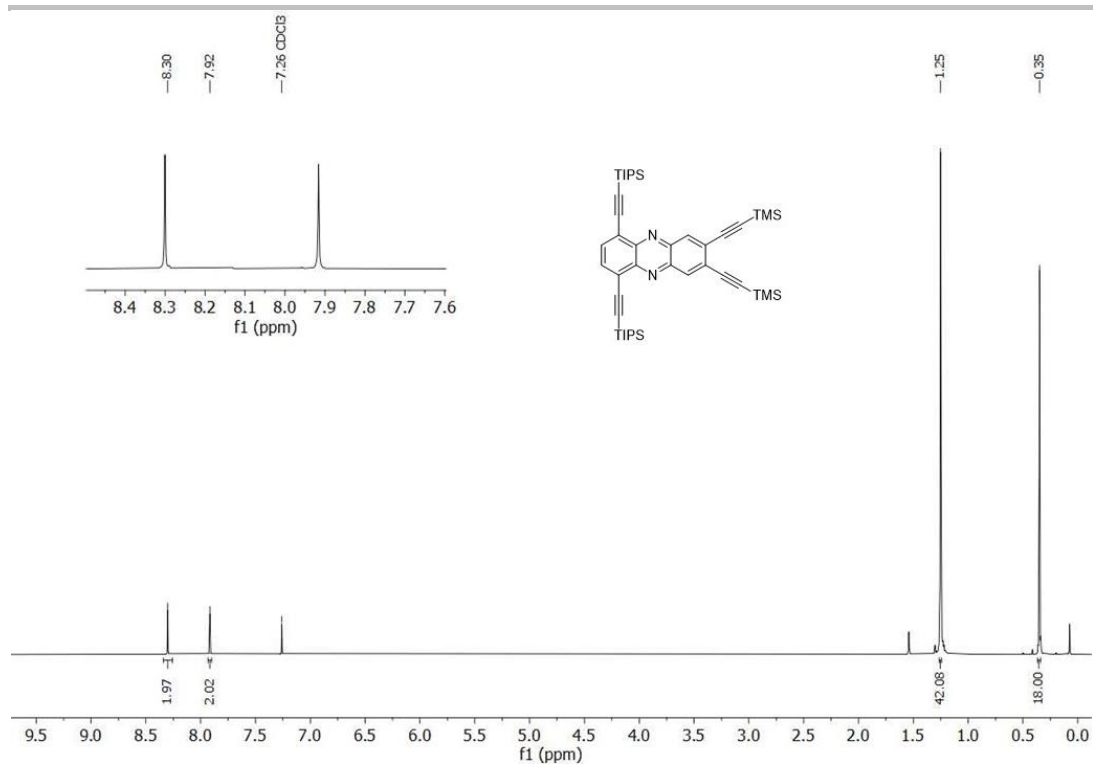

**Figure S18.**  $^1\text{H}$  NMR spectrum (400 MHz,  $\text{CDCl}_3$ , 295 K) of **2b**.

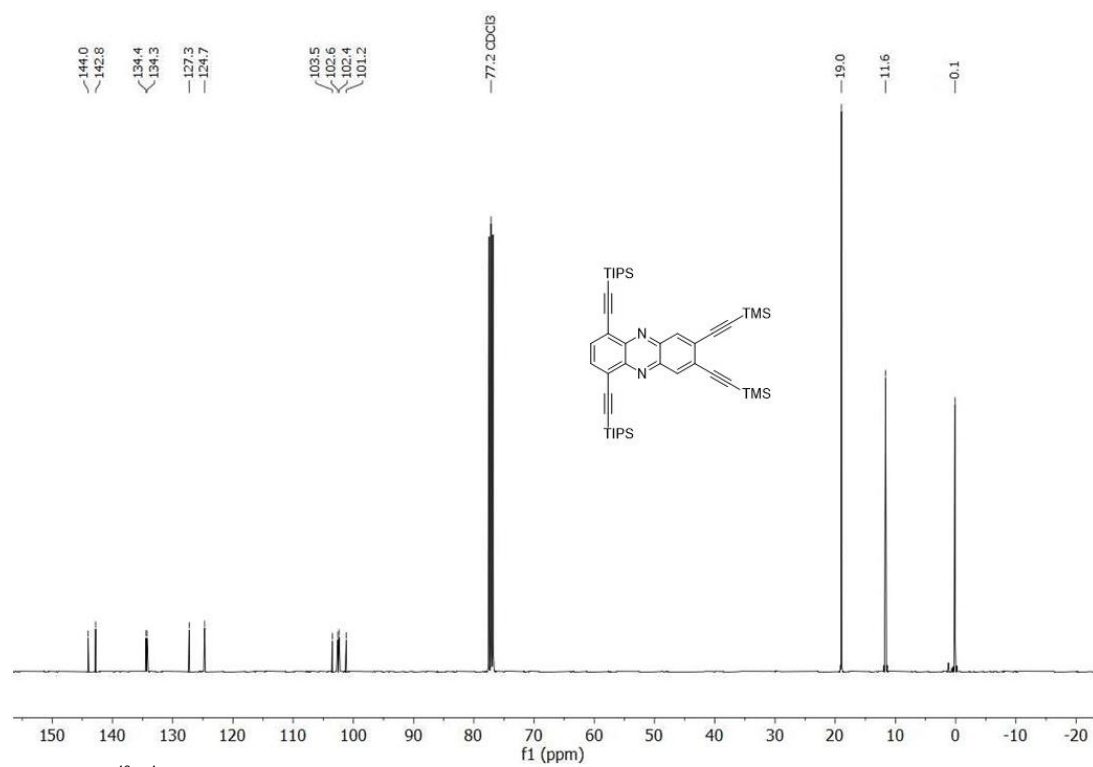

**Figure S19.**  $^{13}\text{C}\{^1\text{H}\}$  NMR spectrum (101 MHz,  $\text{CDCl}_3$ , 295 K) of **2b**.

## SUPPORTING INFORMATION

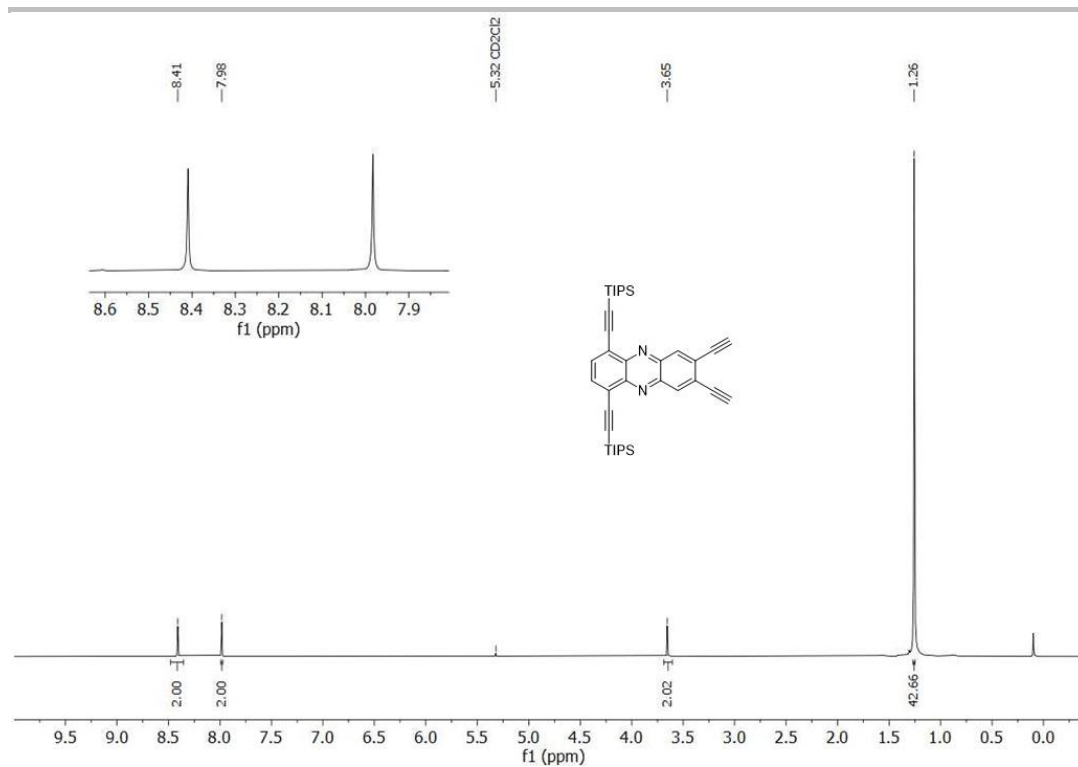

Figure S20.  $^1\text{H}$  NMR spectrum (400 MHz,  $\text{CD}_2\text{Cl}_2$ , 295 K) of **3b**.

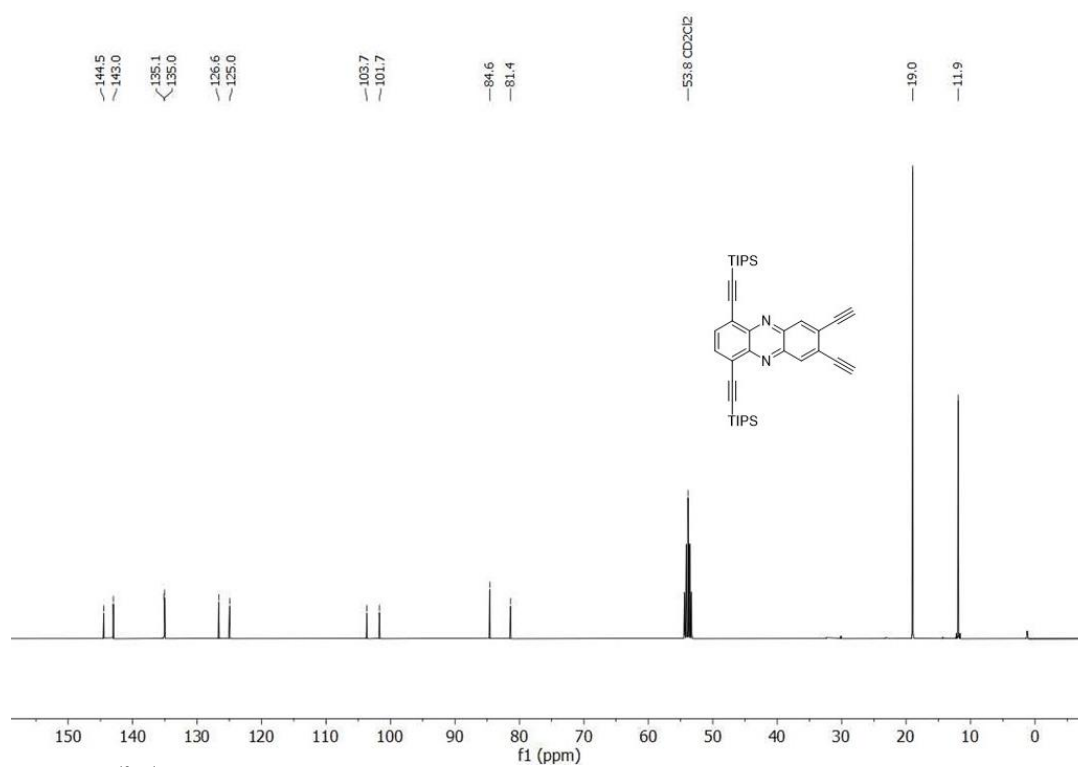

Figure S21.  $^{13}\text{C}\{^1\text{H}\}$  NMR spectrum (101 MHz,  $\text{CD}_2\text{Cl}_2$ , 295 K) of **3b**.

## SUPPORTING INFORMATION

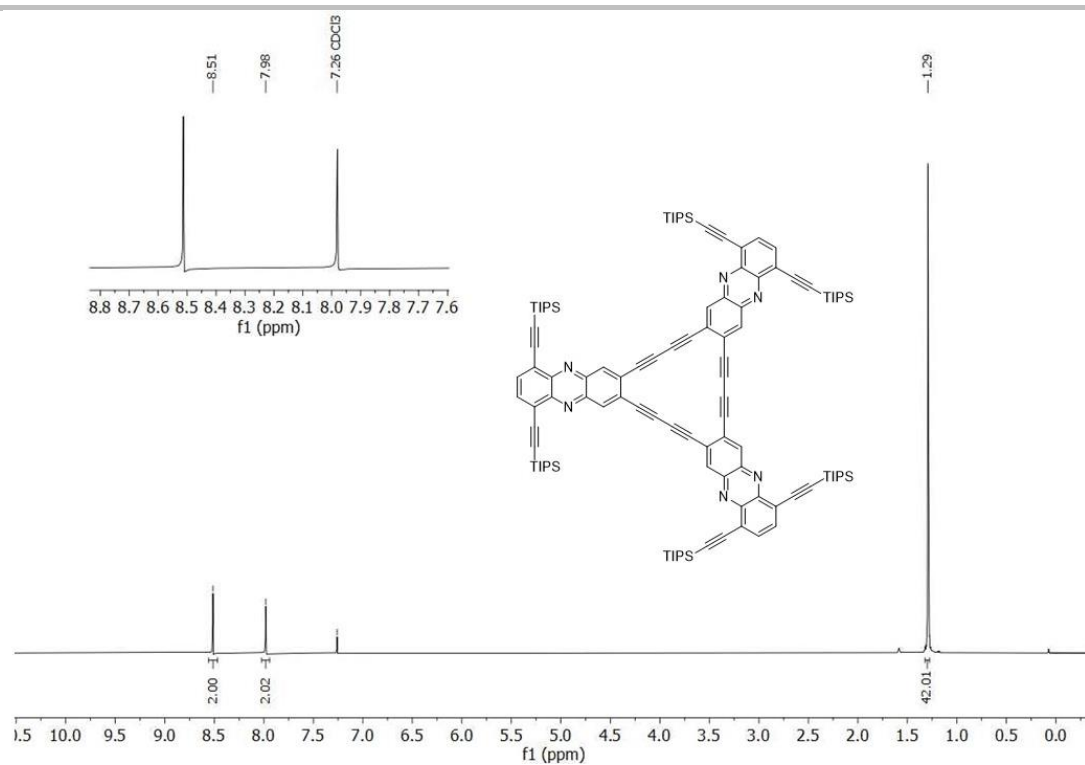

Figure S22.  $^1\text{H}$  NMR spectrum (600 MHz,  $\text{CDCl}_3$ , 295 K) of **3b<sub>3</sub>**.

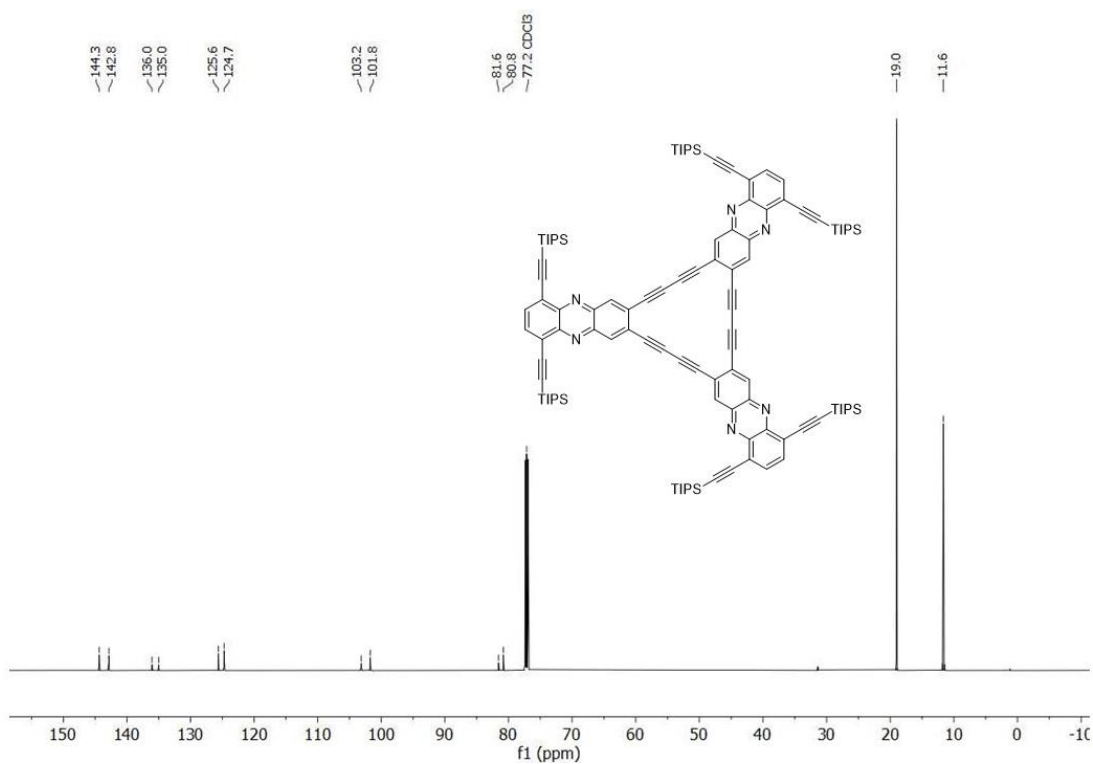

Figure S23.  $^{13}\text{C}\{^1\text{H}\}$  NMR spectrum (151 MHz,  $\text{CDCl}_3$ , 295 K) of **3b<sub>3</sub>**.

## SUPPORTING INFORMATION

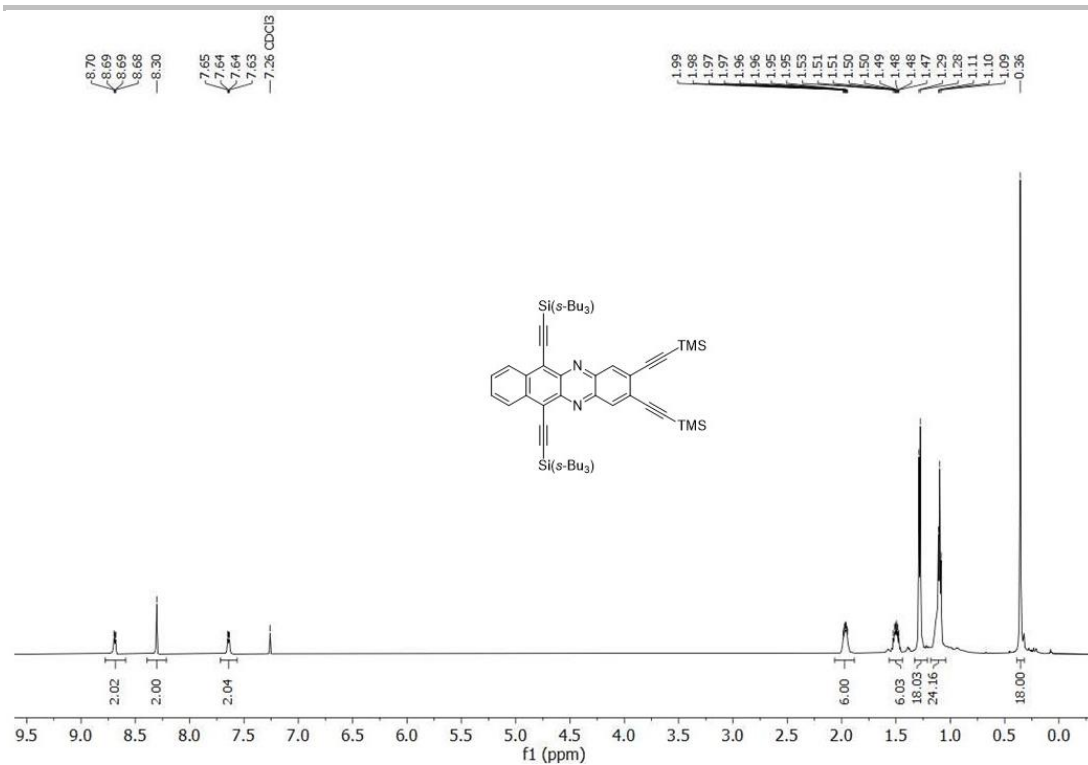

**Figure S24.**  $^1\text{H}$  NMR spectrum (600 MHz,  $\text{CDCl}_3$ , 295 K) of **2c**.

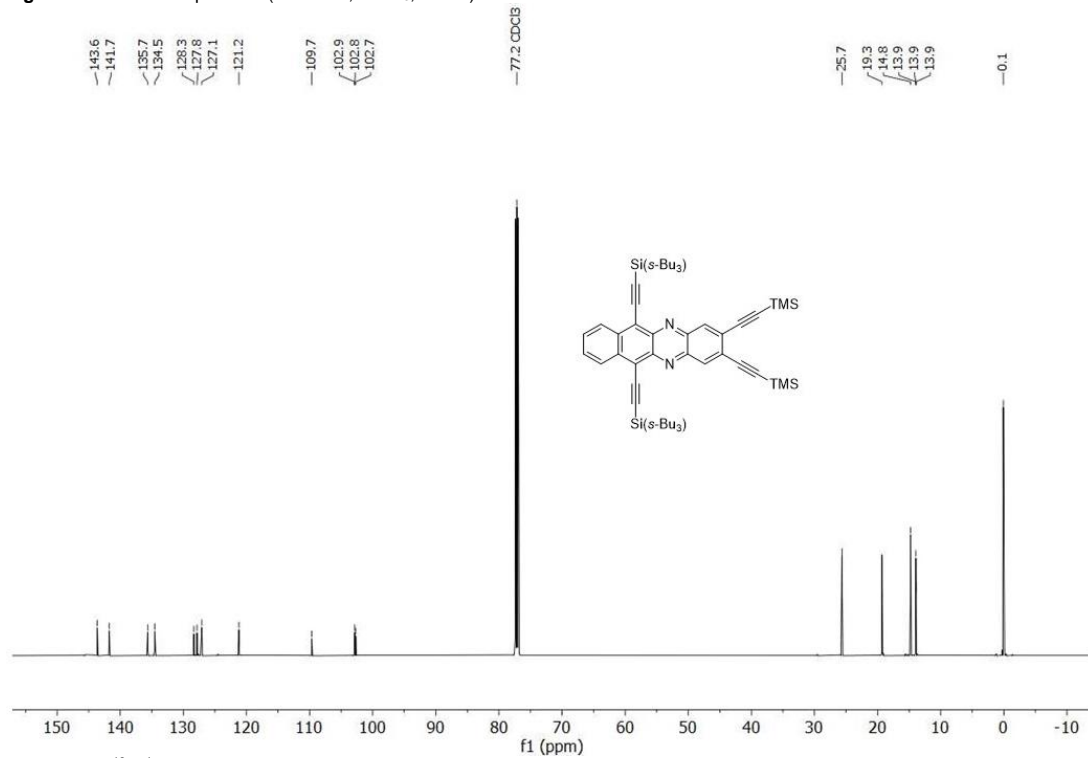

**Figure S25.**  $^{13}\text{C}\{^1\text{H}\}$  NMR spectrum (151 MHz,  $\text{CDCl}_3$ , 295 K) of **2c**.

## SUPPORTING INFORMATION

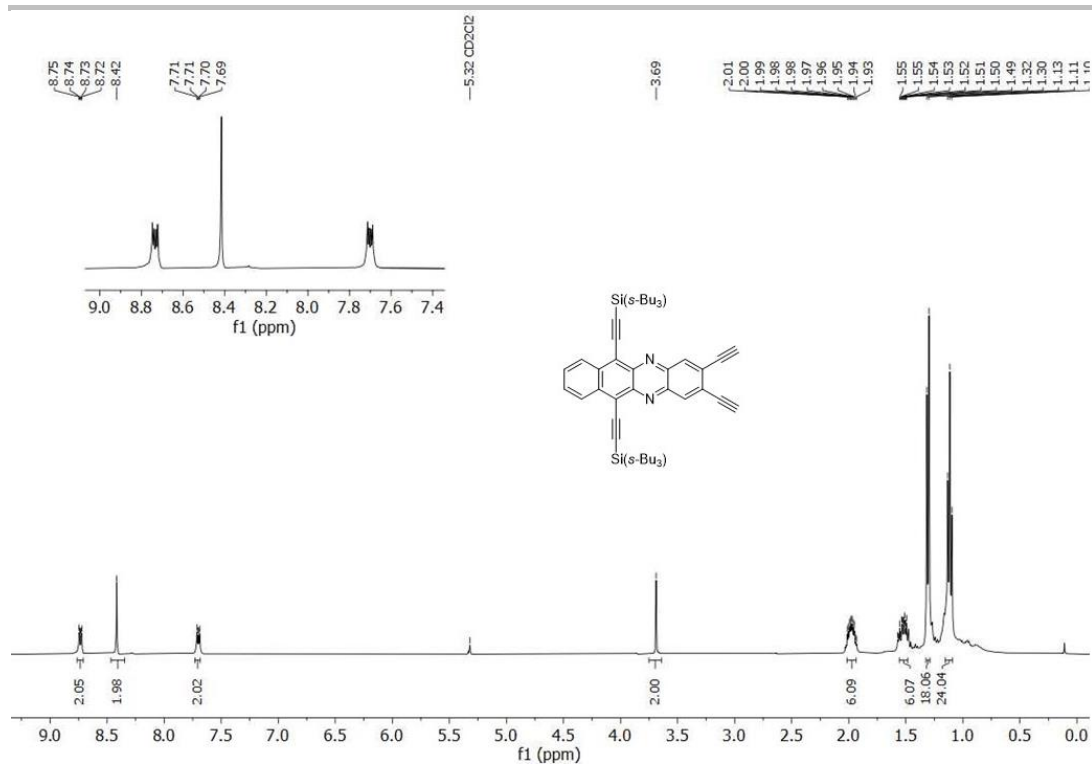

Figure S26.  $^1\text{H}$  NMR spectrum (600 MHz,  $\text{CD}_2\text{Cl}_2$ , 295 K) of **3c**.

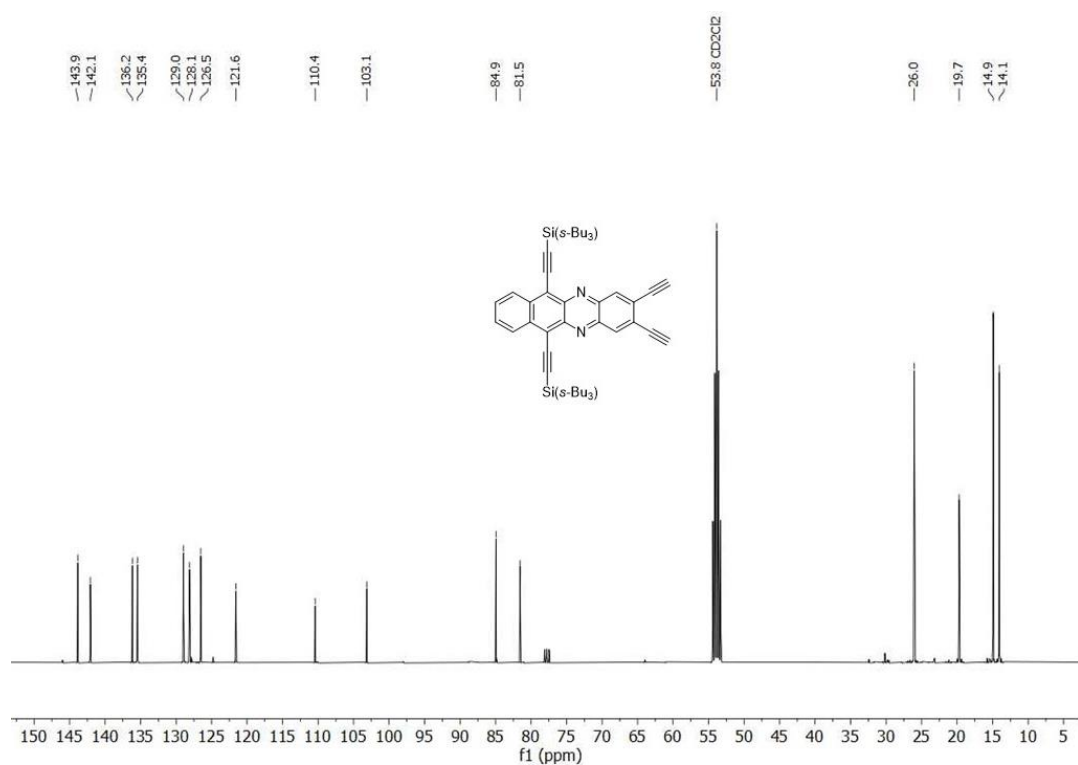

Figure S27.  $^{13}\text{C}$  NMR spectrum (151 MHz,  $\text{CD}_2\text{Cl}_2$ , 295 K) of **3c**.

## SUPPORTING INFORMATION

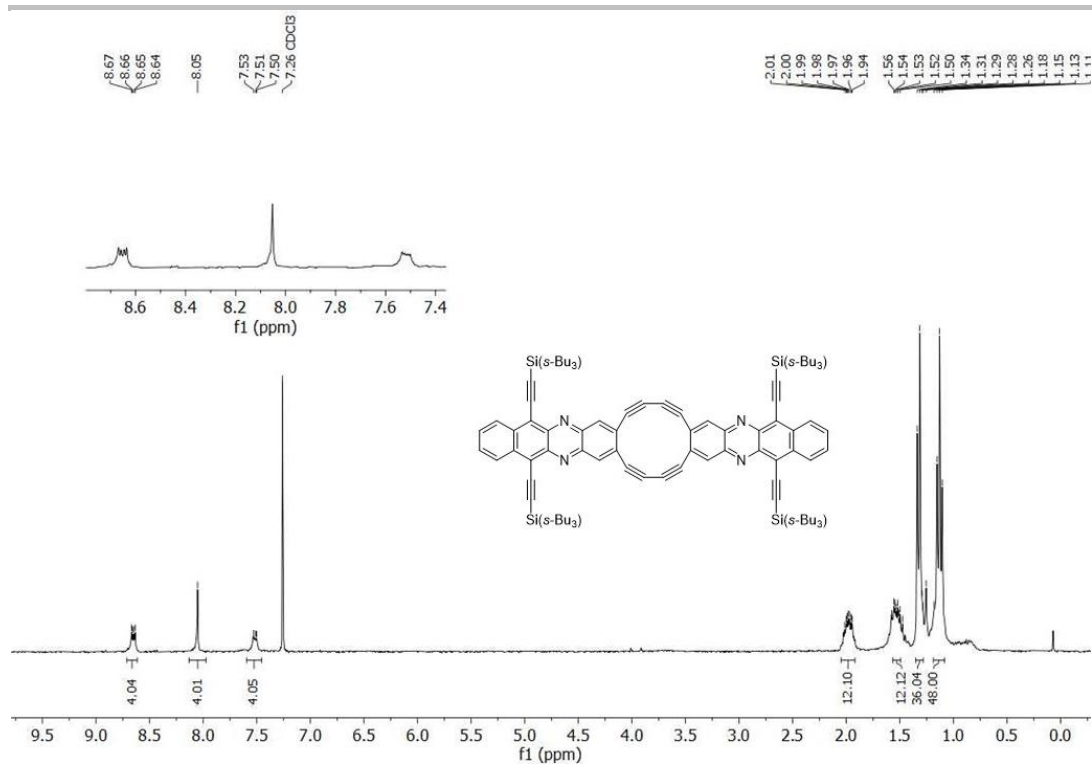

**Figure S28.** <sup>1</sup>H NMR spectrum (600 MHz, CDCl<sub>3</sub>, 295 K) of **3c2**.

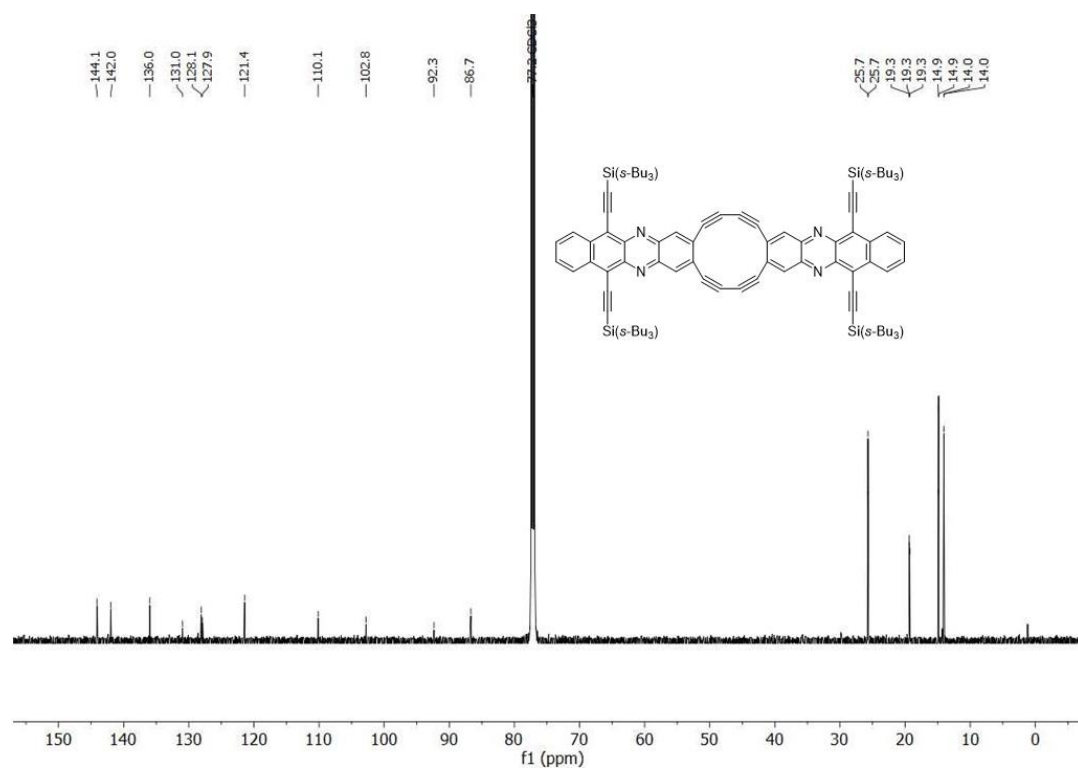

**Figure S29.** <sup>13</sup>C NMR spectrum (151 MHz, CDCl<sub>3</sub>, 295 K) of **3c2**.

## SUPPORTING INFORMATION

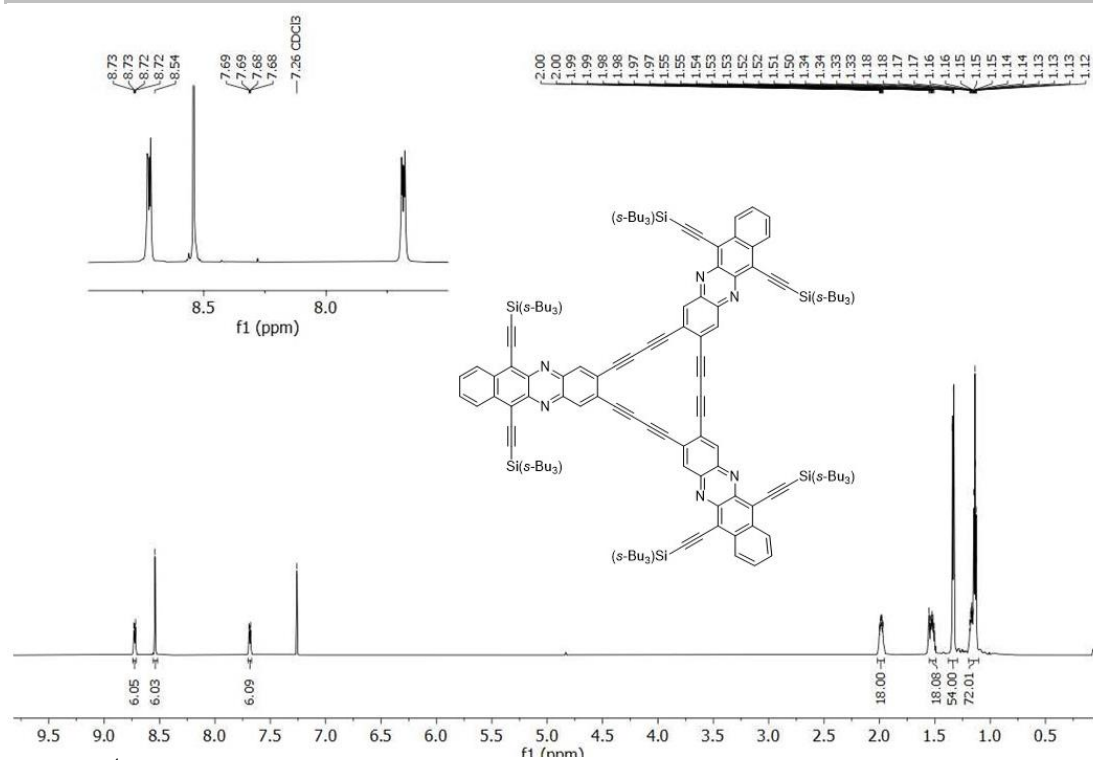

**Figure S30.**  $^1\text{H}$  NMR spectrum (700 MHz,  $\text{CDCl}_3$ , 295 K) of **3c3**.

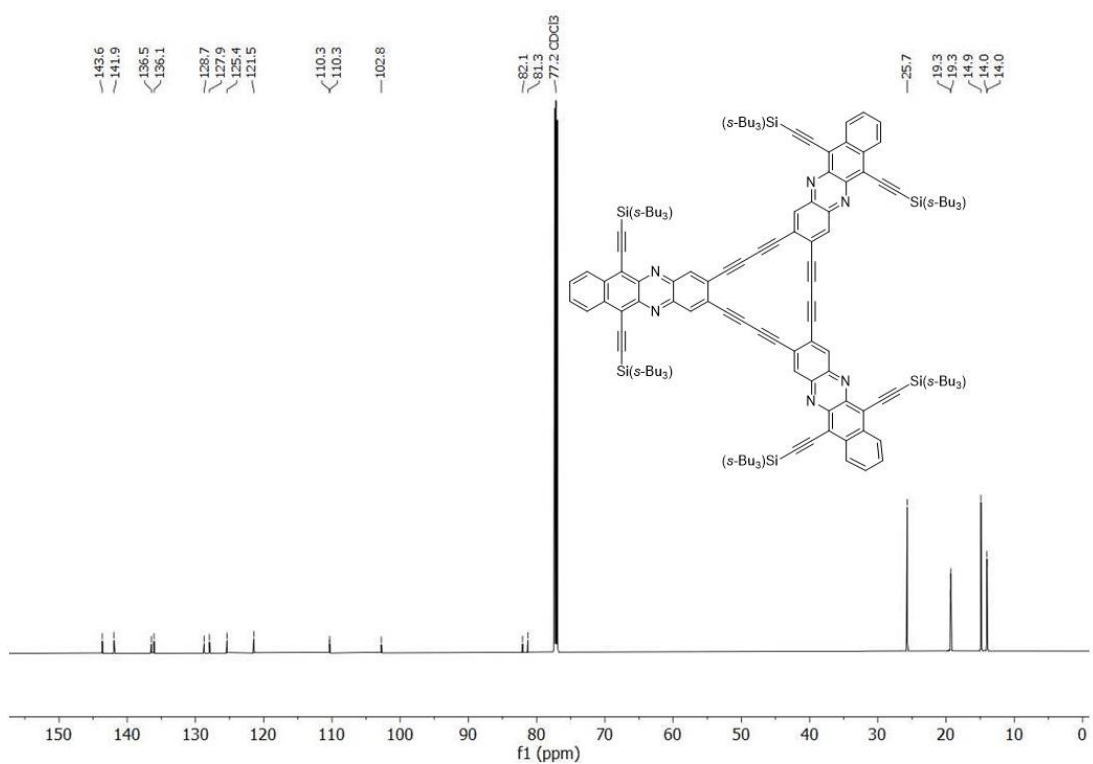

**Figure S31.**  $^{13}\text{C}\{^1\text{H}\}$  NMR spectrum (176 MHz,  $\text{CDCl}_3$ , 295 K) of **3c3**.



## SUPPORTING INFORMATION

## 2.3. UV-vis spectra

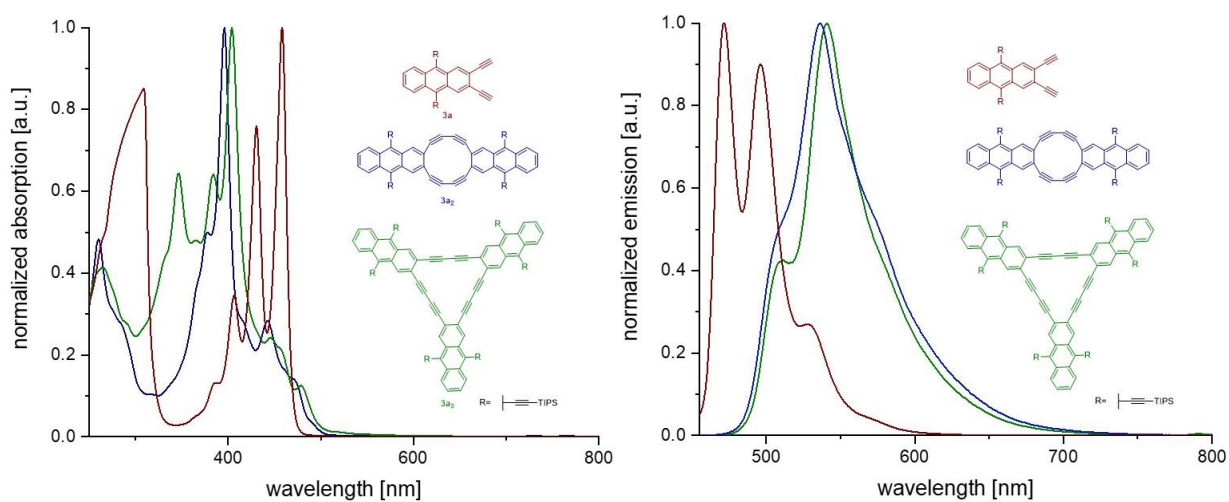

**Figure S32.** Normalized absorption (left) and emission (right) spectra of **3a**, **3a<sub>2</sub>** and **3a<sub>3</sub>** in DCM.

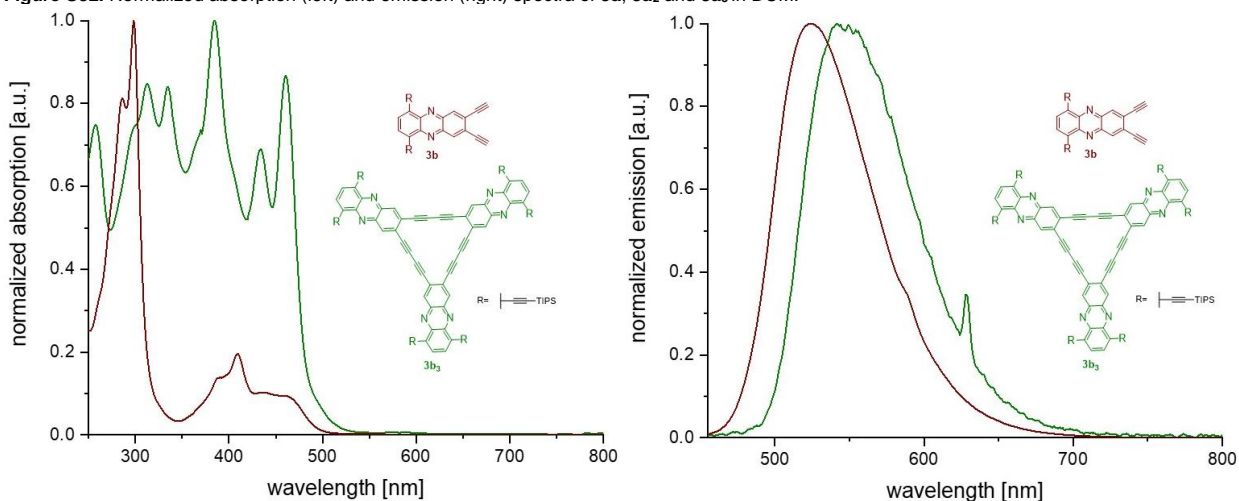

**Figure S33.** Normalized absorption (left) and emission (right) spectra of **3b** and **3b<sub>2</sub>** in DCM. The peak around 640 nm is due to the double excitation wavelength.

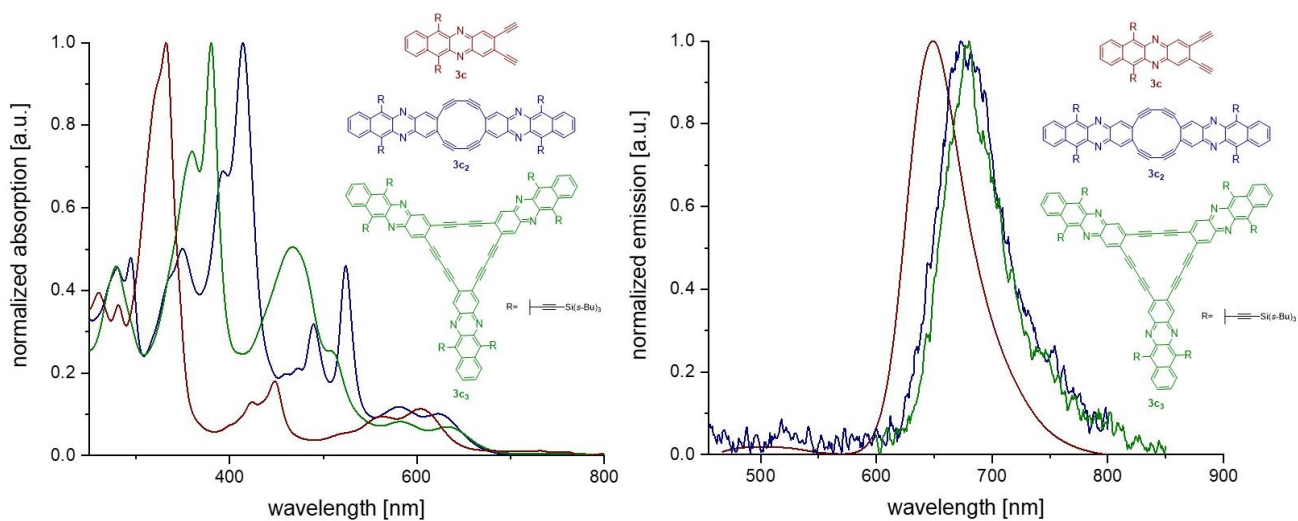

**Figure S34.** Normalized absorption (left) and emission (right) spectra of **3c**, **3c<sub>2</sub>** and **3c<sub>3</sub>** in DCM. The emission of **3c<sub>2</sub>** and **3c<sub>3</sub>** is very faint.

## SUPPORTING INFORMATION

## 2.4 Cyclic Voltammetry

The cyclic voltammetry (CV) experiments were carried out using a platinum working electrode, a platinum wire auxiliary electrode, a silver wire reference electrode, a 0.1 mol L<sup>-1</sup> NBu<sub>4</sub>PF<sub>6</sub> solution in degassed, dry DCM, and ferrocene/ferrocenium as the reference redox system and internal standard (-5.1 eV)<sup>[S8]</sup> at room temperature and 0.2 V s<sup>-1</sup> or 0.5 V s<sup>-1</sup>. To determine the first reduction potentials (E<sub>(0/-)</sub>) of the samples and the first oxidation potential of ferrocene, the half-wave potentials were used. For irreversible redox events, the maximum of the peak was used. For **3a**<sub>2</sub> no CV spectrum could be obtained due to low solubility.

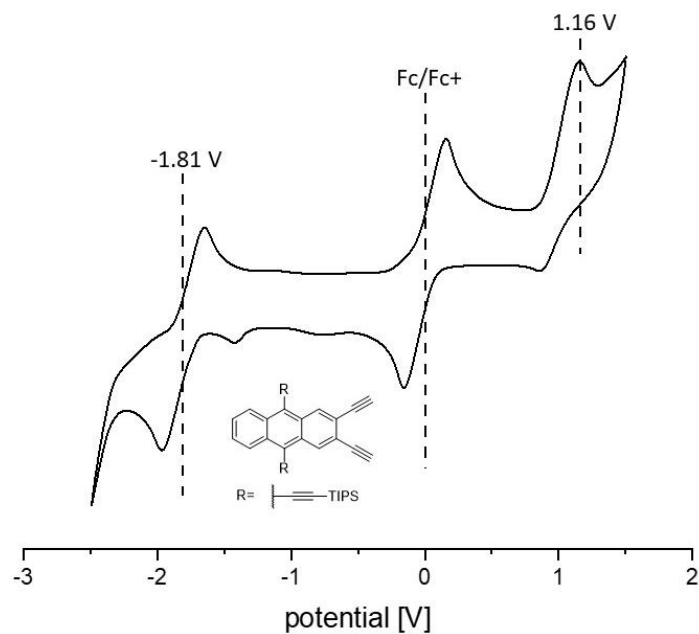

Figure S35. CV spectrum of **3a** containing ferrocene as internal standard.

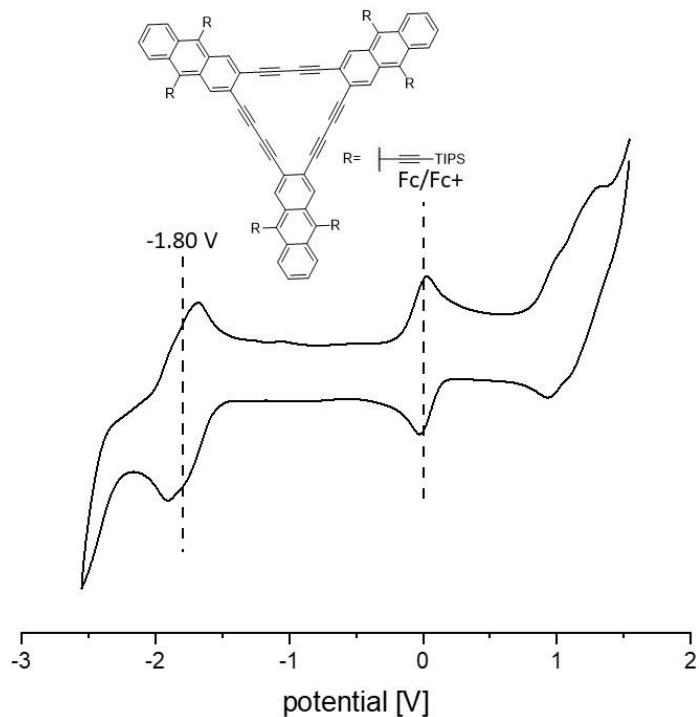

Figure S36. CV spectrum of **3a**<sub>3</sub> containing ferrocene as internal standard.

## SUPPORTING INFORMATION

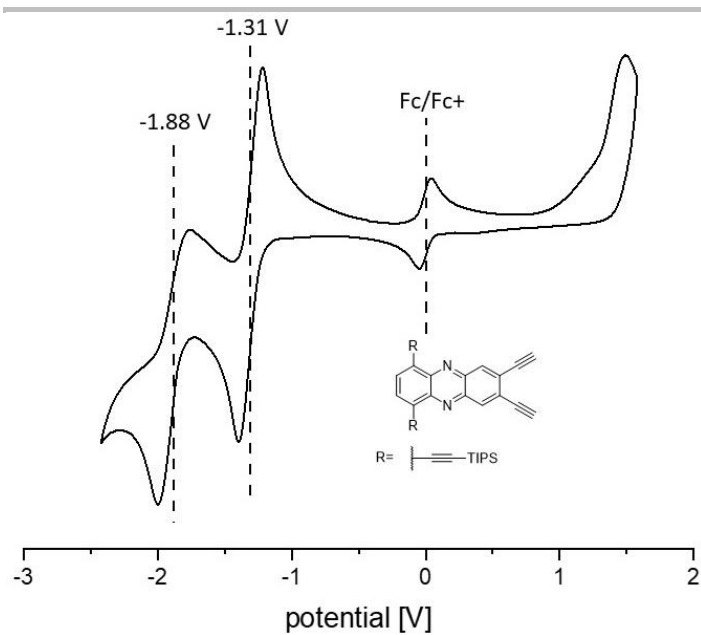

Figure S37. CV spectrum of **3b** containing ferrocene as internal standard.

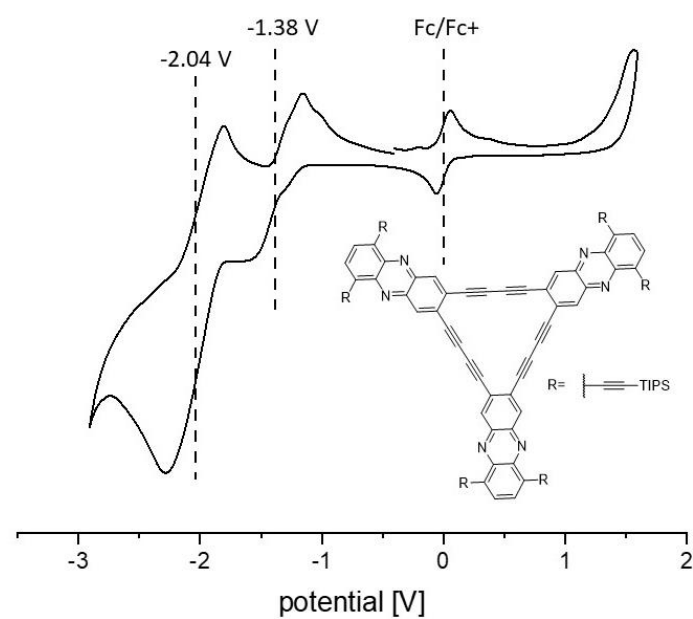

Figure S38. CV spectrum of **3b<sub>3</sub>** containing ferrocene as internal standard.

## SUPPORTING INFORMATION

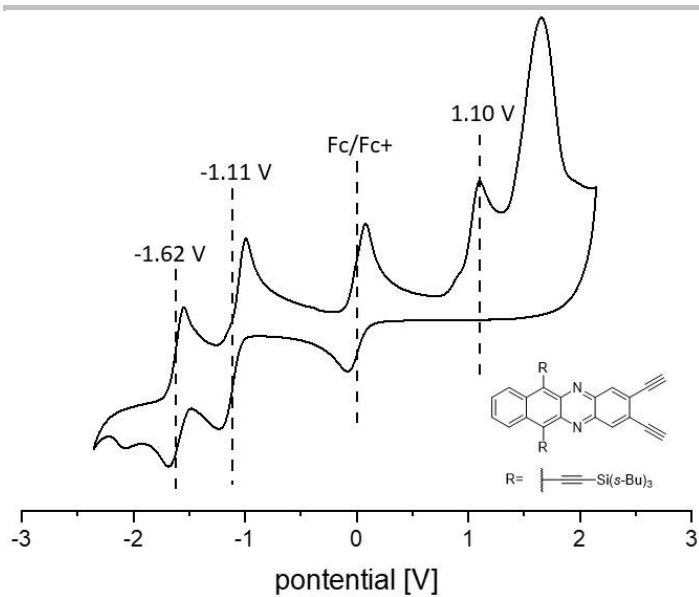

Figure S39. CV spectrum of 3c containing ferrocene as internal standard.

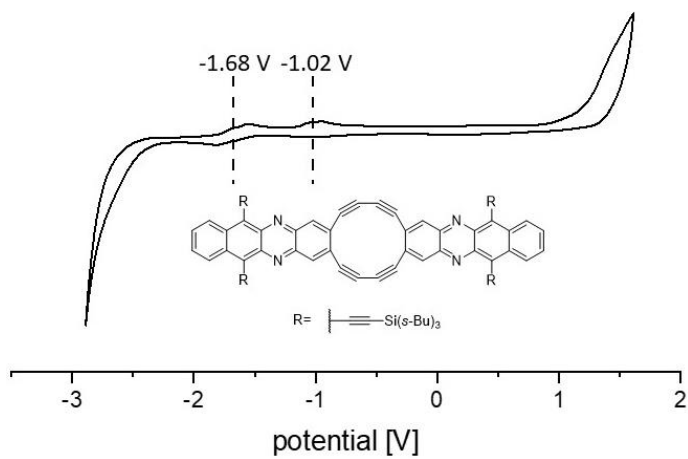

Figure S40. CV spectrum of 3c<sub>2</sub>.

## SUPPORTING INFORMATION

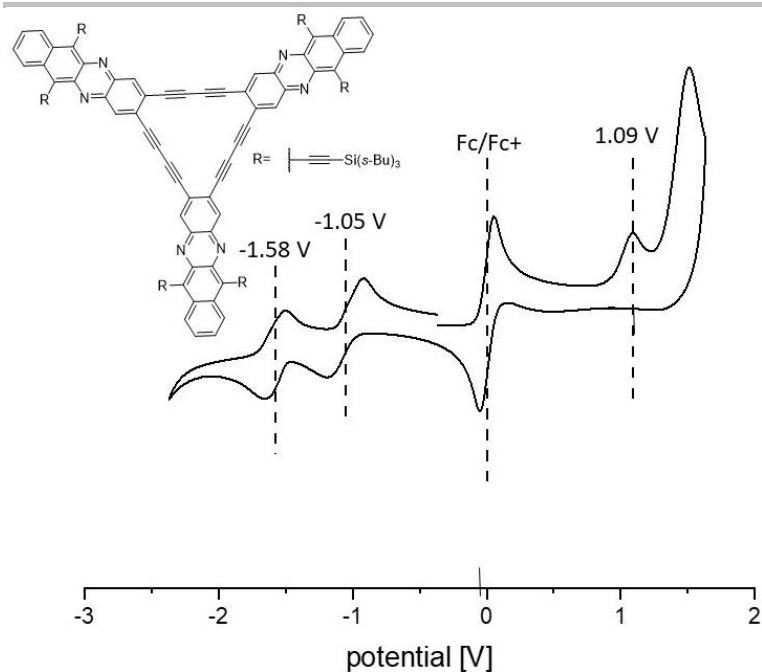

**Figure S41.** CV spectrum of **3c<sub>3</sub>** containing ferrocene as internal standard. Here the first cycle is shown, due to decomposition on the electrode.

**Table S1.** Summary of the ionization and reduction potentials. Irreversible redox events are marked with nr.

| Compound              | E(0/+) [eV] | E(0/-) [eV] | E(-/2-) [eV] |
|-----------------------|-------------|-------------|--------------|
| <b>3a</b>             | 1.16 (nr)   | -1.81       | -            |
| <b>3a<sub>3</sub></b> | -           | -1.80       | -            |
| <b>3b</b>             | -           | -1.31       | -1.88        |
| <b>3b<sub>3</sub></b> | -           | -1.38       | -2.04        |
| <b>3c</b>             | 1.10 (nr)   | -1.11       | -1.62        |
| <b>3c<sub>2</sub></b> | -           | -1.02       | -1.68        |
| <b>3c<sub>3</sub></b> | 1.09 (nr)   | -1.05       | -1.58        |

## 2.5 Hirshfeld Analysis

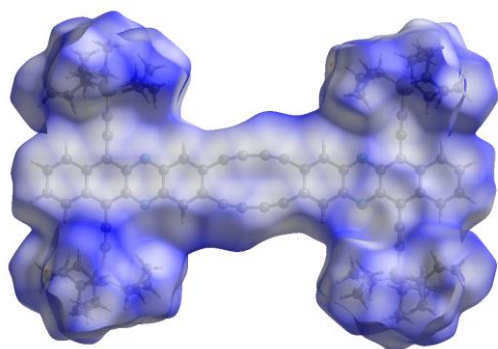

**Figure S42.**  $d_{\text{norm}}$  Hirshfeld surface of trimer **3c<sub>2</sub>**.

## SUPPORTING INFORMATION

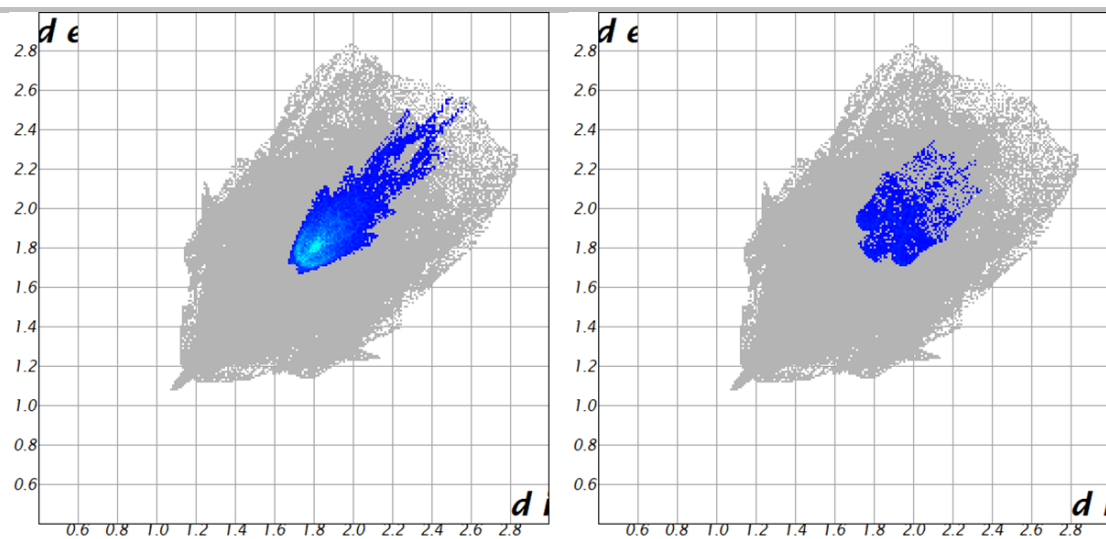

Figure S43. Fingerprint plot of trimer **3c<sub>2</sub>**, with C-C (left) and C-N (right) contacts.

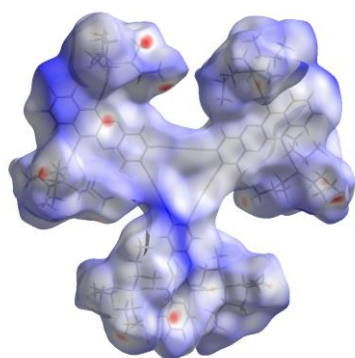

Figure S44.  $d_{\text{norm}}$  Hirshfeld surface of trimer **3c<sub>3</sub>**.

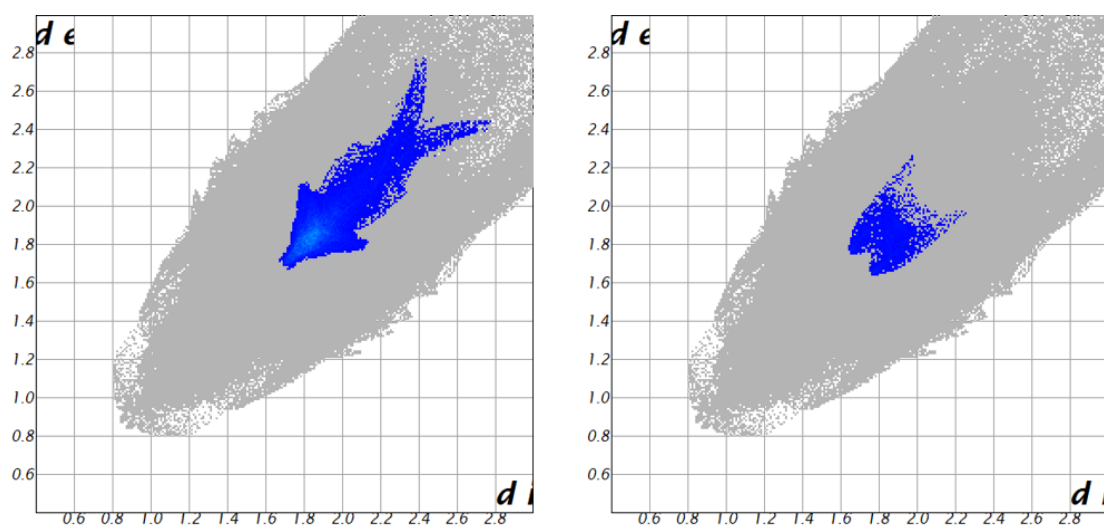

Figure S45. Fingerprint plot of trimer **3c<sub>3</sub>**, with C-C (left) and C-N (right) contacts.

## SUPPORTING INFORMATION

## 2.6 TGA/DSC Measurements

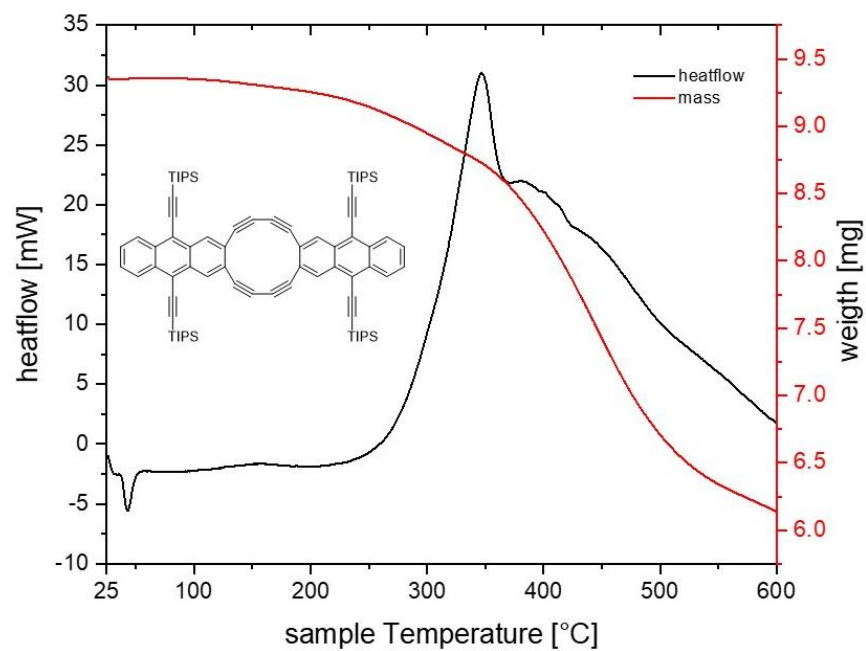

Figure S46. TGA/DSC spectrum of **3a<sub>2</sub>** under a nitrogen atmosphere and a heatrate of 10 K/min.

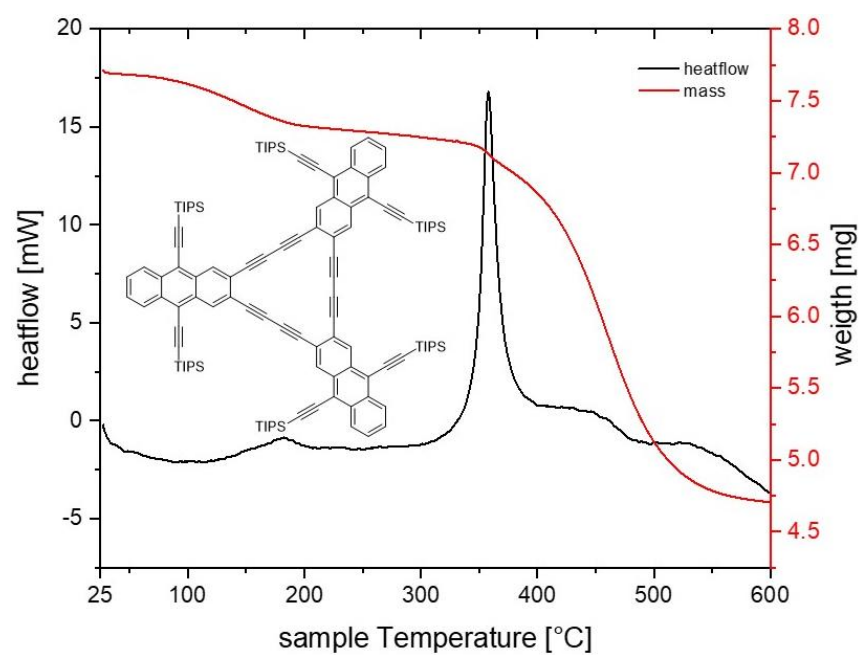

Figure S47. TGA/DSC spectrum of **3a<sub>3</sub>** under a nitrogen atmosphere and a heatrate of 10 K/min.

## SUPPORTING INFORMATION

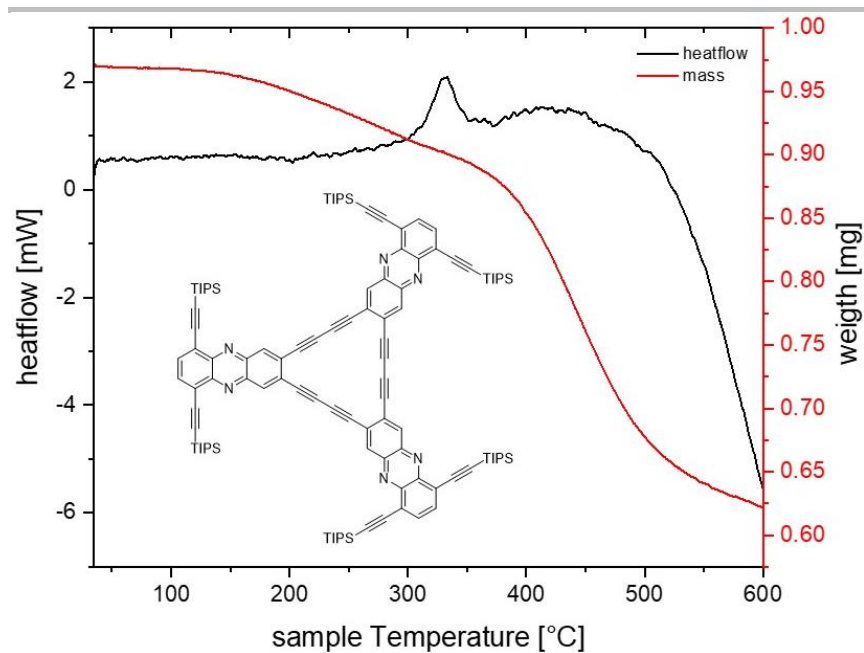

**Figure S48.** TGA/DSC spectrum of **3b3** under a nitrogen atmosphere and a heatrate of 10 K/min. (The sample was drop-casted from a DCM solution into the crucible: Hence a mass lost at the beginning is probably due to remaining solvent).

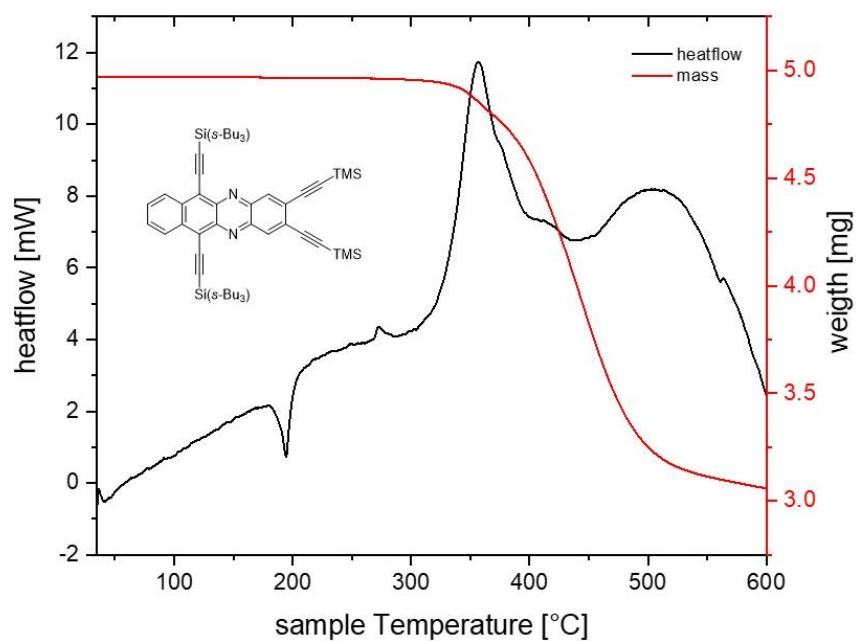

**Figure S49.** TGA/DSC spectrum of **2c** under a nitrogen atmosphere and a heatrate of 10 K/min.



## SUPPORTING INFORMATION

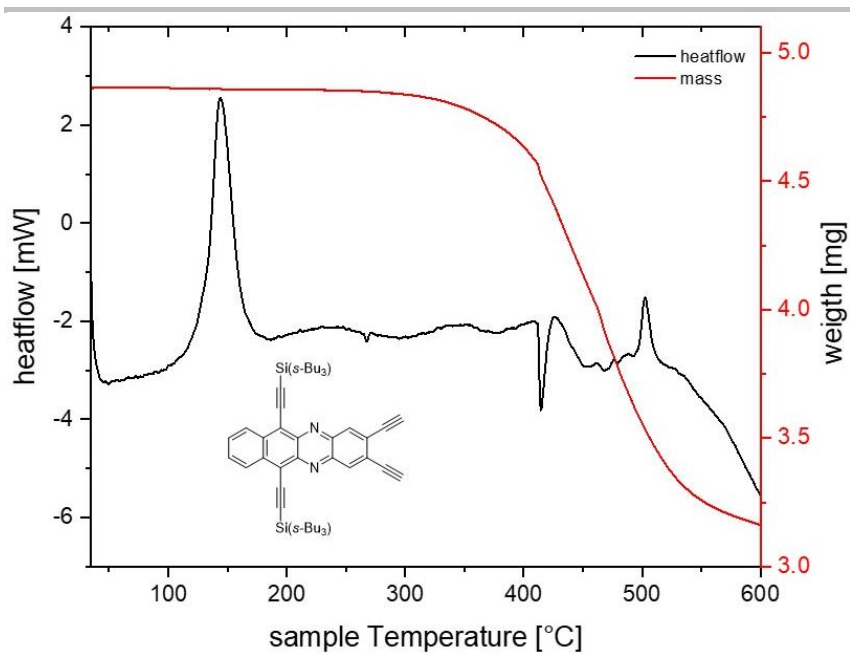

Figure S50. TGA/DSC spectrum of **3c** under a nitrogen atmosphere and a heatrate of 10 K/min.

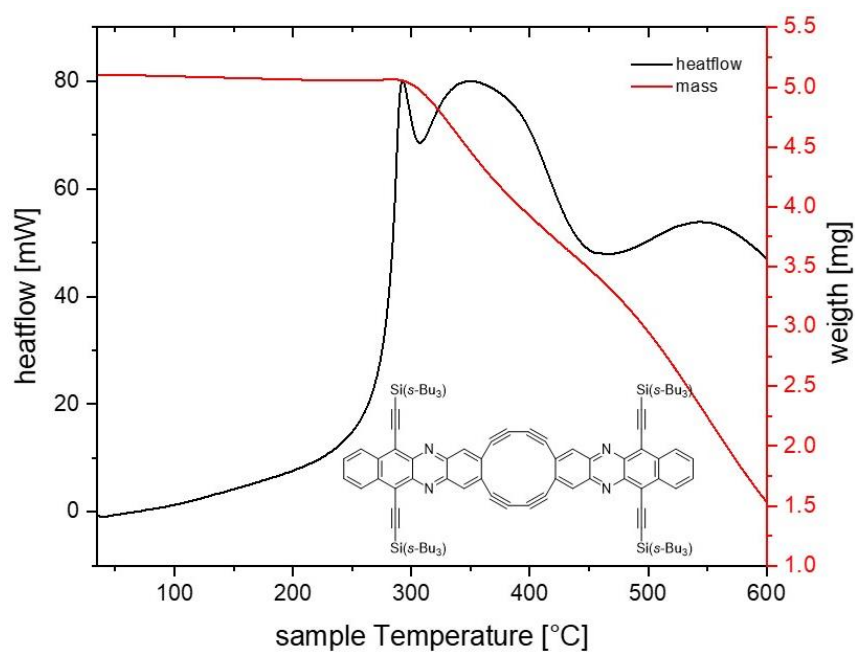

Figure S51. TGA/DSC spectrum of **3c<sub>2</sub>** under a nitrogen atmosphere and a heatrate of 10 K/min.

## SUPPORTING INFORMATION

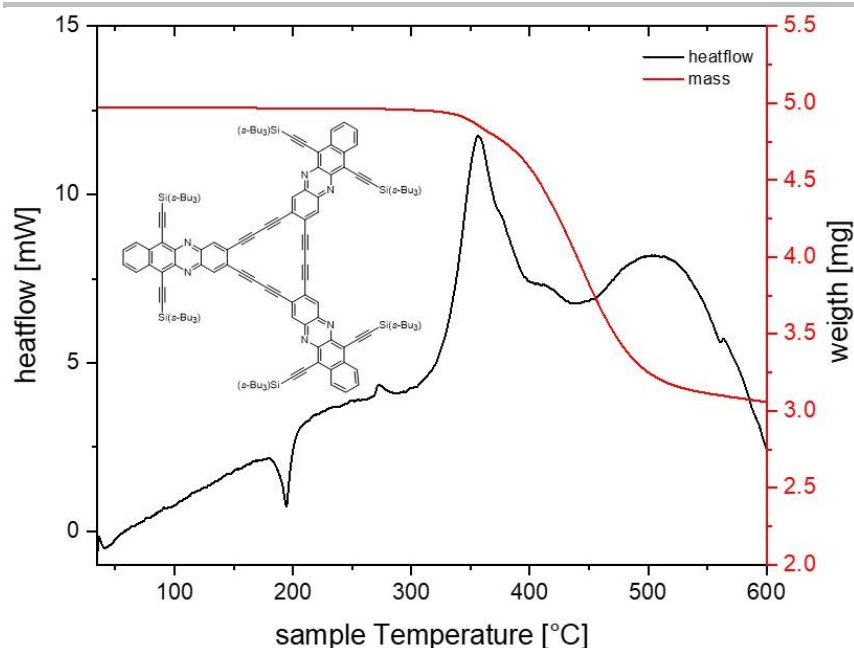

Figure S52. TGA/DSC spectrum of **3c<sub>3</sub>** under a nitrogen atmosphere and a heatrate of 10 K/min.

## 2.7 OFET Fabrication and Measurement

A sliced, highly doped silicon wafer with 100 nm thick thermally grown SiO<sub>2</sub> was cleaned by ultra-sonication in acetone, isopropanol and ethanol successively for 10 min. It was washed with water and dried in a stream of nitrogen. The wafer was placed in freshly produced Caro's acid and heated to 100 °C for 20 min. After cleaning with water and drying, a 150mM solution of Al(NO<sub>3</sub>)<sub>3</sub> · 9 H<sub>2</sub>O in ethanol was spin-coated (5000 rpm; 40 s) onto the substrate. Right after that the wafer was heated to 300 °C for 30 min. For the formation of the self-assembled monolayer, the substrate was placed in a 15.0 mM solution of 12-cyclohexyldodecylphosphonic acid (CDPA)<sup>[S9]</sup> in isopropanol for 16 h. Then the substrate was cleaned with ultra-sonication in isopropanol for 10 min, rinsed with water and dried in a stream of nitrogen. The capacitance of the dielectric layer is 26.5 nF cm<sup>-2</sup>.

Drop-cast films were prepared by dropping the prepared solution (**3c<sub>2</sub>**: toluene, 0.5 mg/mL; **3c<sub>3</sub>**: DCM, 0.5 mg/mL) onto the substrate and covering the wafer against unwanted wind flows. To form the electrodes, a 40 nm thick layer of silver was deposited through a shadow mask onto the organic layer in a vacuum evaporator at a pressure below 2 × 10<sup>-6</sup> bar. Transistor characteristics were measured with a semiconductor characterization system (Keithley 4200-SCS) in a nitrogen filled glove box. The field effect mobilities were determined in the saturated regime using the equation  $\mu = \left( \frac{\partial (I_{DS})^{1/2}}{\partial V_G} \right)^2 \frac{2L}{WC_i}$ , where  $I_{DS}$  is the source-drain current, W is the channel width, L the channel length,  $C_i$  is the capacitance per unit area of the gate dielectric layer,  $\mu$  is the field effect mobility.<sup>[S10]</sup>

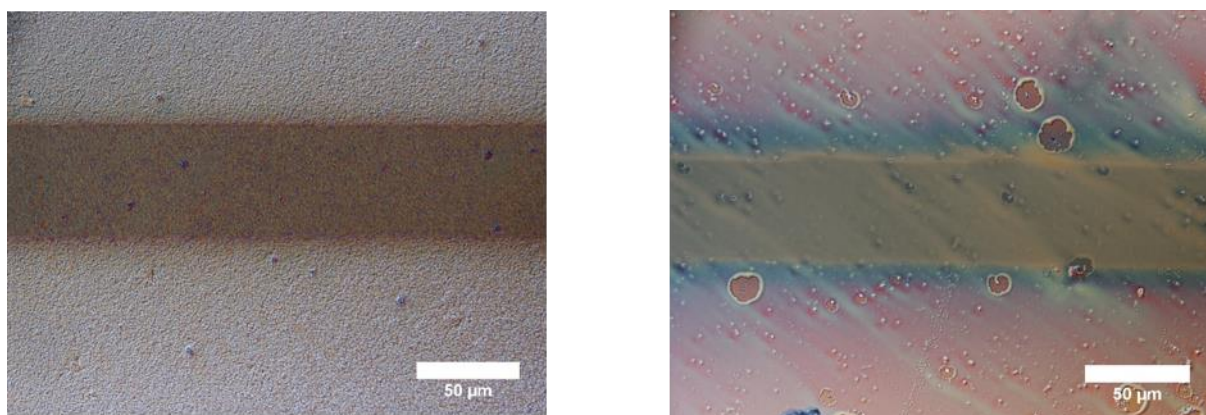

Figure S53. Exemplary measured channels of dimer **3c<sub>2</sub>** (left) and trimer **3c<sub>3</sub>** (right) (50x magnification, cross-polarized filters).

## SUPPORTING INFORMATION

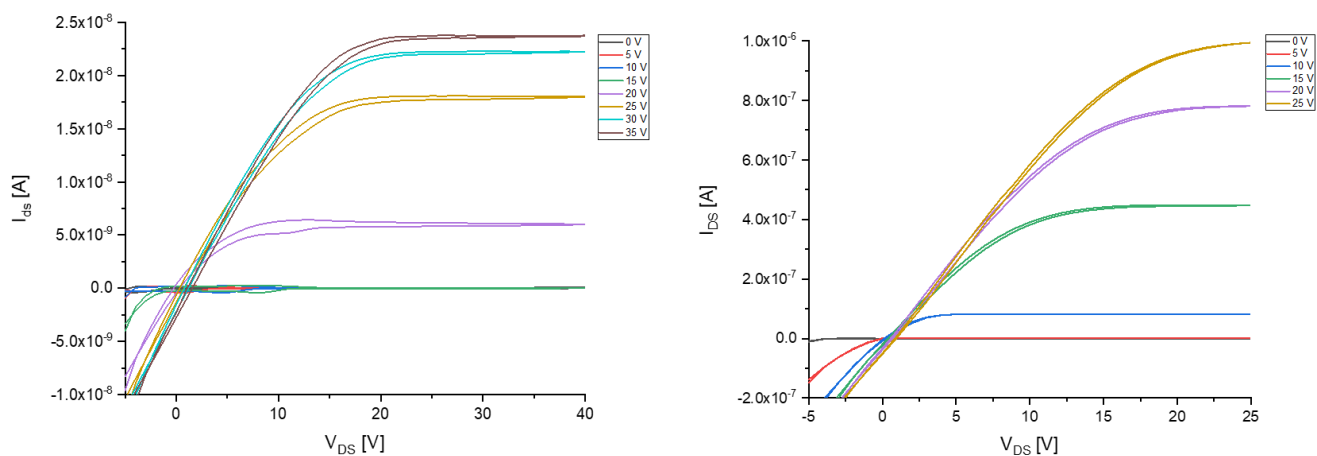

Figure S54. Output characteristics of dimer **3c<sub>2</sub>** (left) and trimer **3c<sub>3</sub>** (right).

## 2.6 Crystallographic Data

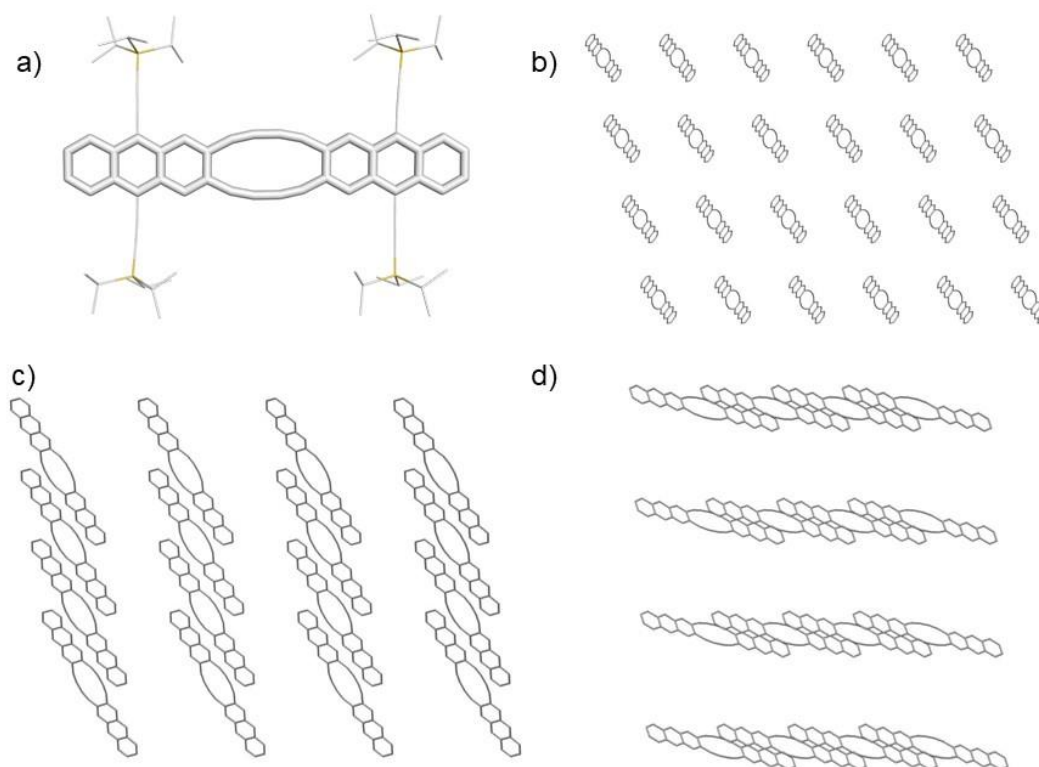

Figure S55. Single crystal Structure of **3a<sub>2</sub>**. a) single molecule, b) packing viewed along crystallographic axis a (TIPS-ethynyl groups were removed for clarity), c) packing viewed along crystallographic axis b (TIPS-ethynyl groups were removed for clarity), d) packing viewed along crystallographic axis c (TIPS-ethynyl groups were removed for clarity).

## SUPPORTING INFORMATION

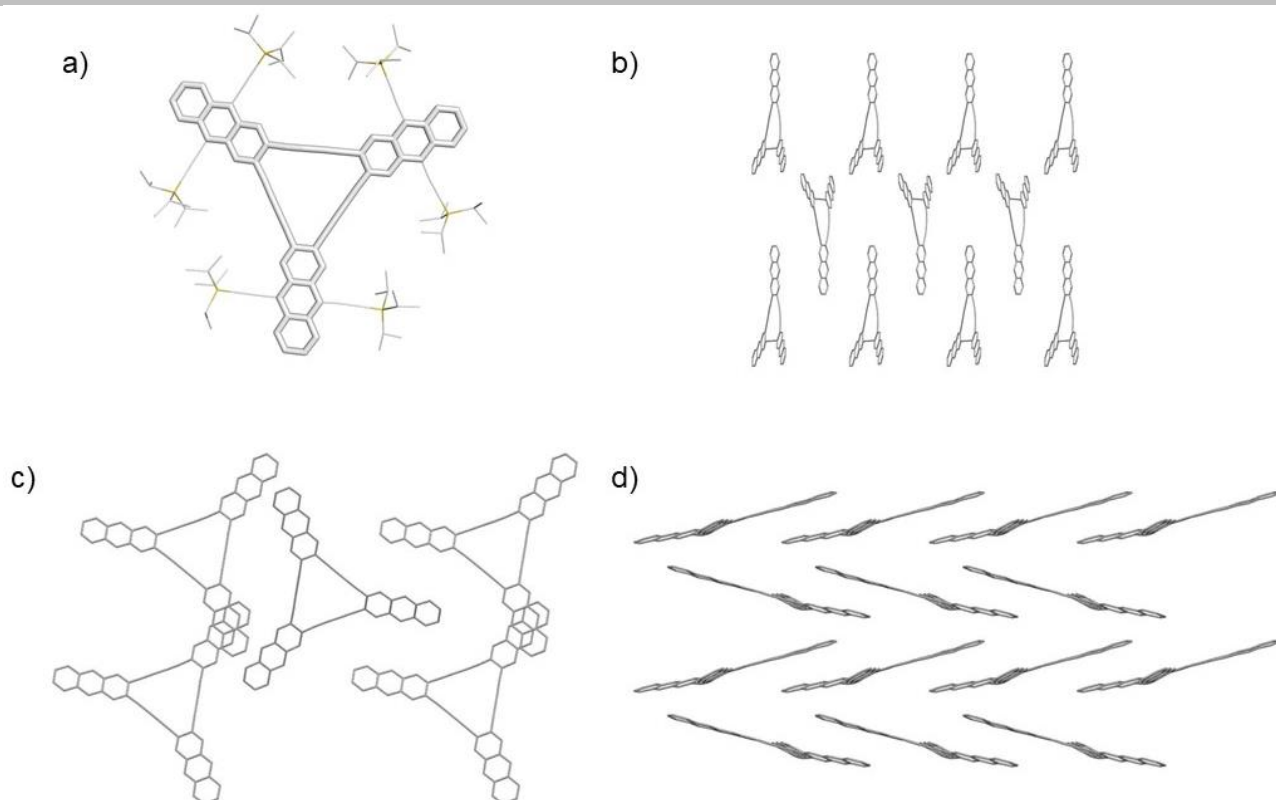

**Figure S56.** Single crystal Structure of **3a<sub>3</sub>**. a) single molecule, b) packing viewed along crystallographic axis a (TIPS-ethynyl groups were removed for clarity), c) packing viewed along crystallographic axis b (TIPS-ethynyl groups were removed for clarity), d) packing viewed along crystallographic axis c (TIPS-ethynyl groups were removed for clarity).

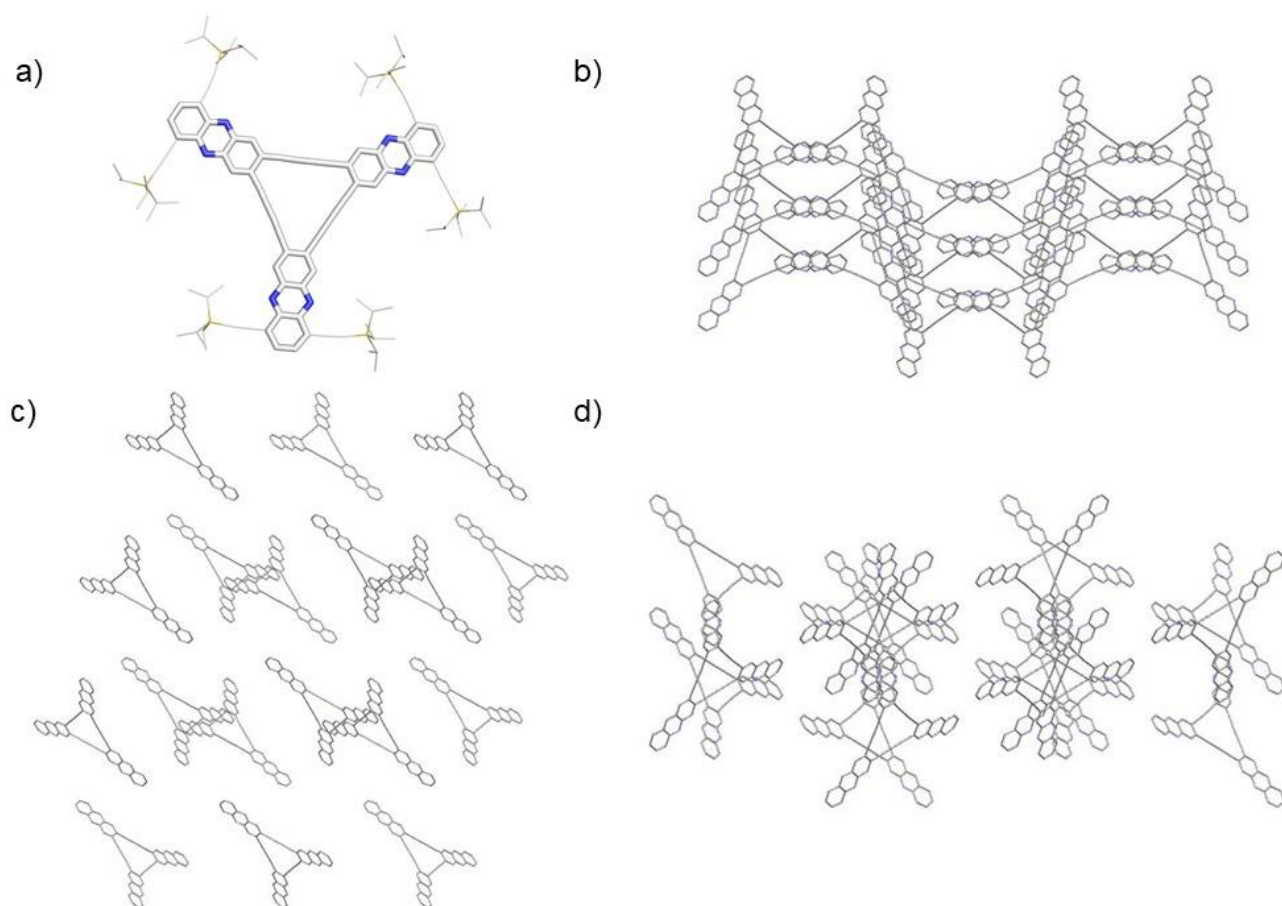

## SUPPORTING INFORMATION

**Figure S57.** Single crystal Structure of **3b<sub>3</sub>**. a) single molecule, b) packing viewed along crystallographic axis a (TIPS-ethynyl groups were removed for clarity), c) packing viewed along crystallographic axis b (TIPS-ethynyl groups were removed for clarity), d) packing viewed along crystallographic axis c (TIPS-ethynyl groups were removed for clarity).

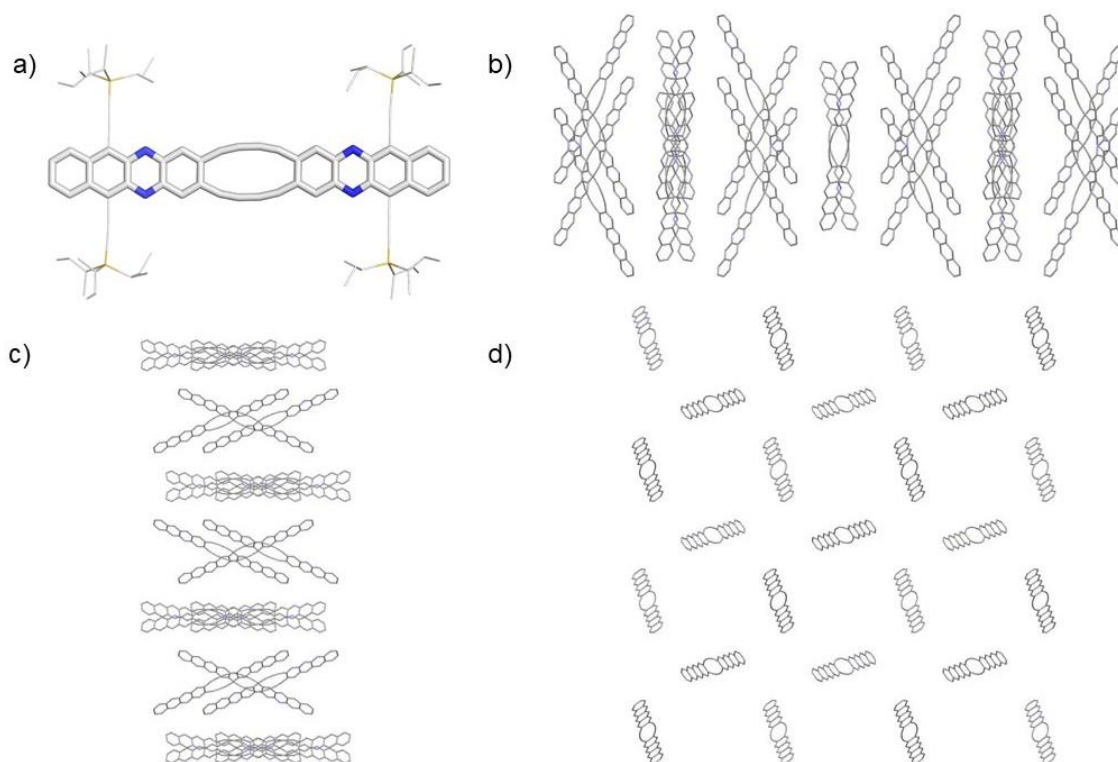

**Figure S58.** Single crystal Structure of **3c<sub>2</sub>**. a) single molecule, b) packing viewed along crystallographic axis a (TIPS-ethynyl groups were removed for clarity), c) packing viewed along crystallographic axis b (TIPS-ethynyl groups were removed for clarity), d) packing viewed along crystallographic axis c (TIPS-ethynyl groups were removed for clarity).

## SUPPORTING INFORMATION

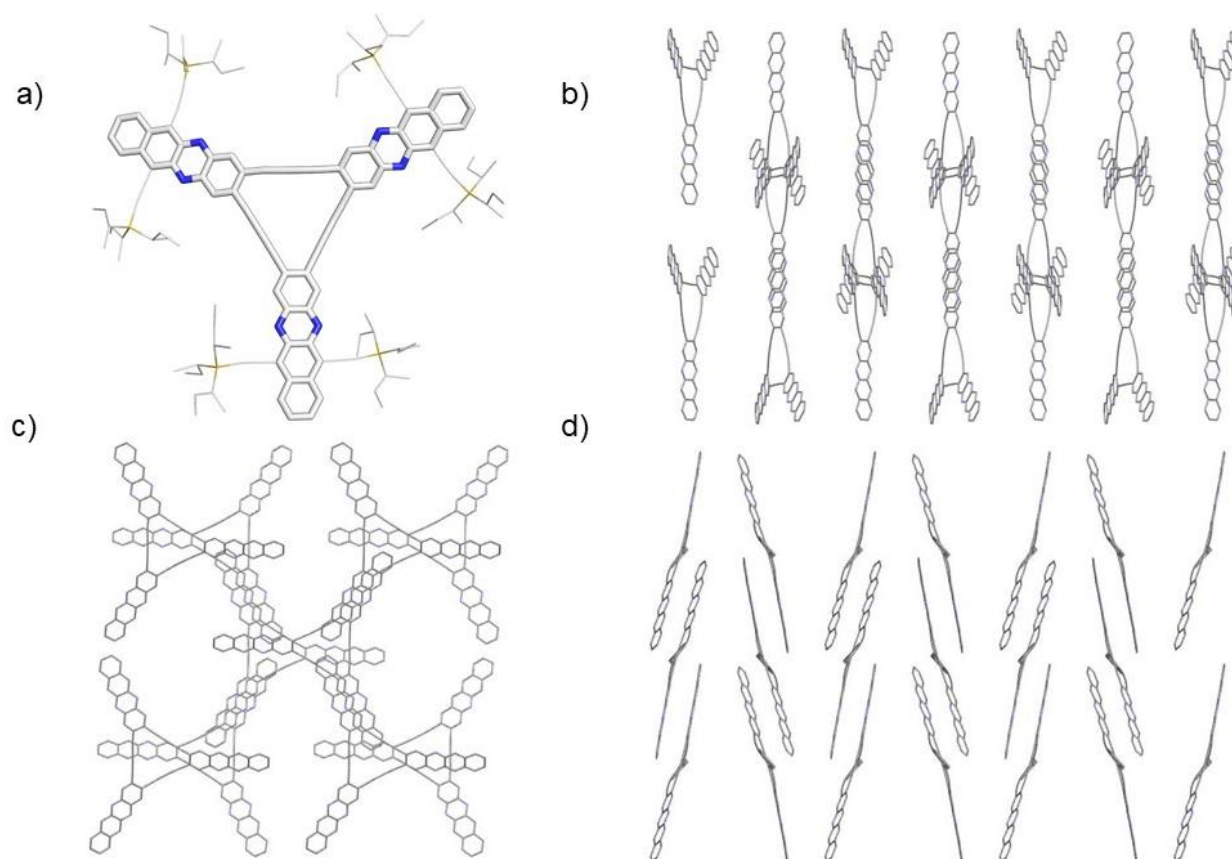

**Figure S59.** Single crystal Structure of **3c<sub>3</sub>**. a) single molecule, b) packing viewed along crystallographic axis a (TIPS-ethynyl groups were removed for clarity), c) packing viewed along crystallographic axis b (TIPS-ethynyl groups were removed for clarity), d) packing viewed along crystallographic axis c (TIPS-ethynyl groups were removed for clarity).

**Table S2.** Crystal structure, crystal data and structure refinement of **3a<sub>2</sub>** (CCDC 2106563).

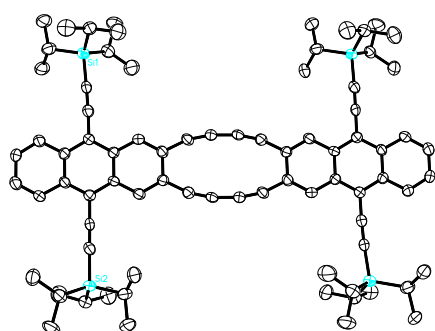

Empirical formula  
Formula weight  
Temperature  
Wavelength  
Crystal system  
Space group  
Z  
Unit cell dimensions  
Volume  
Density (calculated)

C<sub>80</sub>H<sub>96</sub>Si<sub>4</sub>  
1169.92  
200(2) K  
1.54178 Å  
triclinic  
P  $\bar{1}$   
1  
a = 8.4541(12) Å  
b = 13.729(2) Å  
c = 15.529(2) Å  
1727.4(4) Å<sup>3</sup>  
1.12 g/cm<sup>3</sup>

$\alpha$  = 76.569(11) deg.  
 $\beta$  = 80.562(11) deg.  
 $\gamma$  = 85.128(12) deg.

## SUPPORTING INFORMATION

|                                   |                                             |
|-----------------------------------|---------------------------------------------|
| Absorption coefficient            | 1.11 mm <sup>-1</sup>                       |
| Crystal shape                     | needle                                      |
| Crystal size                      | 0.103 x 0.022 x 0.015 mm <sup>3</sup>       |
| Crystal colour                    | orange                                      |
| Theta range for data collection   | 3.0 to 51.9 deg.                            |
| Index ranges                      | -8 ≤ h ≤ 6, -14 ≤ k ≤ 14, -15 ≤ l ≤ 15      |
| Reflections collected             | 11245                                       |
| Independent reflections           | 3835 (R(int) = 0.1298)                      |
| Observed reflections              | 1778 (I > 2σ(I))                            |
| Absorption correction             | Semi-empirical from equivalents             |
| Max. and min. transmission        | 1.61 and 0.71                               |
| Refinement method                 | Full-matrix least-squares on F <sup>2</sup> |
| Data/restraints/parameters        | 3835 / 308 / 391                            |
| Goodness-of-fit on F <sup>2</sup> | 1.01                                        |
| Final R indices (I > 2σ(I))       | R1 = 0.077, wR2 = 0.152                     |
| Largest diff. peak and hole       | 0.26 and -0.29 eÅ <sup>-3</sup>             |

**Table S3.** Crystal structure, crystal data and structure refinement of **3a<sub>3</sub>** (CCDC 2106564).

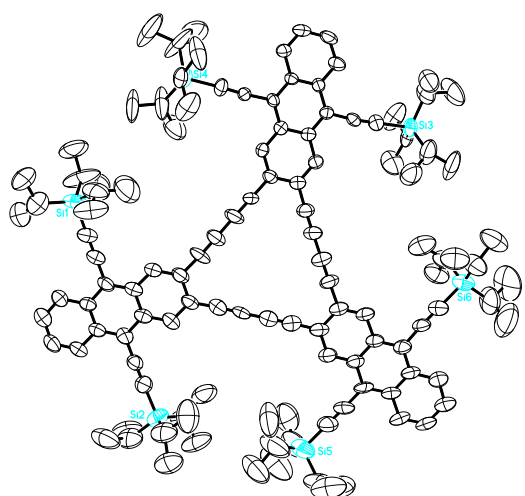

|                                   |                                                                            |                                                   |
|-----------------------------------|----------------------------------------------------------------------------|---------------------------------------------------|
| Empirical formula                 | C <sub>122.50</sub> H <sub>144.50</sub> Cl <sub>7.50</sub> Si <sub>6</sub> |                                                   |
| Formula weight                    | 2051.29                                                                    |                                                   |
| Temperature                       | 200(2) K                                                                   |                                                   |
| Wavelength                        | 1.54178 Å                                                                  |                                                   |
| Crystal system                    | monoclinic                                                                 |                                                   |
| Space group                       | P2 <sub>1</sub>                                                            |                                                   |
| Z                                 | 2                                                                          |                                                   |
| Unit cell dimensions              | a = 14.7849(7) Å<br>b = 14.5900(6) Å<br>c = 29.3325(14) Å                  | α = 90 deg.<br>β = 100.692(4) deg.<br>γ = 90 deg. |
| Volume                            | 6217.5(5) Å <sup>3</sup>                                                   |                                                   |
| Density (calculated)              | 1.10 g/cm <sup>3</sup>                                                     |                                                   |
| Absorption coefficient            | 2.44 mm <sup>-1</sup>                                                      |                                                   |
| Crystal shape                     | plank                                                                      |                                                   |
| Crystal size                      | 0.102 x 0.043 x 0.032 mm <sup>3</sup>                                      |                                                   |
| Crystal colour                    | orange                                                                     |                                                   |
| Theta range for data collection   | 3.1 to 45.5 deg.                                                           |                                                   |
| Index ranges                      | -13 ≤ h ≤ 13, -12 ≤ k ≤ 13, -27 ≤ l ≤ 27                                   |                                                   |
| Reflections collected             | 61444                                                                      |                                                   |
| Independent reflections           | 8818 (R(int) = 0.2018)                                                     |                                                   |
| Observed reflections              | 5041 (I > 2σ(I))                                                           |                                                   |
| Absorption correction             | Semi-empirical from equivalents                                            |                                                   |
| Max. and min. transmission        | 1.57 and 0.58                                                              |                                                   |
| Refinement method                 | Full-matrix least-squares on F <sup>2</sup>                                |                                                   |
| Data/restraints/parameters        | 8818 / 3406 / 1245                                                         |                                                   |
| Goodness-of-fit on F <sup>2</sup> | 1.03                                                                       |                                                   |
| Final R indices (I > 2σ(I))       | R1 = 0.084, wR2 = 0.202                                                    |                                                   |
| Absolute structure parameter      | 0.11(7)                                                                    |                                                   |
| Largest diff. peak and hole       | 0.39 and -0.26 eÅ <sup>-3</sup>                                            |                                                   |

**Table S4.** Crystal structure, crystal data and structure refinement of **3b<sub>3</sub>** (CCDC 2106565).

## SUPPORTING INFORMATION

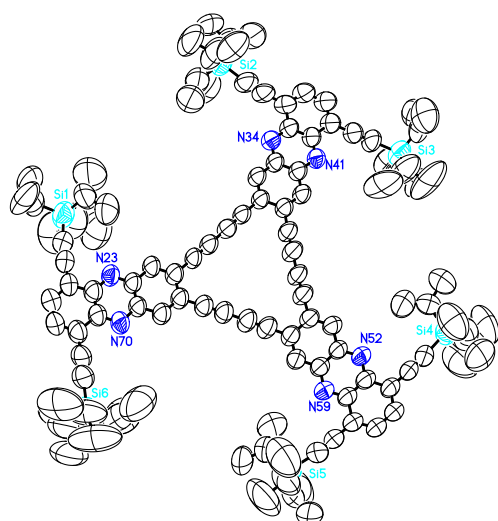

|                                      |                                                                   |                           |
|--------------------------------------|-------------------------------------------------------------------|---------------------------|
| Empirical formula                    | $C_{114}H_{138}N_6Si_6$                                           |                           |
| Formula weight                       | 1760.84                                                           |                           |
| Temperature                          | 200(2) K                                                          |                           |
| Wavelength                           | 1.54178 Å                                                         |                           |
| Crystal system                       | monoclinic                                                        |                           |
| Space group                          | $C2/c$                                                            |                           |
| Z                                    | 8                                                                 |                           |
| Unit cell dimensions                 | $a = 43.659(2)$ Å                                                 | $\alpha = 90$ deg.        |
|                                      | $b = 13.3478(5)$ Å                                                | $\beta = 107.747(3)$ deg. |
|                                      | $c = 41.943(3)$ Å                                                 | $\gamma = 90$ deg.        |
| Volume                               | $23279(2)$ Å <sup>3</sup>                                         |                           |
| Density (calculated)                 | 1.00 g/cm <sup>3</sup>                                            |                           |
| Absorption coefficient               | 1.00 mm <sup>-1</sup>                                             |                           |
| Crystal shape                        | plank                                                             |                           |
| Crystal size                         | 0.420 x 0.108 x 0.052 mm <sup>3</sup>                             |                           |
| Crystal colour                       | orange                                                            |                           |
| Theta range for data collection      | 2.1 to 42.5 deg.                                                  |                           |
| Index ranges                         | $-38 \leq h \leq 37$ , $-11 \leq k \leq 5$ , $-36 \leq l \leq 36$ |                           |
| Reflections collected                | 28438                                                             |                           |
| Independent reflections              | 8048 ( $R(\text{int}) = 0.0674$ )                                 |                           |
| Observed reflections                 | 4128 ( $I > 2\sigma(I)$ )                                         |                           |
| Absorption correction                | Semi-empirical from equivalents                                   |                           |
| Max. and min. transmission           | 1.48 and 0.65                                                     |                           |
| Refinement method                    | Full-matrix least-squares on $F^2$                                |                           |
| Data/restraints/parameters           | 8048 / 3126 / 1135                                                |                           |
| Goodness-of-fit on $F^2$             | 1.23                                                              |                           |
| Final R indices ( $I > 2\sigma(I)$ ) | $R1 = 0.119$ , $wR2 = 0.326$                                      |                           |
| Largest diff. peak and hole          | 0.42 and -0.27 eÅ <sup>-3</sup>                                   |                           |

**Table S5.** Crystal structure, crystal data and structure refinement of **3c<sub>2</sub>** (CCDC 2106566).



## SUPPORTING INFORMATION

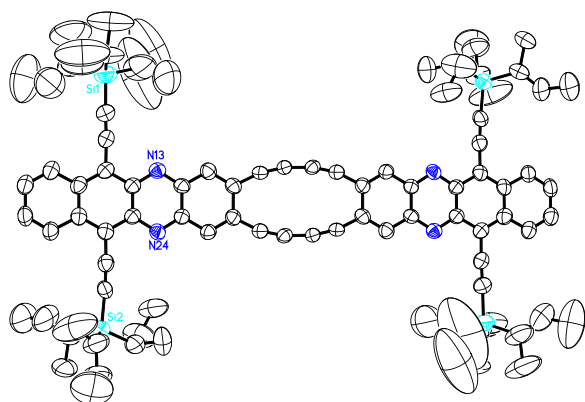

|                                      |                                                                  |                    |
|--------------------------------------|------------------------------------------------------------------|--------------------|
| Identification code                  | mai48                                                            |                    |
| Empirical formula                    | $C_{96}H_{120}N_4Si_4$                                           |                    |
| Formula weight                       | 1442.31                                                          |                    |
| Temperature                          | 200(2) K                                                         |                    |
| Wavelength                           | 1.54178 Å                                                        |                    |
| Crystal system                       | tetragonal                                                       |                    |
| Space group                          | $I4_1/a$                                                         |                    |
| Z                                    | 8                                                                |                    |
| Unit cell dimensions                 | $a = 45.2457(11)$ Å                                              | $\alpha = 90$ deg. |
|                                      | $b = 45.2457(11)$ Å                                              | $\beta = 90$ deg.  |
|                                      | $c = 8.5618(3)$ Å                                                | $\gamma = 90$ deg. |
| Volume                               | $17527.5(10)$ Å <sup>3</sup>                                     |                    |
| Density (calculated)                 | 1.09 g/cm <sup>3</sup>                                           |                    |
| Absorption coefficient               | 0.97 mm <sup>-1</sup>                                            |                    |
| Crystal shape                        | plank                                                            |                    |
| Crystal size                         | 0.226 x 0.018 x 0.016 mm <sup>3</sup>                            |                    |
| Crystal colour                       | red                                                              |                    |
| Theta range for data collection      | 2.8 to 49.7 deg.                                                 |                    |
| Index ranges                         | $-24 \leq h \leq 44$ , $-43 \leq k \leq 42$ , $-8 \leq l \leq 4$ |                    |
| Reflections collected                | 16239                                                            |                    |
| Independent reflections              | 4358 (R(int) = 0.1456)                                           |                    |
| Observed reflections                 | 2366 ( $I > 2\sigma(I)$ )                                        |                    |
| Absorption correction                | Semi-empirical from equivalents                                  |                    |
| Max. and min. transmission           | 0.99 and 0.66                                                    |                    |
| Refinement method                    | Full-matrix least-squares on $F^2$                               |                    |
| Data/restraints/parameters           | 4358 / 568 / 474                                                 |                    |
| Goodness-of-fit on $F^2$             | 1.09                                                             |                    |
| Final R indices ( $I > 2\sigma(I)$ ) | R1 = 0.126, wR2 = 0.272                                          |                    |
| Largest diff. peak and hole          | 0.37 and -0.25 eÅ <sup>-3</sup>                                  |                    |

**Table S6.** Crystal structure, crystal data and structure refinement of **3c<sub>3</sub>** (CCDC 2106567).

## SUPPORTING INFORMATION

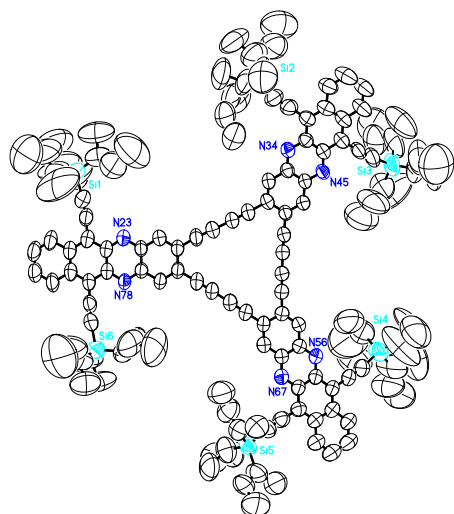

|                                   |                                                                  |                    |
|-----------------------------------|------------------------------------------------------------------|--------------------|
| Empirical formula                 | C <sub>144</sub> H <sub>180</sub> N <sub>6</sub> Si <sub>6</sub> |                    |
| Formula weight                    | 2163.47                                                          |                    |
| Temperature                       | 200(2) K                                                         |                    |
| Wavelength                        | 1.54178 Å                                                        |                    |
| Crystal system                    | monoclinic                                                       |                    |
| Space group                       | P2 <sub>1</sub> /n                                               |                    |
| Z                                 | 4                                                                |                    |
| Unit cell dimensions              | a = 25.8355(7) Å                                                 | α = 90 deg.        |
|                                   | b = 21.1688(6) Å                                                 | β = 94.014(2) deg. |
|                                   | c = 26.2914(9) Å                                                 | γ = 90 deg.        |
| Volume                            | 14343.7(7) Å <sup>3</sup>                                        |                    |
| Density (calculated)              | 1.00 g/cm <sup>3</sup>                                           |                    |
| Absorption coefficient            | 0.89 mm <sup>-1</sup>                                            |                    |
| Crystal shape                     | brick                                                            |                    |
| Crystal size                      | 0.185 x 0.180 x 0.108 mm <sup>3</sup>                            |                    |
| Crystal colour                    | dark green                                                       |                    |
| Theta range for data collection   | 3.4 to 49.1 deg.                                                 |                    |
| Index ranges                      | -15 ≤ h ≤ 25, -20 ≤ k ≤ 20, -25 ≤ l ≤ 25                         |                    |
| Reflections collected             | 57490                                                            |                    |
| Independent reflections           | 14037 (R(int) = 0.0452)                                          |                    |
| Observed reflections              | 8924 (I > 2σ(I))                                                 |                    |
| Absorption correction             | Semi-empirical from equivalents                                  |                    |
| Max. and min. transmission        | 0.92 and 0.32                                                    |                    |
| Refinement method                 | Full-matrix least-squares on F <sup>2</sup>                      |                    |
| Data/restraints/parameters        | 14037 / 5524 / 1651                                              |                    |
| Goodness-of-fit on F <sup>2</sup> | 2.31                                                             |                    |
| Final R indices (I > 2σ(I))       | R1 = 0.126, wR2 = 0.326                                          |                    |
| Largest diff. peak and hole       | 0.56 and -0.29 eÅ <sup>-3</sup>                                  |                    |

## References

- [S1] G. R. Fulmer, A. J. Miller, N. H. Sherden, H. E. Gottlieb, A. Nudelman, B. M. Stoltz, J. E. Bercaw, K. I. Goldberg, *Organometallics* **2010**, *29*, 2176-2179.
- [S2] Gaussian 16, Revision B.01, M. J. Frisch, G. W. Trucks, H. B. Schlegel, G. E. Scuseria, M. A. Robb, J. R. Cheeseman, G. Scalmani, V. Barone, G. A. Petersson, H. Nakatsuji, X. Li, M. Caricato, A. V. Marenich, J. Bloino, B. G. Janesko, R. Gomperts, B. Mennucci, H. P. Hratchian, J. V. Ortiz, A. F. Izmaylov, J. L. Sonnenberg, D. Williams-Young, F. Ding, F. Lipparini, F. Egidi, J. Goings, B. Peng, A. Petrone, T. Henderson, D. Ranasinghe, V. G. Zakrzewski, J. Gao, N. Rega, G. Zheng, W. Liang, M. Hada, M. Ehara, K. Toyota, R. Fukuda, J. Hasegawa, M. Ishida, T. Nakajima, Y. Honda, O. Kitao, H. Nakai, T. Vreven, K. Throssell, J. A. Montgomery, Jr., J. E. Peralta, F. Ogliaro, M. J. Bearpark, J. J. Heyd, E. N. Brothers, K. N. Kudin, V. N. Staroverov, T. A. Keith, R. Kobayashi, J. Normand, K. Raghavachari, A. P. Rendell, J. C. Burant, S. S. Iyengar, J. Tomasi, M. Cossi, J. M. Millam, M. Klene, C. Adamo, R. Cammi, J. W. Ochterski, R. L. Martin, K. Morokuma, O. Farkas, J. B. Foresman, and D. J. Fox, Gaussian, Inc., Wallingford CT, **2016**.
- [S3] a) D. Geuenich, R. Herges, *J. Phys. Chem. A* **2001**, *105*, 3214-3220; b) D. Geuenich, K. Hess, F. Koehler, R. Herges, *Chem. Rev.* **2005**, *105*, 3758-3772.
- [S4] U. H. F. Bunz, J. U. Engelhart, *Chem. Eur. J.* **2016**, *22*, 4680.
- [S5] P. R. Spackman, M. J. Turner, J. J. McKinnon, S. K. Wolff, D. J. Grimwood, D. Jayatilaka, M. A. J. Spackman, *Appl. Cryst.* **2021**, *54*, 1006-1011.
- [S6] G. te Velde, F.M. Bickelhaupt, E.J. Baerends, C. Fonseca Guerra, S.J.A. van Gisbergen, J.G. Snijders and T. Ziegler, Chemistry with ADF, *Journal of Computational Chemistry* **2001**, *22*, 931.

## SUPPORTING INFORMATION

- [S7] ADF 2021.1, SCM, Theoretical Chemistry, Vrije Universiteit, Amsterdam, The Netherlands, E.J. Baerends, T. Ziegler, A.J. Atkins, J. Autschbach, O. Baseggio, D. Bashford, A. Bérces, F.M. Bickelhaupt, C. Bo, P.M. Boerrigter, C. Cappelli, L. Cavallo, C. Daul, D.P. Chong, D.V. Chulhai, L. Deng, R.M. Dickson, J.M. Dieterich, F. Egidi, D.E. Ellis, M. van Faassen, L. Fan, T.H. Fischer, A. Förster, C. Fonseca Guerra, M. Franchini, A. Ghysels, A. Giammona, S.J.A. van Gisbergen, A. Goetz, A.W. Götz, J.A. Groeneveld, O.V. Gritsenko, M. Grüning, S. Gusarov, F.E. Harris, P. van den Hoek, Z. Hu, C.R. Jacob, H. Jacobsen, L. Jensen, L. Joubert, J.W. Kaminski, G. van Kessel, C. König, F. Kootstra, A. Kovalenko, M.V. Krykunov, P. Lafiosca, E. van Lenthe, D.A. McCormack, M. Medves, A. Michalak, M. Mitoraj, S.M. Morton, J. Neugebauer, V.P. Nicu, L. Noodleman, V.P. Osinga, S. Patchkovskii, M. Pavanello, C.A. Peeples, P.H.T. Philipsen, D. Post, C.C. Pye, H. Ramanantoanina, P. Ramos, W. Ravenek, M. Reimann, J.I. Rodríguez, P. Ros, R. Rüger, P.R.T. Schipper, D. Schlüns, H. van Schoot, G. Schreckenbach, J.S. Seldenthuis, M. Seth, J.G. Snijders, M. Solà, M. Stener, M. Swart, D. Swerhone, V. Tognetti, G. te Velde, P. Vernooijs, L. Versluis, L. Visscher, O. Visser, F. Wang, T.A. Wesolowski, E.M. van Wezenbeek, G. Wiesenekker, S.K. Wolff, T.K. Woo, A.L. Yakovlev
- [S8] A. Moliterni, D. Altamura, R. Lassandro, V. Olieric, G. Ferri, F. Cardarelli, A. Camposeo, D. Pisignano, J. E. Anthony, C. Giannini, *Acta Cryst.* **2020**, *B76*, 427–435.
- [S9] D. Liu, Z. He, Y. Su, Y. Diao, S.C.B. Mannsfeld, Z. Bao, J. Xu, Q. Miao. *Adv. Mater.* **2014**, *26*: 7190-7196
- [S10] B. D. Lindner, F. Paulus, A. L. Appleton, M. Schaffroth, J. U. Engelhart, K. M. Schelkle, O. Tverskoy, F. Rominger, M. Hamburger, U. H. F. Bunz, *J. Mater. Chem. C* **2014**, *2*, 9609–9612
